# Supplementary material for: Different transmission routes and the risk of advanced HIV disease: A systematic review and network meta-analysis of observational studies
Source: PubMed Central journal article supplement — eClinicalMedicine. 2019 Nov 2;16:121–8. doi: 10.1016/j.eclinm.2019.10.003 (PMC6890975; doi:10.1016/j.eclinm.2019.10.003), 2019-11-02
Supplement: mmc1.pdf [file mmc1.pdf]

# *Appendix A*

*Title: Different transmission routes and the risk of advanced HIV  
disease: A systematic review and network meta-analysis of  
observational studies*

*Author: Qiaosen Chen, Ding Zeng, Yangyang She, Yuhan Lyu,  
Xiao Gong, Matthew J. Feinstein, Yi Yang, Hongbo Jiang*

*Date:2019.09.30*

# Contents

|                                                                                                                                 |    |
|---------------------------------------------------------------------------------------------------------------------------------|----|
| <i>Appendix A1 (Abbreviations and the criterion of rounding off for numerical values)</i> .....                                 | 1  |
| <i>Appendix A2 (Search algorithms)</i> .....                                                                                    | 2  |
| <i>Appendix A3 (Characteristic of included studies)</i> .....                                                                   | 4  |
| 3.1 <i>Table 1: Characteristics of included studies in this review</i> .....                                                    | 4  |
| 3.2 <i>Table 2: Methodological quality assessment for cross-sectional/surveillance studies</i> ....                             | 9  |
| 3.3 <i>Table 3: Methodological quality assessment for cohort studies</i> .....                                                  | 13 |
| <i>Appendix A4 (Assessment of data convergence)</i> .....                                                                       | 15 |
| 4.1 <i>Figure 1: Trace plot and density plot</i> .....                                                                          | 15 |
| 4.2 <i>Figure 2: Gelman-Rubin-Brooks plot</i> .....                                                                             | 16 |
| <i>Appendix A5 (Network plot, heterogeneity and sensitivity analyses including high-quality studies)</i> .....                  | 17 |
| 5.1 <i>Figure 1: Network plot and Bayesian network meta-analysis estimates<sup>a</sup></i> .....                                | 17 |
| 5.2 <i>Table 1: Assessment of heterogeneity including all the study</i> .....                                                   | 18 |
| 5.3 <i>Figure 2: Network plot and Bayesian network meta-analysis estimates including high-quality studies<sup>a</sup></i> ..... | 19 |
| <i>Appendix A6 (Funnel plot to assess the publication bias)</i> .....                                                           | 20 |
| 6.1 <i>Figure 1: Conventional funnel plot with Y-axis of standard error</i> .....                                               | 20 |
| 6.2 <i>Figure 2: Conventional funnel plot with Y-axis of inverse of standard error</i> .....                                    | 21 |
| 6.3 <i>Figure 3: Contour-enhanced funnel plot with Y-axis of standard error</i> .....                                           | 22 |
| 6.4 <i>Figure 4: Contour-enhanced funnel plot with Y-axis of inverse of standard error</i> .....                                | 23 |
| 6.5 <i>Explanation of conventional/contour-enhanced funnel plot</i> .....                                                       | 24 |
| <i>Appendix A7 (SUCRA)</i> .....                                                                                                | 25 |
| 7.1 <i>Figure 1: The surface under the cumulative ranking curve (SUCRA)</i> .....                                               | 25 |
| <i>Appendix A8 (Subgroup analysis of network meta-analysis)</i> .....                                                           | 26 |
| 8.1 <i>Continent results</i> .....                                                                                              | 26 |

|                                                                                                                 |                                                                                                                                                                                                     |    |
|-----------------------------------------------------------------------------------------------------------------|-----------------------------------------------------------------------------------------------------------------------------------------------------------------------------------------------------|----|
| 8.2                                                                                                             | <i>PPP<sup>a</sup> 2009 Adjusted by International \$</i> .....                                                                                                                                      | 31 |
| 8.3                                                                                                             | <i>Study method</i> .....                                                                                                                                                                           | 33 |
| 8.4                                                                                                             | <i>Time lag</i> .....                                                                                                                                                                               | 36 |
| 8.5                                                                                                             | <i>Prevalence of AHD</i> .....                                                                                                                                                                      | 38 |
| <i>Appendix A9 (Assessment of AHD risk among PLHIV via HC under different sex work policies)</i> .....          |                                                                                                                                                                                                     | 40 |
| 9.1                                                                                                             | <i>Table 1: Characteristic of the studies for ecological regression to assess the AHD risk among PLHIV via HC under different sex work policies</i> .....                                           | 40 |
| 9.2                                                                                                             | <i>Table 2: Sensitivity analysis regarding the relation between sex work policies and the AHD among PLHIV through HC</i> .....                                                                      | 41 |
| <i>Appendix A10 (Assessment of AHD risk among PLHIV via IDU under different types of law towards CCC)</i> ..... |                                                                                                                                                                                                     | 42 |
| 10.1                                                                                                            | <i>Table 1: Characteristic of the studies for ecological regression to assess the AHD risk among PLHIV via IDU under different types of law towards CCC</i> .....                                   | 42 |
| 10.2                                                                                                            | <i>Table 2: Sensitivity analysis regarding the relationship between criminal justice legislation towards CCC and AHD among PLHIV through IDU using different ecological regression models</i> ..... | 43 |
| <i>Appendix A11 (PPP tendency regarding included studies in the review)</i> .....                               |                                                                                                                                                                                                     | 44 |
| 11.1                                                                                                            | <i>Figure 1: PPP tendency during the period from 1990 to 2018</i> .....                                                                                                                             | 44 |
| 11.2                                                                                                            | <i>Table 1: Detailed PPP in 15 of 28 regions incorporated in ecological analysis during the period from 1990 to 2018</i> .....                                                                      | 45 |
| 11.3                                                                                                            | <i>Table 2: Detailed PPP in 13 of 28 regions incorporated in ecological analysis during the period from 1990 to 2018</i> .....                                                                      | 46 |
| <i>Appendix A12 (References included in this review)</i> .....                                                  |                                                                                                                                                                                                     | 47 |

***Appendix A1 (Abbreviations and the criterion of rounding off for numerical values)***

MSM: men who have sex with men  
IDU: injection drug use/injection drug user  
HC: heterosexual contact  
HIV: human immunodeficiency virus  
UK: the United Kingdom  
USA: the United States of America  
AHD: advanced HIV disease  
PLHIV: people living with HIV  
NA: not available  
OR: odds ratio  
CrI: credible interval  
CI: confidence interval  
SUCRA<sup>a</sup>: The surface under the cumulative ranking curve  
GDP: gross domestic product  
PPP: GDP per capita (current international \$)  
CCC: compulsory commitment to the care of substance misusers  
C: criminal  
S: special/social  
M: mental health  
Ref.: Reference group  
China (ML): China (Mainland)  
China (HK): China (Hong Kong)

In this review, the banker's rounding was adopted.

a: SUCRA exhibits the mean rank regarding the risk of AHD among PLHIV via different transmission routes (MSM, IDU and HC). The higher the value, the higher the risk of AHD.

## ***Appendix A2 (Search algorithms)***

### **EMBASE:**

#1 'late testers' AND hiv OR ('late presentation' AND hiv) OR ('late diagnosis' AND hiv) OR 'advanced hiv disease' OR ('late presenters' AND hiv) OR 'late hiv diagnosis' OR ('delayed diagnosis' AND hiv) OR ('hiv testing' AND late) OR 'CD4 cell count less than 200' OR 'CD4 cell count below 200' OR "CD4 less than 200" OR "CD4 below 200" OR "CD4 T cell count less than 200" OR 'CD4 T cell count below 200' OR 'CD4 T lymphocytes less than 200' OR 'CD4 T lymphocytes below 200' OR 'AIDS-related disease' OR 'AIDS-related illness' OR 'AIDS-defining illness' OR 'AIDS-defining disease'

#2 transmission OR 'transmission mode' OR 'transmission route' OR 'men who have sex with men' OR 'men who have sex with men and woman' OR heterosexual OR 'heterosexual contact' OR 'injection drug user' OR 'people who inject drug' OR 'intravenous drug abuse' OR 'intravenous drug use' OR transgender

1# AND 2#

### **PubMed:**

("AIDS-defining disease"[All Fields] OR "AIDS-defining illness"[All Fields] OR "AIDS-related disease"[All Fields] OR "AIDS-related illness"[All Fields] OR "CD4 cell count less than 200"[All Fields] OR "CD4 cell count below 200"[All Fields] OR "CD4 < 200"[All Fields] OR "CD4 cell count < 200"[All Fields] OR "CD4 T cell count < 200"[All Fields] OR "CD4 T lymphocytes less than 200"[All Fields] OR "CD4 T lymphocytes below 200"[All Fields] OR "CD4 T lymphocytes < 200"[All Fields] OR ("HIV testing"[All Fields] AND late[All Fields]) OR ("delayed diagnosis"[All Fields] AND ("hiv"[MeSH Terms] OR "hiv"[All Fields])) OR "late HIV diagnosis"[All Fields] OR ("late presenters"[All Fields] AND ("hiv"[MeSH Terms] OR "hiv"[All Fields])) OR "advanced HIV disease"[All Fields] OR ("late diagnosis"[All Fields] AND ("hiv"[MeSH Terms] OR "hiv"[All Fields])) OR ("late presentation"[All Fields] AND ("hiv"[MeSH Terms] OR "hiv"[All Fields])) OR ("late testers"[All Fields] AND ("hiv"[MeSH Terms] OR "hiv"[All Fields])) AND (("transmission"[Subheading] OR "transmission"[All Fields]) OR (("transmission"[Subheading] OR "transmission"[All Fields]) AND mode[All Fields]) OR (("transmission"[Subheading] OR "transmission"[All Fields]) AND ("drug administration routes"[MeSH Terms] OR "drug"[All Fields] AND "administration"[All Fields] AND "routes"[All Fields]) OR "drug administration routes"[All Fields] OR "route"[All Fields])) OR ("sexual and gender minorities"[MeSH Terms] OR ("sexual"[All Fields] AND "gender"[All Fields] AND "minorities"[All Fields]) OR "sexual and gender minorities"[All Fields] OR ("men"[All Fields] AND "who"[All Fields] AND "sex"[All Fields] AND "men"[All Fields]) OR "men who have sex with men"[All Fields]) OR ("sexual and gender minorities"[MeSH Terms] OR ("sexual"[All Fields] AND "gender"[All Fields] AND "minorities"[All Fields]) OR "sexual and gender minorities"[All Fields] OR ("men"[All Fields] AND "who"[All Fields] AND "sex"[All Fields] AND "men"[All Fields]) OR "men who have sex with men"[All Fields]) AND ("women"[MeSH Terms] OR "women"[All Fields] OR "woman"[All Fields])) OR ("heterosexuality"[MeSH Terms] OR "heterosexuality"[All Fields] OR "heterosexual"[All Fields]) OR ("heterosexuality"[MeSH Terms] OR "heterosexuality"[All Fields] OR "heterosexual"[All Fields])

Fields]) AND ("Contact"[Journal] OR "Contact"[Journal] OR "Contact (Thousand Oaks)"[Journal] OR "contact"[All Fields])) OR (("injections"[MeSH Terms] OR "injections"[All Fields] OR "injection"[All Fields]) AND ("drug users"[MeSH Terms] OR ("drug"[All Fields] AND "users"[All Fields]) OR "drug users"[All Fields] OR ("drug"[All Fields] AND "user"[All Fields]) OR "drug user"[All Fields])) OR (("persons"[MeSH Terms] OR "persons"[All Fields] OR "people"[All Fields]) AND who[All Fields] AND inject[All Fields] AND drug[All Fields]) OR ("substance abuse, intravenous"[MeSH Terms] OR ("substance"[All Fields] AND "abuse"[All Fields] AND "intravenous"[All Fields]) OR "intravenous substance abuse"[All Fields] OR ("intravenous"[All Fields] AND "drug"[All Fields] AND "abuse"[All Fields]) OR "intravenous drug abuse"[All Fields]) OR (intravenous[All Fields] AND drug[All Fields]) OR ("transgender persons"[MeSH Terms] OR ("transgender"[All Fields] AND "persons"[All Fields]) OR "transgender persons"[All Fields] OR "transgender"[All Fields]))))

### **Web of Science**

TS=(transmission OR "transmission mode" OR "transmission route" OR "men who have sex with men" OR "men who have sex with men and woman" OR heterosexual OR "heterosexual contact" OR "injection drug user" OR "people who inject drug" OR "intravenous drug abuse" OR "intravenous drug use" OR transgender) AND TS=(("HIV testing" AND late) OR ("delayed diagnosis" AND HIV ) OR ("late HIV diagnosis") OR ("late presenters" AND HIV) OR ("advanced HIV disease") OR ("late diagnosis" AND HIV) OR ("late presentation" AND HIV) OR ("late testers" AND HIV) OR ("CD4 < 200") OR ("CD4 less than 200") OR ("CD4 below 200") OR ("CD4 cell count less than 200") OR ("CD4 cell count below 200") OR ("CD4 cell count < 200") OR ("CD4 T cell count < 200") OR ("CD4 T lymphocytes < 200") OR ("CD4 T lymphocytes less than 200") OR ("CD4 T lymphocytes below 200") OR ("AIDS-related disease") OR ("AIDS-related illness") OR ("AIDS-defining illness") OR ("AIDS-defining disease"))

Chinese databases were searched by similar algorithms.

**Appendix A3 (Characteristic of included studies)**

**3.1 Table 1: Characteristics of included studies in this review**

| Study                                  | Region            | Continent     | Study method  | Time lag <sup>a</sup> | Study period | No. of AHD | No. of PLHIV | No. of Male | No. of Female | Age <sup>b</sup> |
|----------------------------------------|-------------------|---------------|---------------|-----------------------|--------------|------------|--------------|-------------|---------------|------------------|
| 2003 Wong KH <sup>1</sup>              | China (Hong Kong) | Asia          | surveillance  | 3                     | 1984-2000    | 365        | 1530         | 1269        | 261           | NA               |
| 2006 McDonald EA <sup>2</sup>          | Australia         | Oceania       | surveillance  | 3                     | 1985-2005    | 52         | 319          | 275         | 44            | NA               |
| 2010 Kivelä PS <sup>3</sup>            | Finland           | Europe        | surveillance  | 3                     | 1985-2005    | 211        | 934          | 719         | 215           | 33               |
| 2000 Girardi E <sup>4</sup>            | Italy             | Europe        | surveillance  | 3                     | 1986-1998    | 503        | 1967         | 1484        | 483           | >18              |
| 2013 Spornraft-Ragaller P <sup>5</sup> | Germany           | Europe        | cohort        | 3                     | 1986-2010    | 188        | 348          | 278         | 70            | 34-8             |
| 2009 Carnicer-Pont D <sup>6</sup>      | Spain             | Europe        | surveillance  | 3                     | 1987-2006    | 2713       | 6186         | 4984        | 1202          | 36               |
| 2002 Castilla J <sup>7</sup>           | Spain             | Europe        | surveillance  | 1                     | 1994-1996    | 7283       | 26580        | 21281       | 5299          | >15              |
| 2009 Lemoh C <sup>8</sup>              | Australia         | Oceania       | surveillance  | 3                     | 1994-2006    | 627        | 2779         | 2530        | 249           | 37               |
| 2015 Jiang HB <sup>9</sup>             | China (Mainland)  | Asia          | surveillance  | 1                     | 1994-2012    | 289        | 980          | 803         | 177           | 36               |
| 2012 Helleberg M <sup>10</sup>         | Denmark           | Europe        | cohort        | NA                    | 1995-2009    | 1039       | 3027         | 2286        | 741           | 37               |
| 2005 Longo B <sup>11</sup>             | Italy             | Europe        | surveillance  | 6                     | 1996-2002    | 6253       | 17007        | 12980       | 4027          | >18              |
| 2006 Delpierre C <sup>12</sup>         | France            | Europe        | cohort        | NA                    | 1996-2005    | 1718       | 4516         | 3116        | 1400          | 37               |
| 2012 Tey JSH. <sup>13</sup>            | Singapore         | Asia          | surveillance  | 12                    | 1996-2009    | 2012       | 3735         | 3358        | 377           | >15              |
| 2016 Op De Coul ELM <sup>14</sup>      | Netherlands       | Europe        | cohort        | 3                     | 1996-2014    | 7331       | 20965        | 16877       | 4088          | 36               |
| 2007 Teira Cobo R <sup>15</sup>        | Spain             | Europe        | cohort        | 1                     | 1997-2002    | 506        | 2820         | NA          | NA            | NA               |
| 2011 Ndiaye B <sup>16</sup>            | France            | Europe        | surveillance  | NA                    | 1997-2007    | 570        | 1819         | NA          | NA            | 35               |
| 2018 Lee CY <sup>17</sup>              | China (Taiwan)    | Asia          | cohort        | 3                     | 1998-2012    | 4571       | 22665        | 21085       | 1580          | 32-74            |
| 2004 Manavi K <sup>18</sup>            | UK                | Europe        | cross-section | 1                     | 1999-2003    | 65         | 189          | 145         | 44            | NA               |
| 2016 Maquera-Afaray J <sup>19</sup>    | Peru              | South America | surveillance  | 0                     | 1999-2012    | 1106       | 1714         | 1224        | 490           | 35               |
| 2015 Wright ST <sup>20</sup>           | Australia         | Oceania       | cohort        | 6                     | 1999-2012    | 245        | 1202         | 1118        | 84            | NA               |
| 2009 Wohl AR <sup>21</sup>             | USA               | North America | cross-section | 12                    | 2000-2004    | 267        | 383          | 316         | 67            | NA               |
| 2013 Rurangirwa J <sup>22</sup>        | USA               | North America | surveillance  | 6                     | 2000-2004    | 3424       | 9031         | NA          | NA            | >18              |
| 2011 Tang JJ <sup>23</sup>             | USA               | North America | surveillance  | 12                    | 2000-2006    | 17364      | 28382        | NA          | NA            | NA               |
| 2010 Lee JH <sup>24</sup>              | South Korea       | Asia          | surveillance  | 6                     | 2000-2007    | 858        | 2299         | 2108        | 191           | >15              |

**Table 1: Characteristics of included studies in this review (continued)**

| Study                                 | Region                | Continent     | Study method  | Time lag <sup>a</sup> | Study period | No. of AHD | No. of PLHIV | No. of Male | No. of Female | Age <sup>b</sup> |
|---------------------------------------|-----------------------|---------------|---------------|-----------------------|--------------|------------|--------------|-------------|---------------|------------------|
| 2010 Yang BR <sup>25</sup>            | USA                   | North America | cross-section | 3                     | 2000-2007    | 3110       | 9964         | 7225        | 2739          | ≥13              |
| 2012 Saganic L <sup>26</sup>          | USA                   | North America | surveillance  | 12                    | 2000-2008    | 704        | 1904         | 1622        | 282           | NA               |
| 2016 Tossas-Milligan KY <sup>27</sup> | Puerto Rico           | North America | cohort        | 12                    | 2000-2011    | 377        | 795          | 508         | 287           | ≥18              |
| 2013 Mocreft A <sup>28</sup>          | 35 European countries | Europe        | cohort        | 6                     | 2000-2011    | 28081      | 84524        | NA          | NA            | NA               |
| 2009 Duffus WA <sup>29</sup>          | USA                   | North America | cohort        | 12                    | 2001-2005    | 1311       | 2564         | 1594        | 970           | ≥18              |
| 2018 Li X <sup>30</sup>               | China (Mainland)      | Asia          | surveillance  | NA                    | 2001-2017    | 361        | 783          | 673         | 110           | >50              |
| 2007 Delpierre C <sup>31</sup>        | France                | Europe        | cross-section | NA                    | 2002-2003    | 384        | 954          | NA          | NA            | 37               |
| 2016 Kundro MA <sup>32</sup>          | Argentina             | South America | surveillance  | 6                     | 2002-2014    | 167        | 993          | 249         | 744           | 31               |
| 2011 Colucci A <sup>33</sup>          | Italy                 | Europe        | cross-section | 6                     | 2003-2005    | 127        | 245          | 201         | 43            | 42-3             |
| 2010 Oliva J <sup>34</sup>            | Spain                 | Europe        | cross-section | 0                     | 2003-2007    | 1177       | 3129         | 2497        | 632           | NA               |
| 2011 Leutscher PDC <sup>35</sup>      | Denmark               | Europe        | cohort        | 0                     | 2003-2009    | 63         | 194          | 138         | 56            | 38               |
| 2016 Jeong SJ <sup>36</sup>           | 13 Asian countries    | Asia          | cohort        | 3                     | 2003-2012    | 2681       | 3744         | 2691        | 1053          | 34               |
| 2009 Sobrino-Vegas P <sup>37</sup>    | Spain                 | Europe        | cohort        | 6                     | 2004-2006    | 653        | 1749         | 1358        | 391           | >13              |
| 2016 Sobrino-Vegas P <sup>38</sup>    | Spain                 | Europe        | cohort        | 6                     | 2004-2013    | 2049       | 7165         | 5959        | 1206          | 34               |
| 2016 Liu ZQ <sup>39</sup>             | China (Mainland)      | Asia          | surveillance  | NA                    | 2004-2015    | 1210       | 3447         | 3194        | 253           | NA               |
| 2012 Dickson NP <sup>40</sup>         | New Zealand           | Oceania       | surveillance  | 3                     | 2005-2010    | 194        | 606          | NA          | NA            | NA               |
| 2017 Sun L <sup>41</sup>              | China (Mainland)      | Asia          | cross-section | NA                    | 2005-2015    | 288        | 771          | 672         | 99            | NA               |
| 2017 Zhang NN <sup>42</sup>           | China (Mainland)      | Asia          | surveillance  | NA                    | 2005-2015    | 182        | 658          | 525         | 133           | NA               |
| 2008 Kiertiburanakul S <sup>43</sup>  | Thailand              | Asia          | surveillance  | NA                    | 2006-2006    | 68         | 141          | 79          | 62            | 35-5             |
| 2011 Lo YC <sup>44</sup>              | China (Taiwan)        | Asia          | cohort        | 3                     | 2006-2008    | 107        | 227          | 220         | 7             | 31               |
| 2017 Pyziak-Kowalska KA <sup>45</sup> | Poland                | Europe        | surveillance  | NA                    | 2006-2008    | 363        | 1132         | 911         | 221           | 31-3             |
| 2017 Mao LC <sup>46</sup>             | China (Mainland)      | Asia          | surveillance  | NA                    | 2006-2015    | 174        | 589          | 56          | 533           | NA               |
| 2014 Trepka MJ <sup>47</sup>          | USA                   | North America | cohort        | 3                     | 2007-2011    | 7060       | 25585        | 18533       | 7052          | >12              |
| 2014 Oliva J <sup>48</sup>            | Spain                 | Europe        | surveillance  | 3                     | 2007-2011    | 3356       | 11426        | 9278        | 2148          | 35               |
| 2012 Bai F <sup>49</sup>              | Italy                 | Europe        | cohort        | 1                     | 2007-2011    | 79         | 275          | 225         | 50            | 31               |



**Table 1: Characteristics of included studies in this review (continued)**

| Study                               | Region               | Continent     | Study method  | Time lag <sup>a</sup> | Study period | No. of AHD | No. of PLHIV | No. of Male | No. of Female | Age <sup>b</sup> |
|-------------------------------------|----------------------|---------------|---------------|-----------------------|--------------|------------|--------------|-------------|---------------|------------------|
| 2015 Valentini MB <sup>50</sup>     | Brazil               | South America | cross-section | 12                    | 2008-2010    | 193        | 520          | NA          | NA            | NA               |
| 2012 Tang HL <sup>51</sup>          | China (Mainland)     | Asia          | cross-section | NA                    | 2009-2010    | 2496       | 3912         | 2414        | 1498          | 43-4             |
| 2015 Dai SY <sup>52</sup>           | China (Mainland)     | Asia          | cross-section | 12                    | 2009-2010    | 653        | 899          | 608         | 291           | >18              |
| 2013 Hall HI <sup>53</sup>          | Australia            | Oceania       | surveillance  | 3                     | 2010-2010    | 198        | 1051         | 896         | 150           | NA               |
| 2013 Hall HI <sup>53</sup>          | Canada               | North America | surveillance  | 3                     | 2010-2010    | 130        | 1472         | 1165        | 306           | NA               |
| 2013 Hall HI <sup>53</sup>          | France               | Europe        | surveillance  | 3                     | 2010-2010    | 959        | 6265         | 4199        | 2066          | NA               |
| 2013 Hall HI <sup>53</sup>          | Italy                | Europe        | surveillance  | 3                     | 2010-2010    | 557        | 3839         | 2889        | 943           | NA               |
| 2013 Hall HI <sup>53</sup>          | USA                  | North America | surveillance  | 3                     | 2010-2010    | 12378      | 43130        | 33609       | 9521          | NA               |
| 2016 Jin X <sup>54</sup>            | China (Mainland)     | Asia          | surveillance  | NA                    | 2010-2014    | 151088     | 398573       | NA          | NA            | NA               |
| 2016 Levy I <sup>55</sup>           | Israel               | Asia          | cohort        | 0                     | 2010-2015    | 57         | 356          | 300         | 56            | NA               |
| 2017 Lin ZM <sup>56</sup>           | China (Mainland)     | Asia          | surveillance  | NA                    | 2010-2016    | 19624      | 47343        | 38259       | 9084          | 44-49            |
| 2015 Qi Y <sup>57</sup>             | China (Mainland)     | Asia          | surveillance  | NA                    | 2011-2014    | 148        | 411          | 348         | 63            | 39-34            |
| 2018 Jin L <sup>58</sup>            | China (Mainland)     | Asia          | surveillance  | NA                    | 2011-2015    | 2949       | 7073         | 5696        | 1377          | 38-5             |
| 2017 Guo Y <sup>59</sup>            | China (Mainland)     | Asia          | surveillance  | NA                    | 2011-2015    | 916        | 2922         | 2761        | 161           | 34-49            |
| 2018 Li JZ <sup>60</sup>            | China (Mainland)     | Asia          | surveillance  | NA                    | 2011-2016    | 273        | 1365         | 1306        | 59            | 37-78            |
| 2018 Zhang HL <sup>61</sup>         | China (Mainland)     | Asia          | surveillance  | NA                    | 2011-2017    | 2088       | 7427         | 6811        | 616           | 34               |
| 2014 Pan XH <sup>62</sup>           | China (Mainland)     | Asia          | cross-section | 1                     | 2012-2012    | 500        | 1894         | 1511        | 383           | 36-4             |
| 2017 Senard O <sup>63</sup>         | France               | Europe        | cohort        | 0                     | 2012-2013    | 49         | 186          | 137         | 49            | 37-13            |
| 2017 Chkhartishvili N <sup>64</sup> | Georgia              | Asia          | cohort        | 6                     | 2012-2015    | 870        | 1987         | 1478        | 509           | 37               |
| 2017 Li X <sup>65</sup>             | China (Mainland)     | Asia          | surveillance  | NA                    | 2012-2016    | 931        | 3064         | 2850        | 214           | NA               |
| 2018 Fakoya I <sup>66</sup>         | 9 European countries | Europe        | cross-section | 0                     | 2013-2015    | 431        | 1812         | 1226        | 586           | >18              |
| 2016 Meng Q <sup>67</sup>           | China (Mainland)     | Asia          | surveillance  | NA                    | 2014-2014    | 4928       | 9526         | 6844        | 2682          | NA               |
| 2017 Cuzin L <sup>68</sup>          | France               | Europe        | cohort        | 3                     | 2014-2015    | 363        | 1421         | 1098        | 323           | 37               |
| 2017 Chen ZB <sup>69</sup>          | China (Mainland)     | Asia          | surveillance  | 12                    | 2016-2016    | 109        | 300          | 187         | 113           | 36-2             |
| 2014 Wilson K <sup>70</sup>         | France               | Europe        | cross-section | NA                    | 1996-2011    | 308        | 1096         | 649         | 327           | ≥18              |

**Table 1: Characteristics of included studies in this review (continued)**

| Study                           | Region           | Continent     | Study method  | Time lag <sup>a</sup> | Study period | No. of AHD | No. of PLHIV | No. of Male | No. of Female | Age <sup>b</sup> |
|---------------------------------|------------------|---------------|---------------|-----------------------|--------------|------------|--------------|-------------|---------------|------------------|
| 2012 Toure A <sup>71</sup>      | France           | Europe        | cohort        | 0                     | 1992-2006    | 1139       | 3570         | 2731        | 837           | 36-3             |
| 2019 Siwak E <sup>72</sup>      | Poland           | Europe        | cross-section | 0                     | 2000-2015    | 1380       | 3869         | 3224        | 545           | 33               |
| 2006 Schwarcz S <sup>73</sup>   | USA              | North America | surveillance  | 12                    | 2001-2006    | 830        | 2139         | 1894        | 174           | ≥13              |
| 2010 Mena M <sup>74</sup>       | Italy            | Europe        | surveillance  | 1                     | 2000-2008    | 76         | 156          | 124         | 32            | 41               |
| 2003 McDonald AM <sup>75</sup>  | Australia        | Oceania       | surveillance  | NA                    | 1992-2001    | 1176       | 5097         | 4739        | 358           | NA               |
| 2019 Lim CL <sup>76</sup>       | Malaysia         | Asia          | cohort        | 0                     | 2007-2016    | 3880       | 8757         | 7400        | 1357          | 34-8             |
| 2007 Lanoy E <sup>77</sup>      | France           | Europe        | cohort        | 3                     | 1997-2002    | 6687       | 18721        | 13145       | 5576          | ≥15              |
| 2019 Hu X <sup>78</sup>         | China (Mainland) | Asia          | cross-section | 3                     | 2012-2016    | 20325      | 45118        | 32028       | 13090         | 50.3             |
| 2001 de Munain JL <sup>79</sup> | Spain            | Europe        | surveillance  | 0                     | 1998-2000    | 45         | 125          | NA          | NA            | 37-3             |
| 2009 Chen KT <sup>80</sup>      | China (Taiwan)   | Asia          | surveillance  | 3                     | 1990-2005    | 2389       | 9961         | 9104        | 857           | 32               |
| 2009 Shouse RL <sup>81</sup>    | USA              | North America | surveillance  | 12                    | 1998-2005    | 107784     | 281421       | 200882      | 80539         | NA               |
| 2006 Castilla J <sup>82</sup>   | Spain            | Europe        | surveillance  | NA                    | 2000-2004    | 616        | 1407         | 1071        | 336           | 37               |
| 2016 Reinhardt S <sup>83</sup>  | Guatemala        | South America | cohort        | 0                     | 2015-2015    | 931        | 3686         | 2133        | 1553          | 34-4             |
| 2005 Brannstrom J <sup>84</sup> | Sweden           | Europe        | surveillance  | 3                     | 1996-2002    | 219        | 487          | 360         | 127           | ≥15              |
| 2019 Luo TF <sup>85</sup>       | China (Mainland) | Asia          | surveillance  | NA                    | 2005-2018    | 320        | 608          | 442         | 166           | NA               |
| 2018 Chen LY <sup>86</sup>      | China (Mainland) | Asia          | surveillance  | NA                    | 2006-2017    | 549        | 2132         | 1254        | 878           | ≥18              |
| 2019 Zhang M <sup>87</sup>      | China (Mainland) | Asia          | surveillance  | NA                    | 2011-2017    | 592        | 1562         | 1038        | 524           | 46-75            |
| 2018 Liang HM <sup>88</sup>     | China (Mainland) | Asia          | surveillance  | NA                    | 2011-2016    | 1885       | 5213         | 4357        | 856           | 36-57            |
| 2018 Xie H <sup>89</sup>        | China (Mainland) | Asia          | surveillance  | NA                    | 2012-2016    | 679        | 1387         | 977         | 410           | NA               |
| 2018 Tang H <sup>90</sup>       | China (Mainland) | Asia          | surveillance  | NA                    | 2012-2016    | 4508       | 11832        | 9679        | 2153          | ≥15              |
| 2019 Yang K <sup>91</sup>       | China (Mainland) | Asia          | surveillance  | NA                    | 2016-2017    | 1953       | 5826         | 4748        | 1078          | 43               |
| 2019 Xu Y <sup>92</sup>         | China (Mainland) | Asia          | surveillance  | NA                    | 2007-2017    | 187        | 628          | 532         | 96            | 37-56            |
| 2018 Huang YL <sup>93</sup>     | China (Mainland) | Asia          | surveillance  | NA                    | 2011-2017    | 901        | 2551         | 2071        | 480           | NA               |
| 2019 Yang ZK <sup>94</sup>      | China (Mainland) | Asia          | surveillance  | NA                    | 2015-2017    | 202        | 776          | 626         | 150           | 39-32            |
| 2019 Duan ZR <sup>95</sup>      | China (Mainland) | Asia          | surveillance  | NA                    | 2012-2016    | 282        | 693          | 508         | 185           | 53               |

**Table 1: Characteristics of included studies in this review (continued)**

| Study                        | Region           | Continent | Study method | Time lag <sup>a</sup> | Study period | No. of AHD | No. of PLHIV | No. of Male | No. of Female | Age <sup>b</sup> |
|------------------------------|------------------|-----------|--------------|-----------------------|--------------|------------|--------------|-------------|---------------|------------------|
| 2018 Bing PF <sup>96</sup>   | China (Mainland) | Asia      | surveillance | NA                    | 2012-2017    | 829        | 3605         | 3239        | 366           | 35·36            |
| 2018 Xu QS <sup>97</sup>     | China (Mainland) | Asia      | surveillance | 12                    | 2005-2016    | 33         | 210          | 168         | 42            | 30·32            |
| 2019 Zhang ZH <sup>98</sup>  | China (Mainland) | Asia      | surveillance | NA                    | 2013-2017    | 253        | 714          | 627         | 87            | 36·2             |
| 2018 Ye L <sup>99</sup>      | China (Mainland) | Asia      | surveillance | NA                    | 2010-2017    | 333        | 972          | 830         | 142           | 39               |
| 2019 Zhu Y <sup>100</sup>    | China (Mainland) | Asia      | surveillance | NA                    | 2012-2017    | 442        | 931          | 667         | 264           | 56               |
| 2018 Huang SZ <sup>101</sup> | China (Mainland) | Asia      | surveillance | NA                    | 2012-2016    | 323        | 933          | 802         | 131           | 36·5             |

a: Time lag was defined as the time between the initial diagnosis of HIV and the development of AIDS. The time lag of 0 month represents a CD4 count < 200 cells/ $\mu$ L or AIDS at diagnosis

b: Mean/Median age or age of range

A more detailed information table is provided in *Appendix B Table 1: Detailed information of included studies in this review continued to Appendix A3 3.1 Table 1: Characteristics of included studies in this review.*

3.2 Table 2: Methodological quality assessment for cross-sectional/surveillance studies

| Study                                | Selection                        |             |                 | Ascertainment of transmission | Comparability based on design and analyses <sup>a</sup> | Outcome           |                  | Sum of scores |
|--------------------------------------|----------------------------------|-------------|-----------------|-------------------------------|---------------------------------------------------------|-------------------|------------------|---------------|
|                                      | Representativeness of the sample | Sample size | Non-respondents |                               |                                                         | Assessment of AHD | Statistical test |               |
| 2018 Jin L <sup>58</sup>             | 1                                | 0           | 1               | 2                             | 0                                                       | 2                 | 1                | 7             |
| 2012 Tang HL <sup>51</sup>           | 1                                | 0           | 1               | 2                             | 0                                                       | 2                 | 1                | 7             |
| 2011 Colucci A <sup>33</sup>         | 1                                | 0           | 1               | 2                             | 0                                                       | 2                 | 1                | 7             |
| 2014 Pan XH <sup>62</sup>            | 1                                | 0           | 0               | 2                             | 0                                                       | 2                 | 1                | 6             |
| 2008 Kiertiburanakul S <sup>43</sup> | 1                                | 0           | 0               | 2                             | 0                                                       | 2                 | 0                | 5             |
| 2012 Saganic L <sup>26</sup>         | 1                                | 0           | 0               | 2                             | 0                                                       | 2                 | 1                | 6             |
| 2007 Delpierre C <sup>31</sup>       | 1                                | 0           | 0               | 2                             | 0                                                       | 2                 | 0                | 5             |
| 2010 Oliva J <sup>34</sup>           | 1                                | 0           | 0               | 2                             | 0                                                       | 2                 | 1                | 6             |
| 2009 Lemoh C <sup>8</sup>            | 1                                | 0           | 1               | 2                             | 0                                                       | 2                 | 1                | 7             |
| 2006 McDonald EA <sup>2</sup>        | 1                                | 0           | 0               | 2                             | 0                                                       | 2                 | 1                | 6             |
| 2010 Kivelä PS <sup>3</sup>          | 1                                | 0           | 0               | 2                             | 0                                                       | 2                 | 1                | 6             |
| 2012 Tey JSH <sup>13</sup>           | 1                                | 0           | 1               | 2                             | 0                                                       | 2                 | 1                | 7             |
| 2015 Valentini MB <sup>50</sup>      | 0                                | 0           | 0               | 2                             | 0                                                       | 2                 | 1                | 5             |
| 2009 Wohl AR <sup>21</sup>           | 1                                | 0           | 0               | 2                             | 0                                                       | 2                 | 1                | 6             |
| 2011 Ndiaye B <sup>16</sup>          | 1                                | 0           | 1               | 2                             | 0                                                       | 2                 | 1                | 7             |
| 2004 Manavi K <sup>18</sup>          | 1                                | 0           | 1               | 2                             | 0                                                       | 2                 | 1                | 7             |
| 2009 Carnicer-Pont D <sup>6</sup>    | 1                                | 0           | 0               | 2                             | 0                                                       | 2                 | 1                | 6             |
| 2018 Fakoya I <sup>66</sup>          | 1                                | 1           | 0               | 2                             | 0                                                       | 2                 | 1                | 7             |
| 2010 Lee JH <sup>24</sup>            | 1                                | 0           | 0               | 2                             | 0                                                       | 2                 | 1                | 6             |
| 2000 Girardi E <sup>4</sup>          | 1                                | 0           | 1               | 2                             | 0                                                       | 2                 | 1                | 7             |
| 2005 Longo B <sup>11</sup>           | 1                                | 0           | 1               | 2                             | 0                                                       | 2                 | 1                | 7             |
| 2016 Maquera-Afaray J <sup>19</sup>  | 1                                | 0           | 0               | 2                             | 0                                                       | 2                 | 1                | 6             |
| 2013 Hall HI <sup>53</sup>           | 1                                | 0           | 1               | 2                             | 0                                                       | 2                 | 0                | 6             |

**Table 2: Methodological quality assessment for surveillance and cross-sectional studies (continued)**

| Study                                 | Selection                        |             |                 |                               | Comparability based on design and analyses <sup>a</sup> | Outcome           |                  | Sum of scores |
|---------------------------------------|----------------------------------|-------------|-----------------|-------------------------------|---------------------------------------------------------|-------------------|------------------|---------------|
|                                       | Representativeness of the sample | Sample size | Non-respondents | Ascertainment of transmission |                                                         | Assessment of AHD | Statistical test |               |
| 2013 Hall HI <sup>53</sup>            | 1                                | 0           | 1               | 2                             | 0                                                       | 2                 | 0                | 6             |
| 2013 Hall HI <sup>53</sup>            | 1                                | 0           | 1               | 2                             | 0                                                       | 2                 | 0                | 6             |
| 2013 Hall HI <sup>53</sup>            | 1                                | 0           | 1               | 2                             | 0                                                       | 2                 | 0                | 6             |
| 2013 Hall HI <sup>53</sup>            | 1                                | 0           | 1               | 2                             | 0                                                       | 2                 | 0                | 6             |
| 2016 Kundro MA <sup>32</sup>          | 1                                | 0           | 0               | 2                             | 0                                                       | 2                 | 1                | 6             |
| 2002 Castilla J <sup>7</sup>          | 1                                | 0           | 0               | 2                             | 0                                                       | 2                 | 1                | 6             |
| 2013 Rurangirwa J <sup>22</sup>       | 1                                | 0           | 0               | 2                             | 0                                                       | 2                 | 1                | 6             |
| 2010 Yang BR <sup>25</sup>            | 1                                | 0           | 1               | 2                             | 0                                                       | 2                 | 1                | 7             |
| 2012 Dickson NP <sup>40</sup>         | 1                                | 0           | 0               | 2                             | 0                                                       | 2                 | 1                | 6             |
| 2017 Pyziak-Kowalska KA <sup>45</sup> | 1                                | 0           | 0               | 2                             | 0                                                       | 2                 | 1                | 6             |
| 2014 Oliva J <sup>48</sup>            | 1                                | 0           | 0               | 2                             | 0                                                       | 2                 | 1                | 6             |
| 2015 Dai SY <sup>52</sup>             | 1                                | 0           | 0               | 2                             | 0                                                       | 2                 | 0                | 5             |
| 2015 Jiang HB <sup>9</sup>            | 1                                | 0           | 1               | 2                             | 0                                                       | 2                 | 1                | 7             |
| 2003 Wong KH <sup>1</sup>             | 1                                | 0           | 1               | 2                             | 0                                                       | 2                 | 1                | 7             |
| 2011 Tang JJ <sup>23</sup>            | 1                                | 0           | 1               | 2                             | 0                                                       | 2                 | 1                | 7             |
| 2018 Li JZ <sup>60</sup>              | 1                                | 0           | 1               | 2                             | 0                                                       | 2                 | 1                | 7             |
| 2015 Qi Y <sup>57</sup>               | 1                                | 0           | 1               | 2                             | 0                                                       | 2                 | 1                | 7             |
| 2016 Jin X <sup>54</sup>              | 1                                | 0           | 1               | 2                             | 0                                                       | 2                 | 0                | 6             |
| 2016 Liu ZQ <sup>39</sup>             | 1                                | 0           | 1               | 2                             | 0                                                       | 2                 | 1                | 7             |
| 2016 Meng Q <sup>67</sup>             | 1                                | 0           | 1               | 2                             | 0                                                       | 2                 | 1                | 7             |
| 2017 Chen ZB <sup>69</sup>            | 1                                | 0           | 0               | 2                             | 0                                                       | 2                 | 1                | 6             |
| 2017 Guo Y <sup>59</sup>              | 1                                | 0           | 1               | 2                             | 0                                                       | 2                 | 1                | 7             |
| 2017 Li X <sup>65</sup>               | 1                                | 0           | 1               | 2                             | 0                                                       | 2                 | 1                | 7             |

**Table 2: Methodological quality assessment for surveillance and cross-sectional studies (continued)**

| study                           | Selection                        |             |                 | Ascertainment of transmission | Comparability based on design and analyses <sup>a</sup> | Outcome           |                  | Sum of scores |
|---------------------------------|----------------------------------|-------------|-----------------|-------------------------------|---------------------------------------------------------|-------------------|------------------|---------------|
|                                 | Representativeness of the sample | Sample size | Non-respondents |                               |                                                         | Assessment of AHD | Statistical test |               |
| 2017 Lin ZM <sup>56</sup>       | 1                                | 0           | 1               | 2                             | 0                                                       | 2                 | 1                | 7             |
| 2017 Mao LC <sup>46</sup>       | 1                                | 0           | 1               | 2                             | 0                                                       | 2                 | 1                | 7             |
| 2017 Sun L <sup>41</sup>        | 1                                | 0           | 0               | 2                             | 0                                                       | 2                 | 1                | 6             |
| 2017 Zhang NN <sup>42</sup>     | 1                                | 0           | 1               | 2                             | 0                                                       | 2                 | 1                | 7             |
| 2018 Li X <sup>30</sup>         | 0                                | 0           | 1               | 2                             | 0                                                       | 2                 | 1                | 6             |
| 2018 Zhang HL <sup>61</sup>     | 1                                | 0           | 1               | 2                             | 0                                                       | 2                 | 1                | 7             |
| 2014 Wilson K <sup>70</sup>     | 1                                | 0           | 0               | 2                             | 0                                                       | 2                 | 0                | 5             |
| 2019 Siwak E <sup>72</sup>      | 1                                | 0           | 1               | 2                             | 0                                                       | 2                 | 1                | 7             |
| 2006 Schwarcz S <sup>73</sup>   | 1                                | 0           | 1               | 2                             | 0                                                       | 2                 | 1                | 7             |
| 2010 Mena M <sup>74</sup>       | 1                                | 0           | 1               | 2                             | 0                                                       | 2                 | 0                | 6             |
| 2003 McDonald AM <sup>75</sup>  | 1                                | 0           | 1               | 2                             | 0                                                       | 2                 | 1                | 7             |
| 2019 Hu X <sup>78</sup>         | 1                                | 0           | 1               | 2                             | 0                                                       | 2                 | 1                | 7             |
| 2001 de Munain JL <sup>79</sup> | 0                                | 0           | 1               | 2                             | 0                                                       | 2                 | 0                | 5             |
| 2009 Chen KT <sup>80</sup>      | 1                                | 0           | 1               | 2                             | 0                                                       | 2                 | 0                | 6             |
| 2009 Shouse RL <sup>81</sup>    | 1                                | 0           | 1               | 2                             | 0                                                       | 2                 | 0                | 6             |
| 2006 Castilla J <sup>82</sup>   | 1                                | 0           | 0               | 2                             | 0                                                       | 2                 | 1                | 6             |
| 2005 Brannstrom J <sup>84</sup> | 1                                | 0           | 1               | 2                             | 0                                                       | 2                 | 0                | 6             |
| 2019 Luo TF <sup>85</sup>       | 1                                | 0           | 1               | 2                             | 0                                                       | 2                 | 1                | 7             |
| 2018 Chen LY <sup>86</sup>      | 1                                | 0           | 1               | 2                             | 0                                                       | 2                 | 1                | 7             |
| 2019 Zhang M <sup>87</sup>      | 1                                | 0           | 1               | 2                             | 0                                                       | 2                 | 1                | 7             |
| 2018 Liang HM <sup>88</sup>     | 1                                | 0           | 0               | 2                             | 0                                                       | 2                 | 1                | 6             |
| 2018 Xie H <sup>89</sup>        | 1                                | 0           | 1               | 2                             | 0                                                       | 2                 | 1                | 7             |
| 2018 Tang H <sup>90</sup>       | 0                                | 0           | 1               | 2                             | 0                                                       | 2                 | 1                | 6             |

**Table 2: Methodological quality assessment for surveillance and cross-sectional studies (continued)**

| study                        | Selection                        |             |                 | Ascertainment of transmission | Comparability based on design and analyses <sup>a</sup> | Outcome           |                  | Sum of scores |
|------------------------------|----------------------------------|-------------|-----------------|-------------------------------|---------------------------------------------------------|-------------------|------------------|---------------|
|                              | Representativeness of the sample | Sample size | Non-respondents |                               |                                                         | Assessment of AHD | Statistical test |               |
| 2019 Yang K <sup>91</sup>    | 1                                | 0           | 0               | 2                             | 0                                                       | 2                 | 1                | 6             |
| 2019 Xu Y <sup>92</sup>      | 1                                | 0           | 1               | 2                             | 0                                                       | 2                 | 1                | 7             |
| 2018 Huang YL <sup>93</sup>  | 1                                | 0           | 0               | 2                             | 0                                                       | 2                 | 1                | 6             |
| 2019 Yang ZK <sup>94</sup>   | 1                                | 0           | 1               | 2                             | 0                                                       | 2                 | 1                | 7             |
| 2019 Duan ZR <sup>95</sup>   | 1                                | 0           | 1               | 2                             | 0                                                       | 2                 | 1                | 7             |
| 2018 Bing PF <sup>96</sup>   | 1                                | 0           | 0               | 2                             | 0                                                       | 2                 | 1                | 6             |
| 2018 Xu QS <sup>97</sup>     | 1                                | 0           | 1               | 2                             | 0                                                       | 2                 | 1                | 7             |
| 2019 Zhang ZH <sup>98</sup>  | 1                                | 0           | 1               | 2                             | 0                                                       | 2                 | 1                | 7             |
| 2018 Ye L <sup>99</sup>      | 1                                | 0           | 1               | 2                             | 0                                                       | 2                 | 1                | 7             |
| 2019 Zhu Y <sup>100</sup>    | 1                                | 0           | 1               | 2                             | 0                                                       | 2                 | 1                | 7             |
| 2018 Huang SZ <sup>101</sup> | 1                                | 0           | 1               | 2                             | 0                                                       | 2                 | 1                | 7             |

A total of 76 articles were included.

a: Because we extracted the crude data, the item, **Comparability based on design and analyses**, was scored as 0 for all the cross-sectional and surveillance study.

Methodological quality assessment scale:

Very Good Studies: 9-10 points

Good Studies: 7-8 points

Satisfactory Studies: 5-6 points

Unsatisfactory Studies: 0 to 4 points

3.3 Table 3: Methodological quality assessment for cohort studies

| Study                                  | Selection                   |                                        |                               |                                                                    | Comparability <sup>b</sup> | Outcome           |                                                          |                                               | Sum of Score |
|----------------------------------------|-----------------------------|----------------------------------------|-------------------------------|--------------------------------------------------------------------|----------------------------|-------------------|----------------------------------------------------------|-----------------------------------------------|--------------|
|                                        | Representativeness of PLHIV | Selection of other transmission routes | Ascertainment of transmission | Outcome of interest was not present at start of study <sup>a</sup> |                            | Assessment of AHD | Follow-up long enough for outcomes to occur <sup>c</sup> | Adequacy of follow-up of cohorts <sup>d</sup> |              |
| 2018 Lee CY <sup>17</sup>              | 1                           | 1                                      | 1                             | 0                                                                  | 0                          | 1                 | 0                                                        | 0                                             | 4            |
| 2013 Spornraft-Ragaller P <sup>5</sup> | 0                           | 1                                      | 1                             | 0                                                                  | 0                          | 1                 | 0                                                        | 0                                             | 3            |
| 2009 Sobrino-Vegas P <sup>37</sup>     | 1                           | 1                                      | 1                             | 0                                                                  | 0                          | 1                 | 0                                                        | 0                                             | 4            |
| 2007 Teira Cobo R <sup>15</sup>        | 1                           | 1                                      | 1                             | 0                                                                  | 0                          | 1                 | 0                                                        | 0                                             | 4            |
| 2017 Senard O <sup>63</sup>            | 0                           | 1                                      | 1                             | 0                                                                  | 0                          | 1                 | 0                                                        | 0                                             | 3            |
| 2016 Op De Coul ELM <sup>14</sup>      | 1                           | 1                                      | 1                             | 0                                                                  | 0                          | 1                 | 0                                                        | 0                                             | 4            |
| 2006 Delpierre C <sup>12</sup>         | 1                           | 1                                      | 1                             | 0                                                                  | 0                          | 1                 | 0                                                        | 0                                             | 4            |
| 2011 Leutscher PDC <sup>35</sup>       | 1                           | 1                                      | 1                             | 0                                                                  | 0                          | 1                 | 0                                                        | 0                                             | 4            |
| 2016 Sobrino-Vegas P <sup>38</sup>     | 1                           | 1                                      | 1                             | 0                                                                  | 0                          | 1                 | 0                                                        | 0                                             | 4            |
| 2011 Lo YC <sup>44</sup>               | 0                           | 1                                      | 1                             | 0                                                                  | 0                          | 1                 | 0                                                        | 0                                             | 3            |
| 2014 Trepka MJ <sup>47</sup>           | 1                           | 1                                      | 1                             | 0                                                                  | 0                          | 1                 | 0                                                        | 0                                             | 4            |
| 2016 Tossas-Milligan KY <sup>27</sup>  | 0                           | 1                                      | 1                             | 0                                                                  | 0                          | 1                 | 0                                                        | 0                                             | 3            |
| 2016 Jeong SJ <sup>36</sup>            | 1                           | 1                                      | 1                             | 0                                                                  | 0                          | 1                 | 0                                                        | 0                                             | 4            |
| 2017 Chkhartishvili N <sup>64</sup>    | 1                           | 1                                      | 1                             | 0                                                                  | 0                          | 1                 | 0                                                        | 0                                             | 4            |
| 2012 Helleberg M <sup>10</sup>         | 1                           | 1                                      | 1                             | 0                                                                  | 0                          | 1                 | 0                                                        | 0                                             | 4            |
| 2016 Levy I <sup>55</sup>              | 0                           | 1                                      | 1                             | 0                                                                  | 0                          | 1                 | 0                                                        | 0                                             | 3            |
| 2017 Cuzin L <sup>68</sup>             | 1                           | 1                                      | 1                             | 0                                                                  | 0                          | 1                 | 0                                                        | 0                                             | 4            |
| 2012 Bai F <sup>49</sup>               | 0                           | 1                                      | 1                             | 0                                                                  | 0                          | 1                 | 0                                                        | 0                                             | 3            |
| 2013 Mcroft A <sup>28</sup>            | 1                           | 1                                      | 1                             | 0                                                                  | 0                          | 1                 | 0                                                        | 0                                             | 4            |
| 2009 Duffus WA <sup>29</sup>           | 1                           | 1                                      | 1                             | 0                                                                  | 0                          | 1                 | 0                                                        | 0                                             | 4            |
| 2015 Wright ST <sup>20</sup>           | 1                           | 1                                      | 1                             | 0                                                                  | 0                          | 1                 | 0                                                        | 0                                             | 4            |



**Table 3: Methodological quality assessment for cohort studies (continued)**

| Study                          | Selection                   |                                        |                               | Outcome of interest was not present at start of study <sup>a</sup> | Comparability <sup>b</sup> | Outcome           |                                                          |                                               | Sum of Score |
|--------------------------------|-----------------------------|----------------------------------------|-------------------------------|--------------------------------------------------------------------|----------------------------|-------------------|----------------------------------------------------------|-----------------------------------------------|--------------|
|                                | Representativeness of PLHIV | Selection of other transmission routes | Ascertainment of transmission |                                                                    |                            | Assessment of AHD | Follow-up long enough for outcomes to occur <sup>c</sup> | Adequacy of follow-up of cohorts <sup>d</sup> |              |
| 2012 Toure A <sup>71</sup>     | 1                           | 1                                      | 1                             | 0                                                                  | 0                          | 1                 | 0                                                        | 0                                             | 4            |
| 2019 Lim CL <sup>76</sup>      | 1                           | 1                                      | 1                             | 0                                                                  | 0                          | 1                 | 0                                                        | 0                                             | 4            |
| 2007 Lanoy E <sup>77</sup>     | 1                           | 1                                      | 1                             | 0                                                                  | 0                          | 1                 | 0                                                        | 0                                             | 4            |
| 2016 Reinhardt S <sup>83</sup> | 0                           | 1                                      | 1                             | 0                                                                  | 0                          | 1                 | 0                                                        | 0                                             | 3            |

A total of 25 articles were included.

a, c, d: Because we extracted the baseline information of cohort studies, the items, ‘**Outcome of interest was not present at start of study**’, ‘**Follow-up long enough for outcomes to occur**’ and ‘**Adequacy of follow-up of cohorts**’ were scored as 0 for all the cohort study.

b: Because we extracted the crude data, the item, **Comparability**, was scored as 0 for all the cohort study.

Methodological quality assessment scale:

Good quality: 3 or 4 scores in selection domain AND 1 or 2 scores in comparability domain AND 2 or 3 scores in outcome domain

Fair quality: 2 scores in selection domain AND 1 or 2 scores in comparability domain AND 2 or 3 scores in outcome domain

Poor quality: 0 or 1 score in selection domain OR 0 scores in comparability domain OR 0 or 1 score in outcome domain

**Appendix A4 (Assessment of data convergence)**

**4.1 Figure 1: Trace plot and density plot**

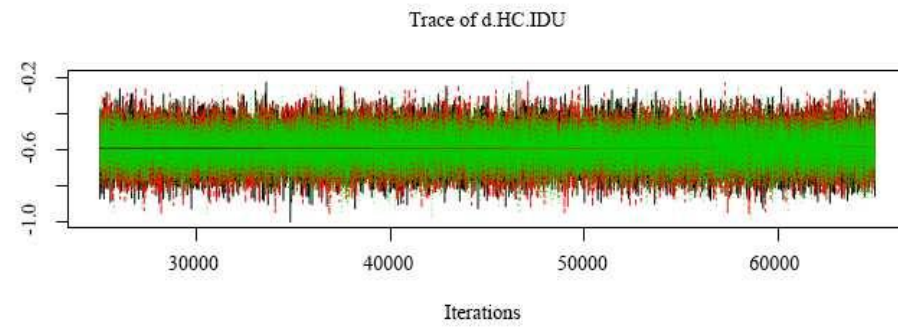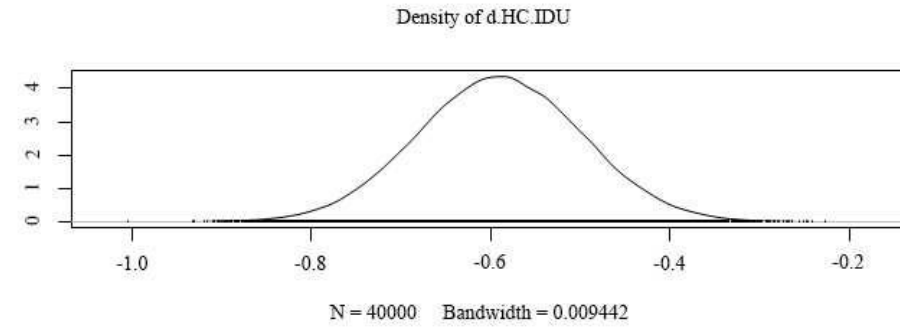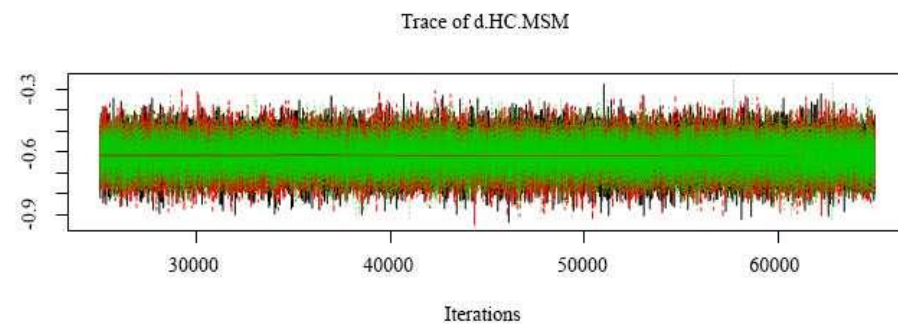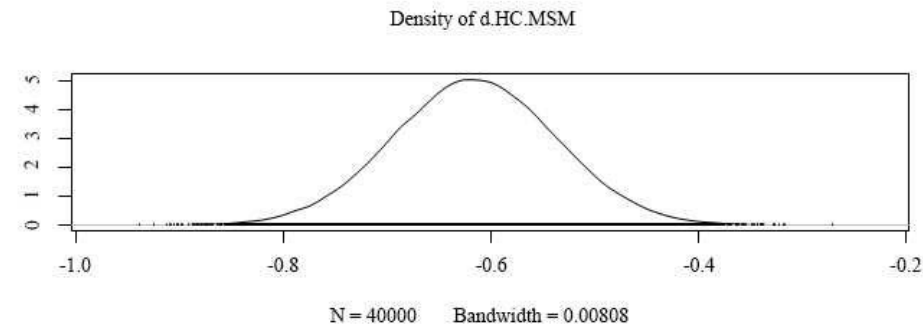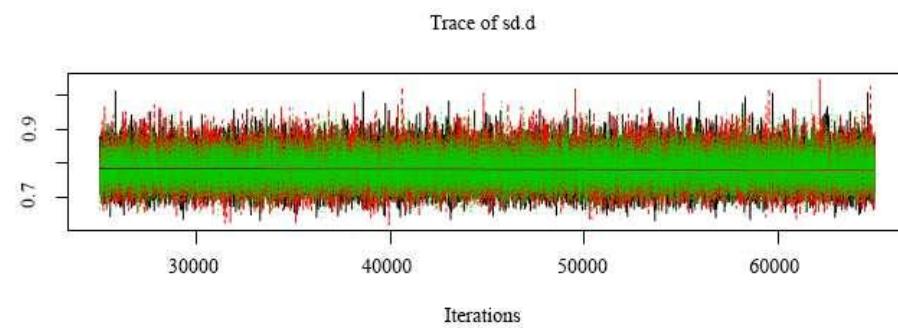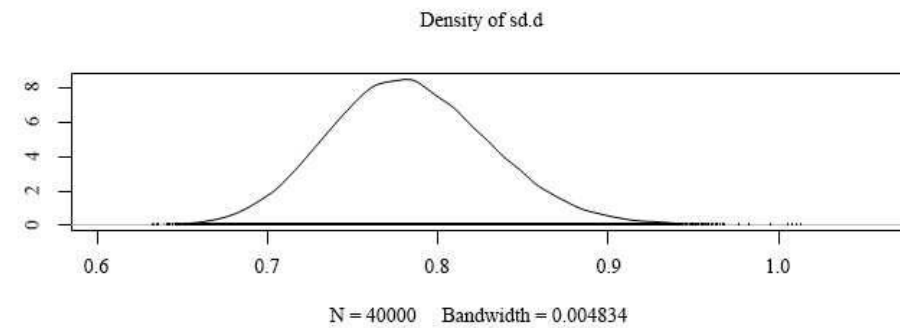

4.2 Figure 2: Gelman-Rubin-Brooks plot

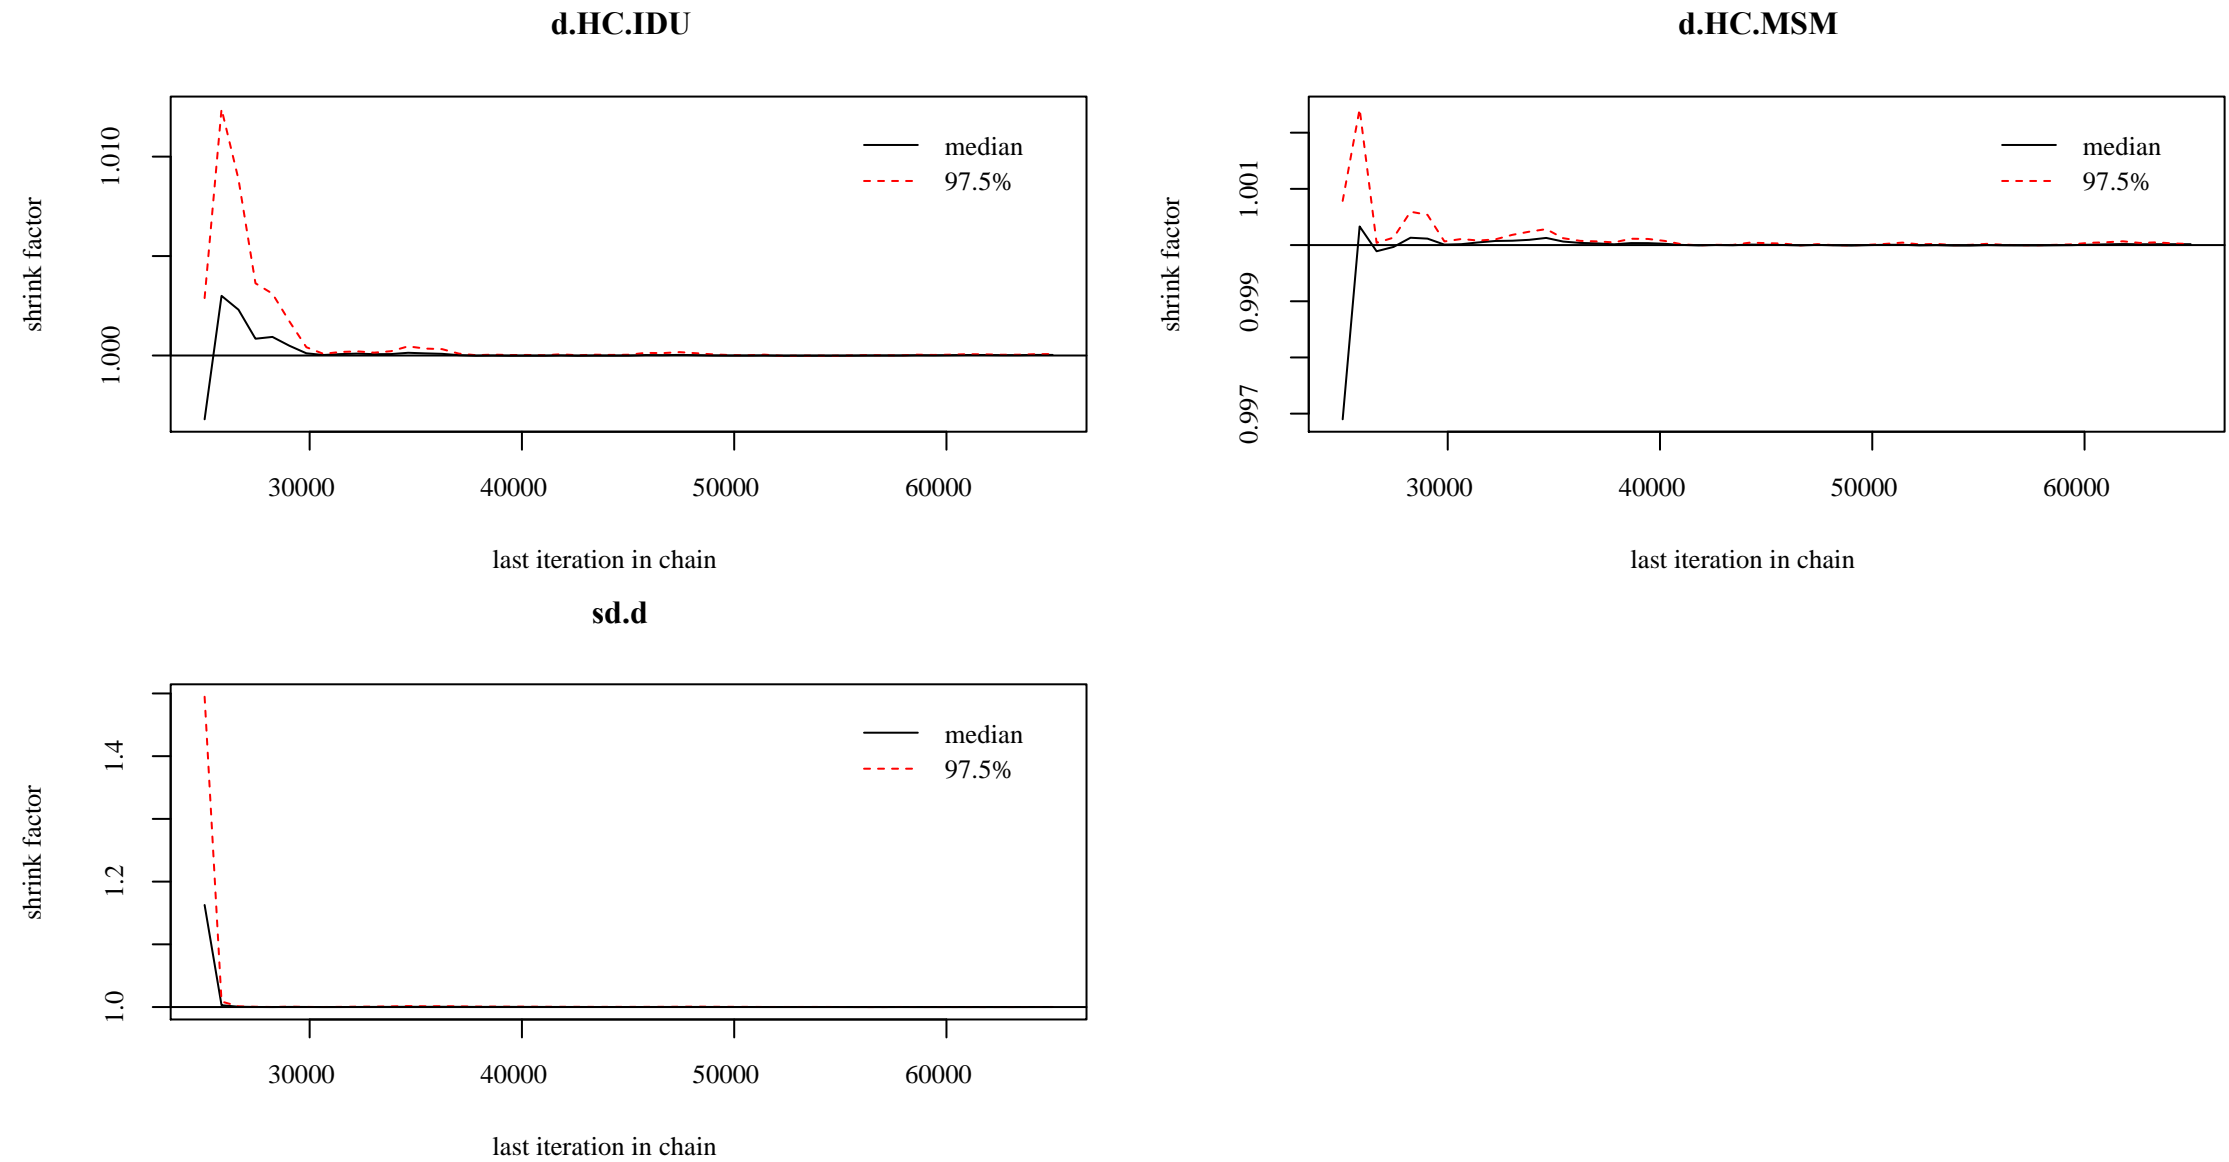

**Appendix A5 (Network plot, heterogeneity and sensitivity analyses including high-quality studies)**

**5.1 Figure 1: Network plot and Bayesian network meta-analysis estimates<sup>a</sup>**

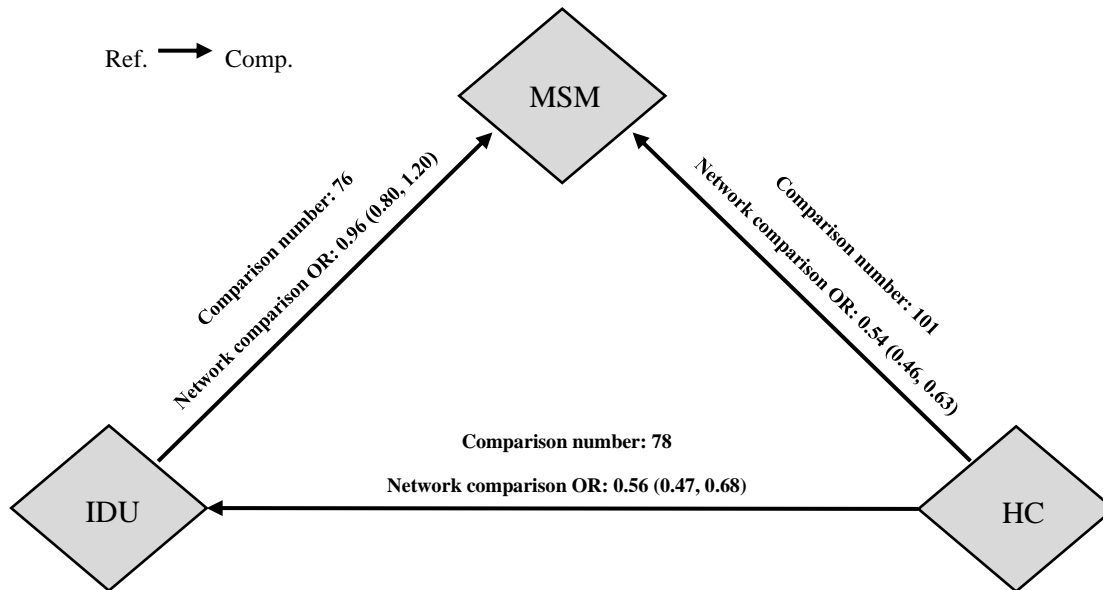

For each comparison, the arrowhead points from the reference group (ref.) to the comparison group (comp.). Summaries of odds ratio (OR) and its 95% credible interval (CrI) for advanced HIV disease in network comparison, as well as the number of comparisons, are demonstrated along with the arrows.

a: Network Meta-analysis including all the study.

**5.2 Table 1: Assessment of heterogeneity including all the study**

|     |     | Pair-wise I <sup>2</sup> | Network I <sup>2</sup> |
|-----|-----|--------------------------|------------------------|
| IDU | HC  | 98.6%                    | 98.5%                  |
| MSM | HC  | 98.6%                    | 98.6%                  |
| MSM | IDU | 98.3%                    | 98.3%                  |

5.3 Figure 2: Network plot and Bayesian network meta-analysis estimates including high-quality studies<sup>a</sup>

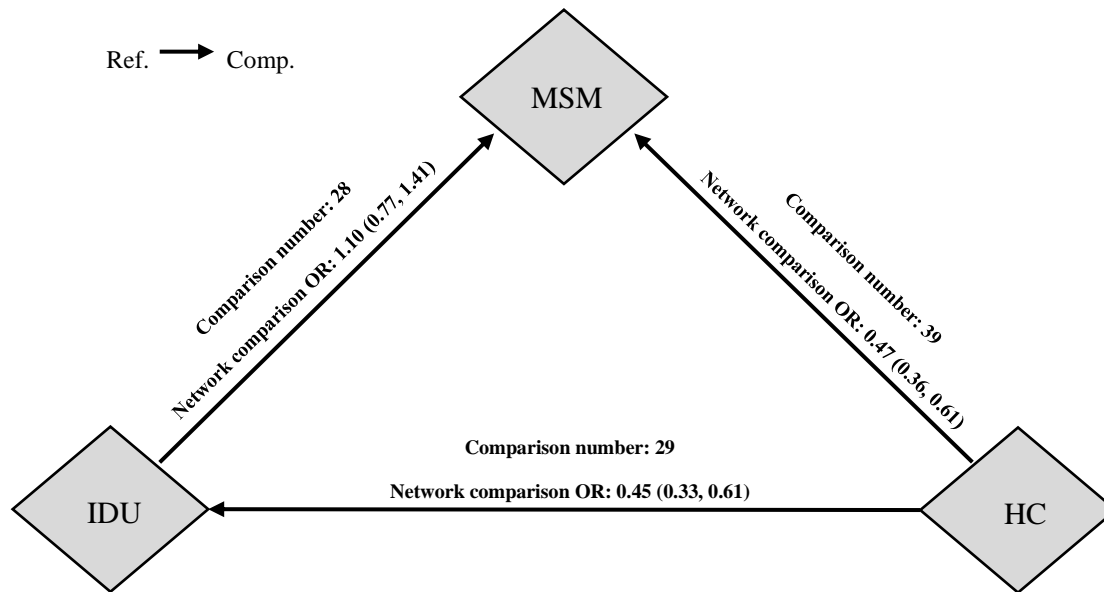

For each comparison, the arrowhead points from the reference group (ref.) to the comparison group (comp.). Summaries of odds ratio (OR) and its 95% credible interval (CrI) for advanced HIV disease network comparison, as well as the number of comparisons, are demonstrated along with the arrows

a: A total of 40 studies were included in the Network Meta-analyses covering cross-sectional studies assess as good or very good quality and cohort studies evaluated as good quality. However, no cohort study was evaluated as good quality.

Appendix A6 (Funnel plot to assess the publication bias)

6.1 Figure 1: Conventional funnel plot with Y-axis of standard error

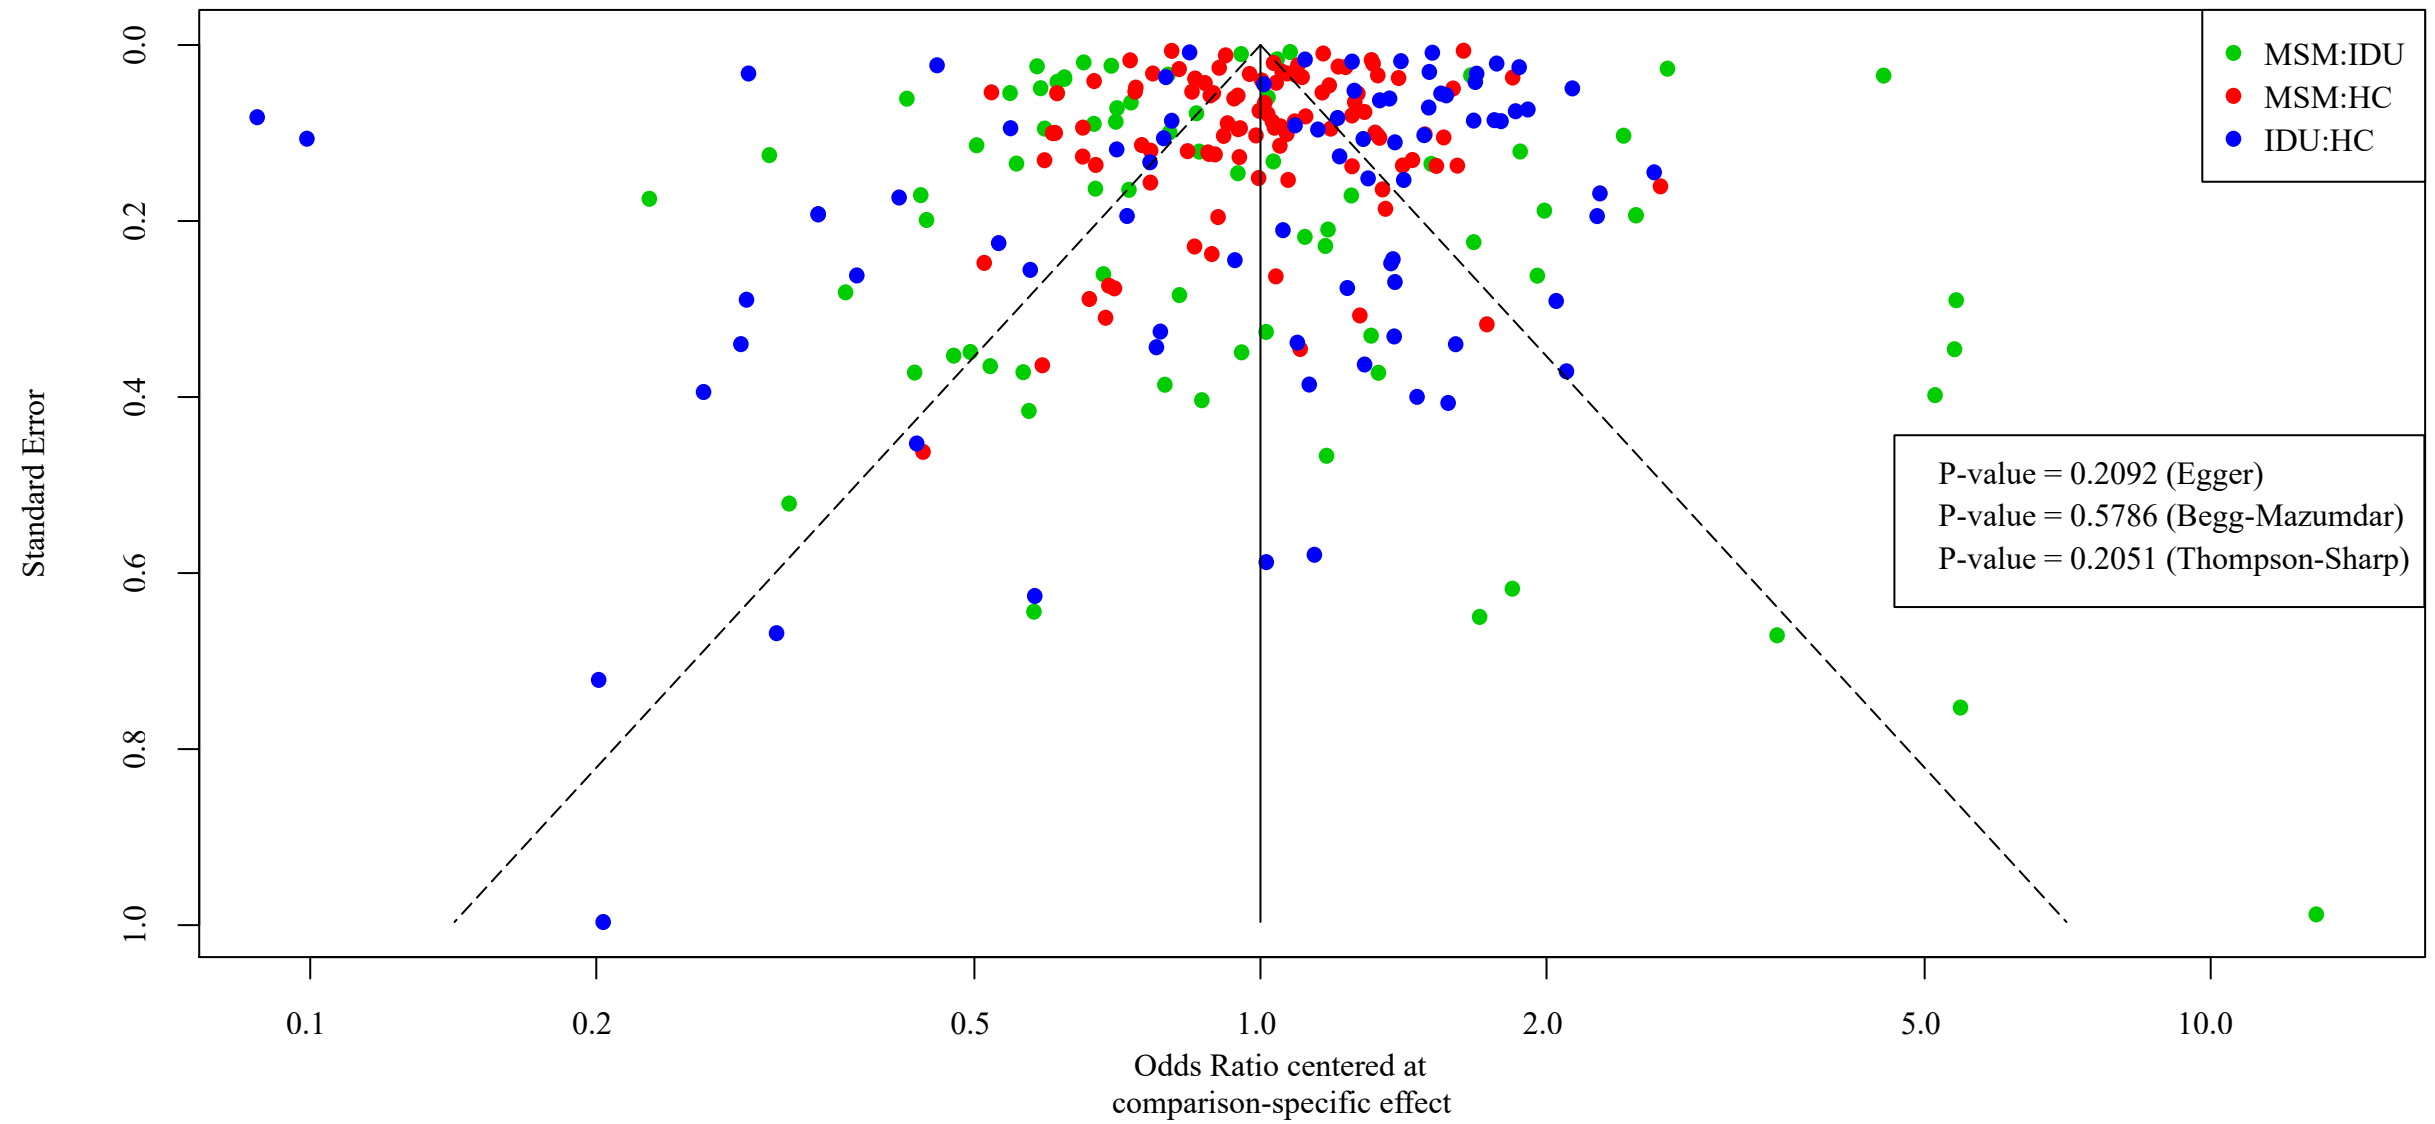

6.2 Figure 2: Conventional funnel plot with Y-axis of inverse of standard error

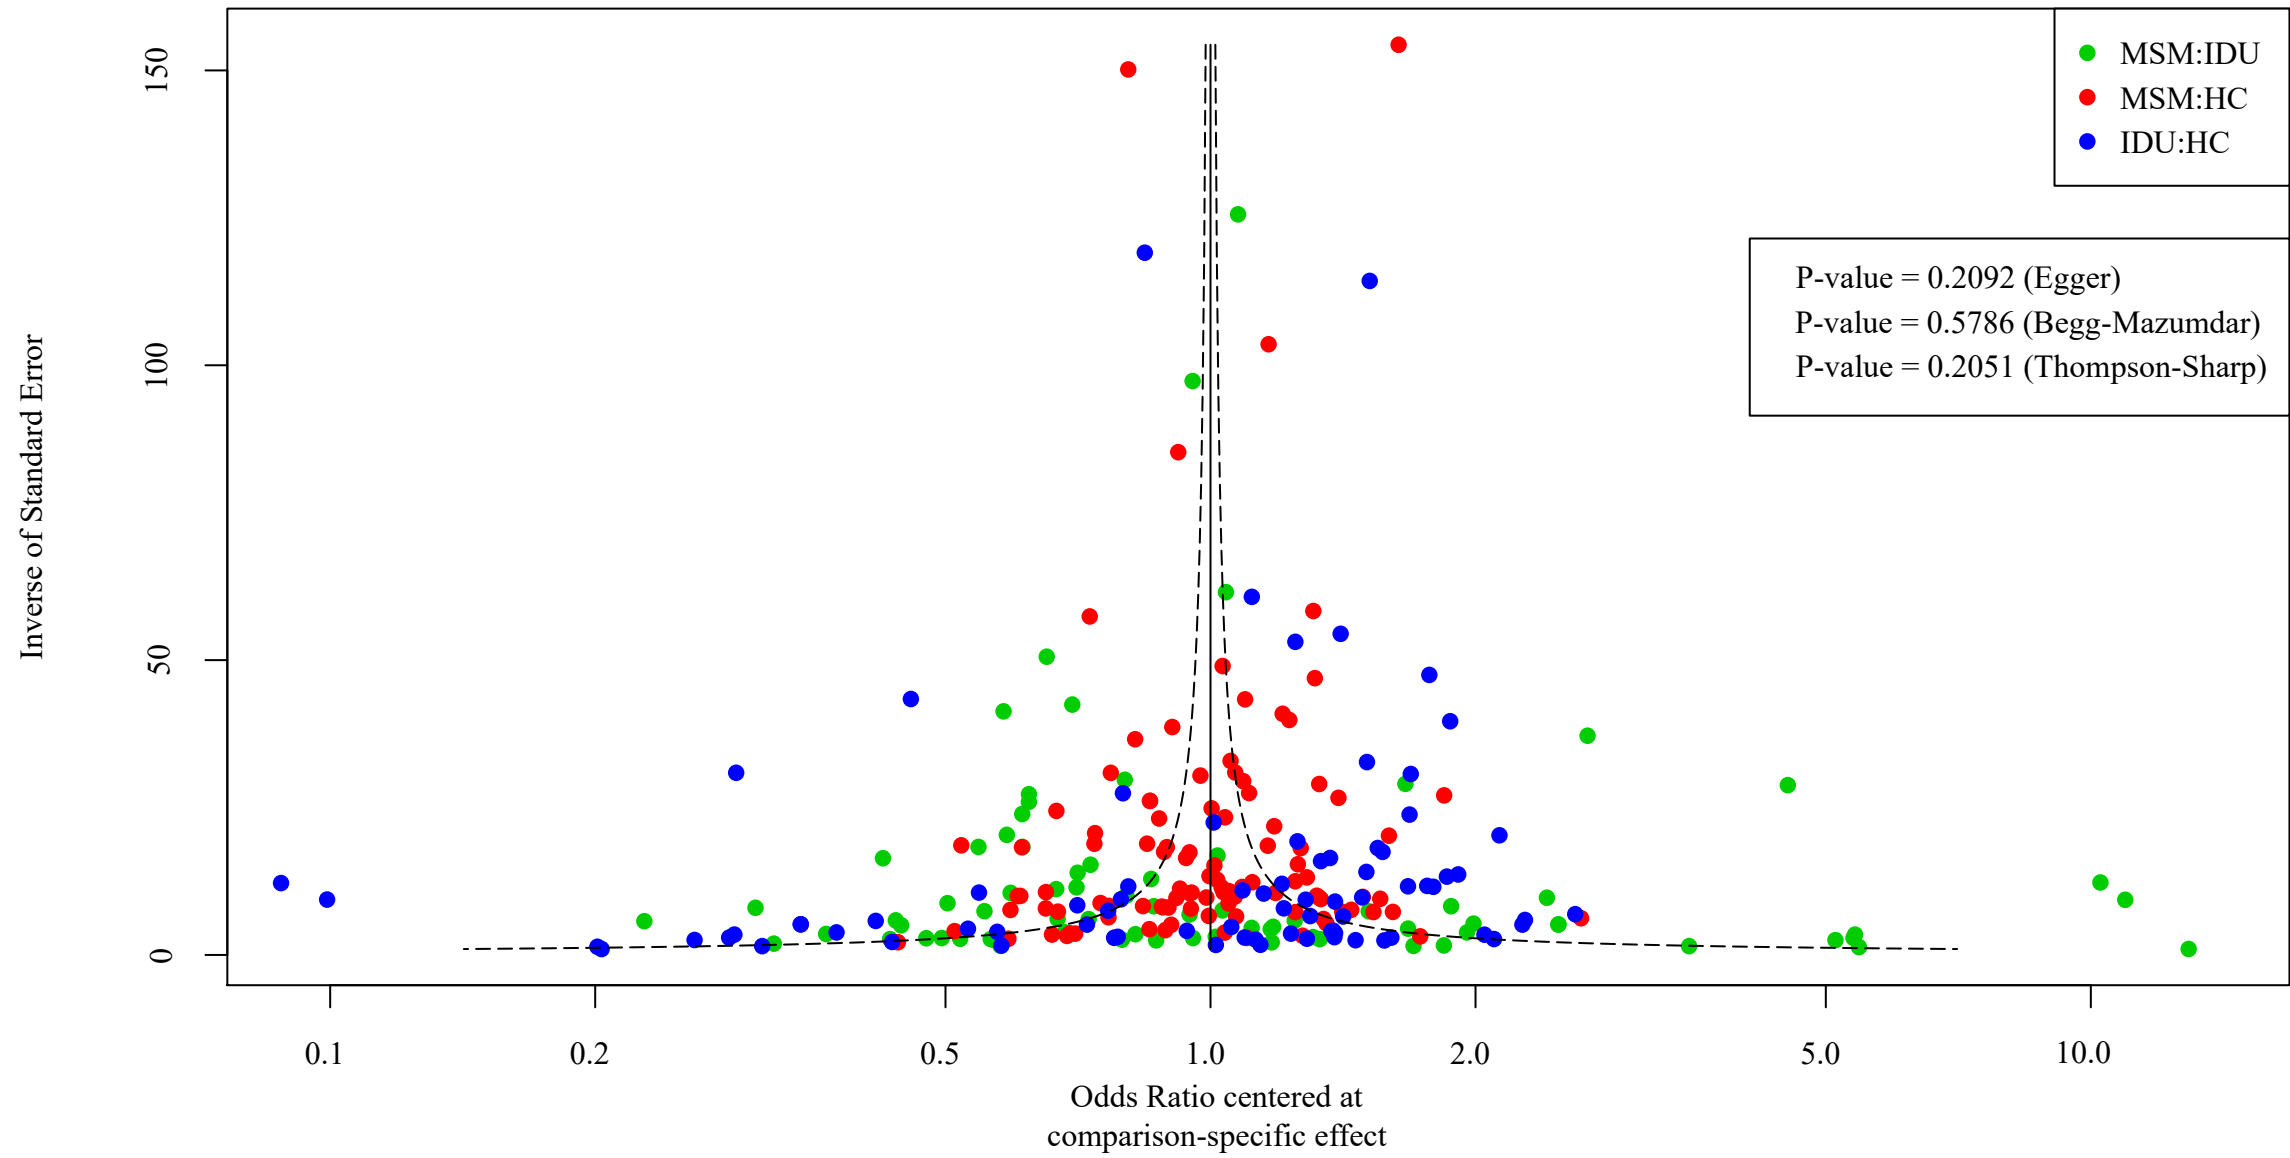



6.3 Figure 3: Contour-enhanced funnel plot with Y-axis of standard error

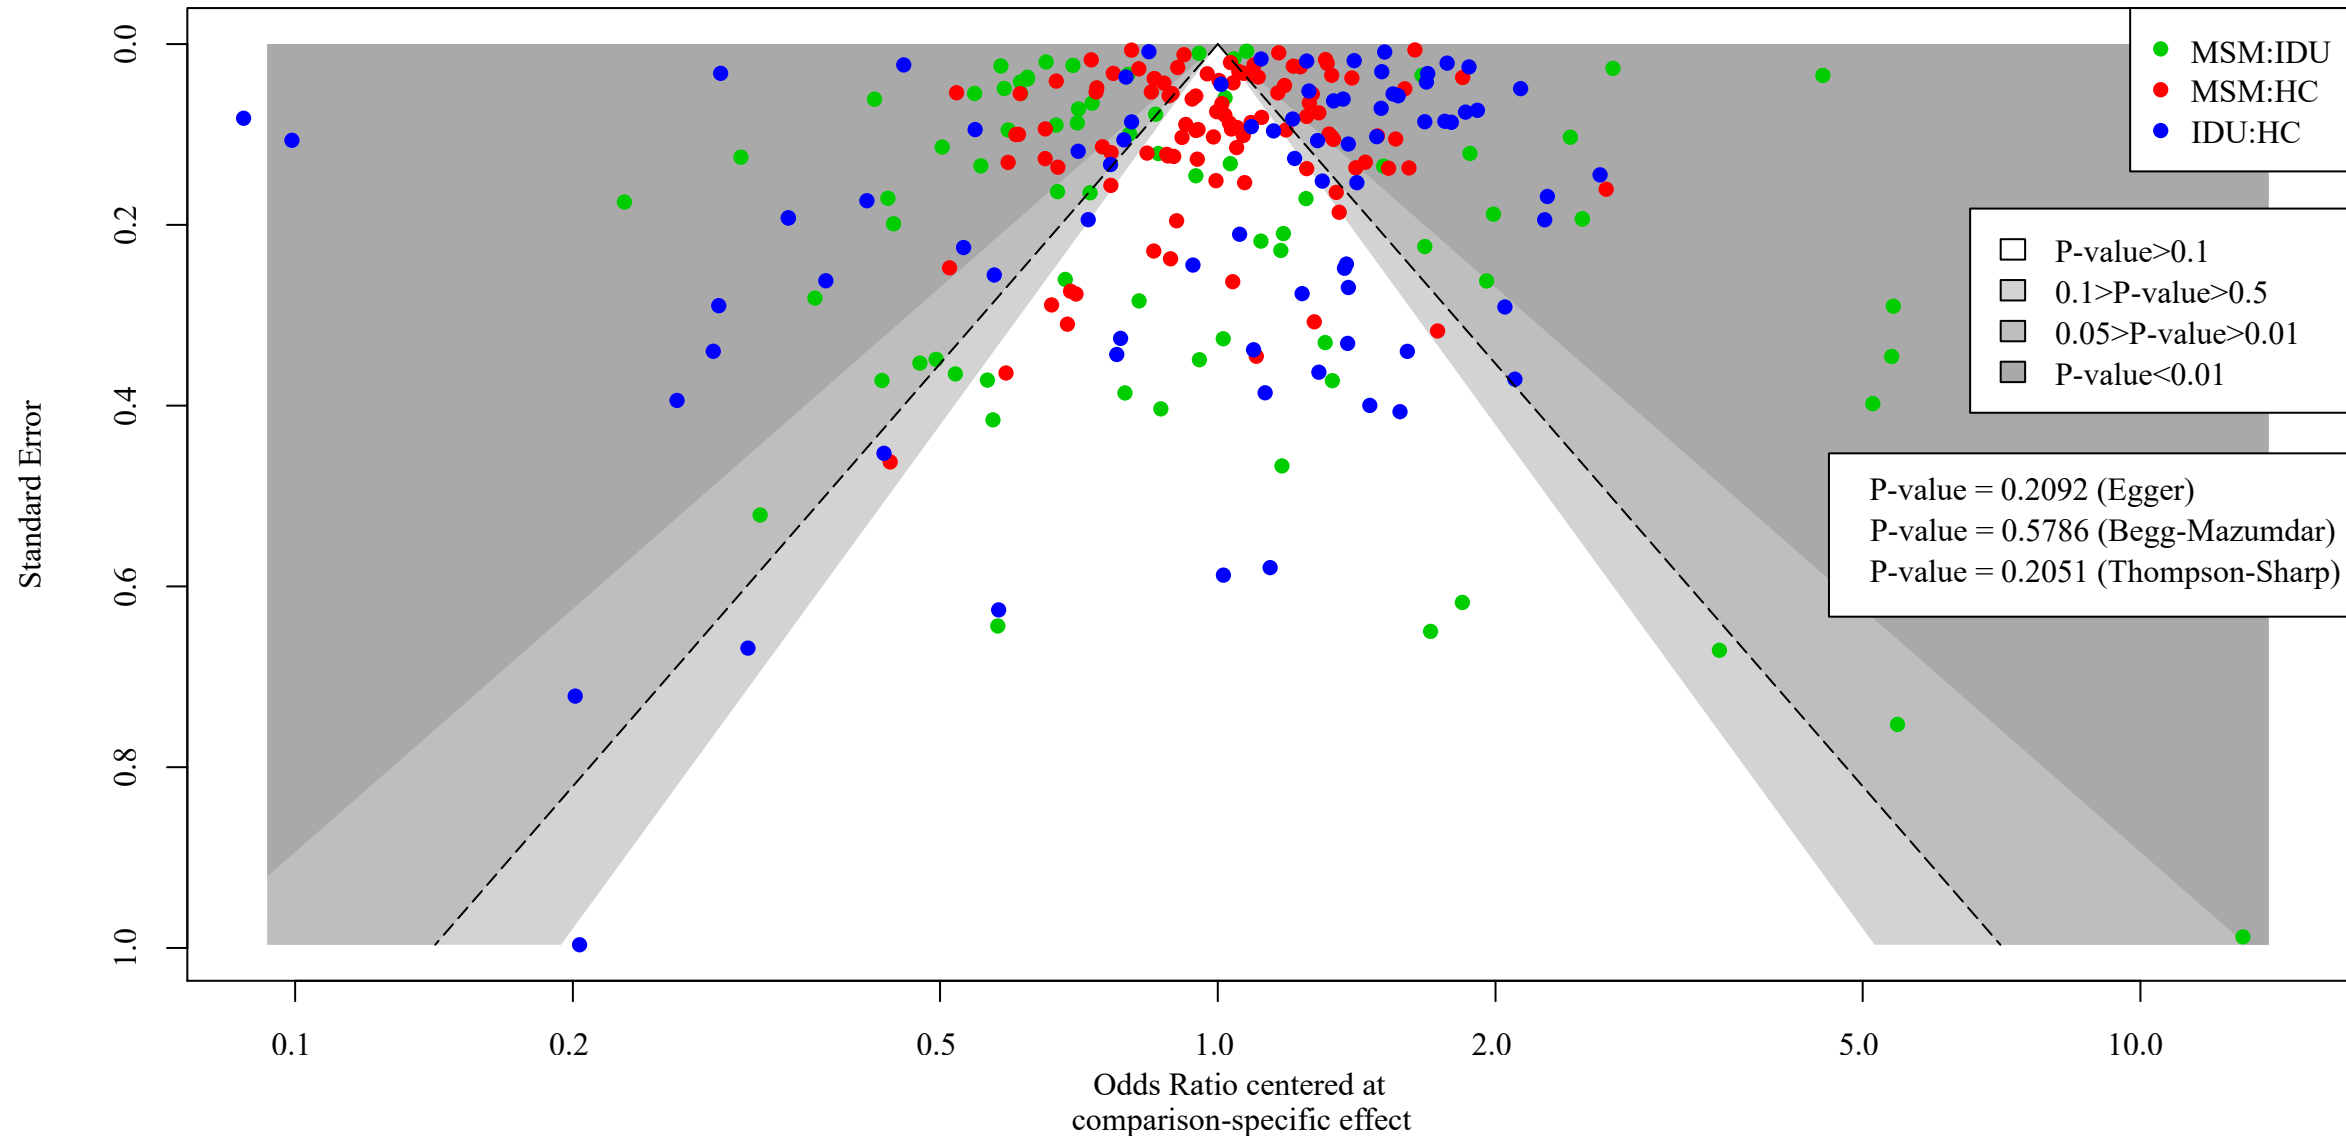

6.4 Figure 4: Contour-enhanced funnel plot with Y-axis of inverse of standard error

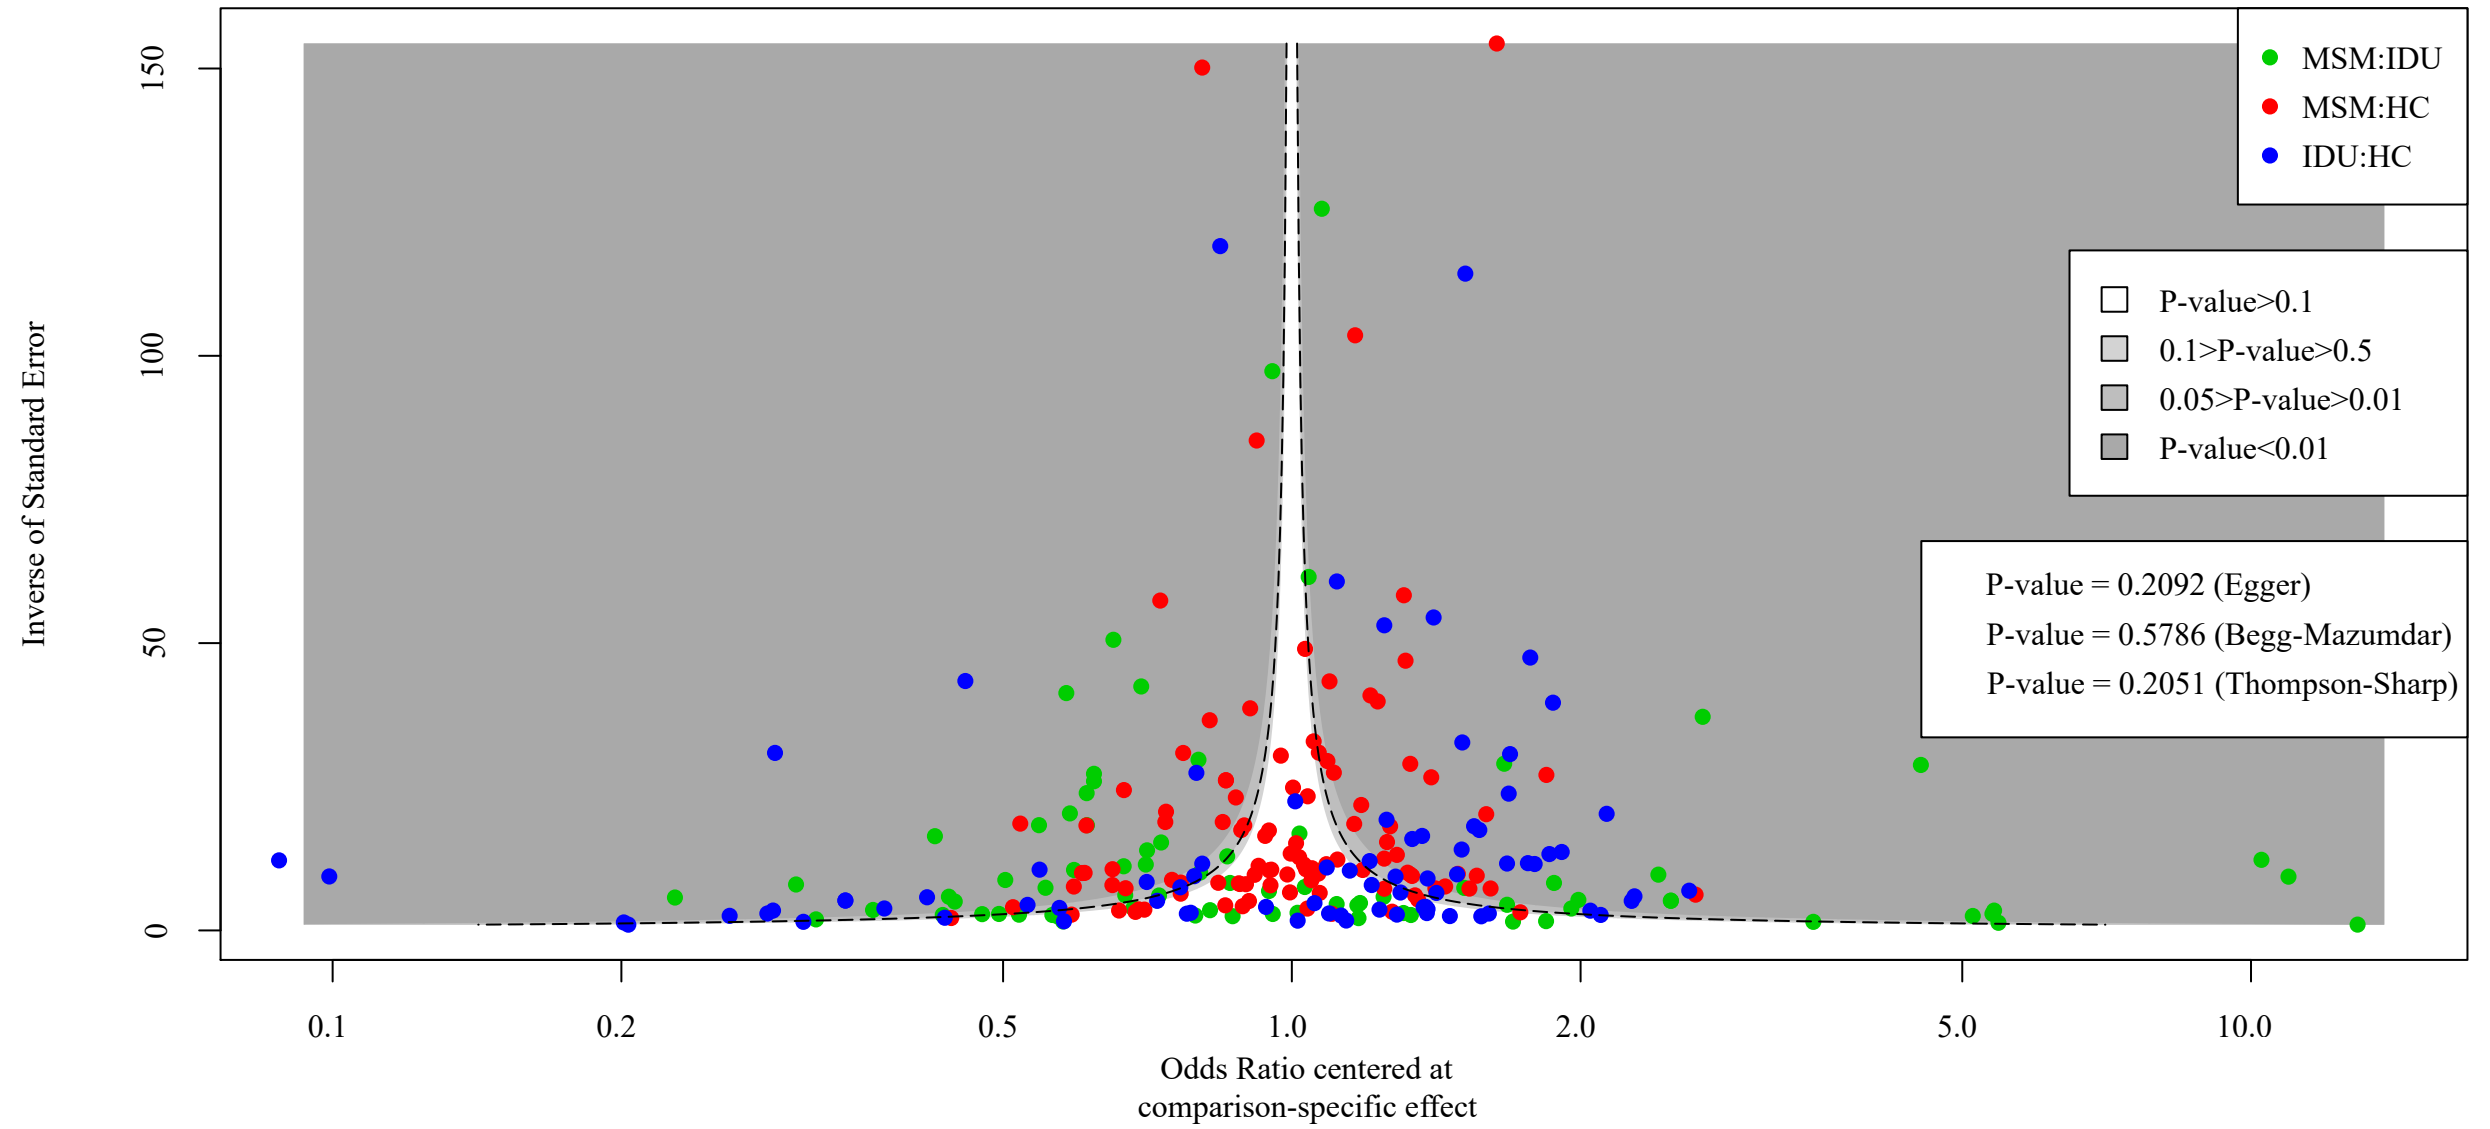

### 6.5 Explanation of conventional/contour-enhanced funnel plot

Many causes, such as publication bias and heterogeneity, would lead to the asymmetry of the funnel plot<sup>a</sup>. Although the symmetrical conventional funnel plot could indicate little risk of publication bias in the meta-analysis, it is difficult to tell the source of bias when a conventional funnel plot is asymmetrical. Hence, it is valuable to introduce another graph, Contour-enhanced funnel plot, to diagnose the asymmetry of funnel plots.

For contour-enhanced funnel plots<sup>b</sup>:

- (1) If the dots are located **symmetrically** in the white area of nonstatistical significance ( $P\text{-value}>0.1$ ), the meta-analysis will have little risk of publication bias.
- (2) If the dots are located **asymmetrically** in the white area of nonstatistical significance ( $P\text{-value}>0.1$ ), the meta-analysis will face the risk of publication bias rather than other bias like heterogeneity.
- (3) If the dots are located **symmetrically** in the white area of nonstatistical significance ( $P\text{-value}>0.1$ ) but **asymmetrically** in the dark grey area of statistical significance ( $P\text{-value}<0.01$ ), in this case, it is necessary to worry about the heterogeneity instead of publication bias. In other words, there is little risk of publication bias but the heterogeneity should be paid attention.

In this study, we could see that the dots are located symmetrically in the white area of nonstatistical significance ( $P\text{-value}>0.1$ ) but **asymmetrically** in the dark grey area of statistical significance ( $P\text{-value}<0.01$ ). Additionally, the statistical tests based on Egger/Begg-Mazumdar/Thompson-Sharp method were conducted respectively, showing that accepting the null hypothesis of no publication bias consistently. Thus, we consider that the meta-analysis has little risk of publication bias but faces the heterogeneity.

#### Reference:

- a. Dekkers OM, Vandenbroucke JP, Cevallos M, Renehan AG, Altman DG, Egger M. COSMOS-E: Guidance on conducting systematic reviews and meta-analyses of observational studies of etiology. *PLoS medicine* 2019; 16(2): e1002742.
- b. Peters JL, Sutton AJ, Jones DR, Abrams KR, Rushton L. Contour-enhanced meta-analysis funnel plots help distinguish publication bias from other causes of asymmetry. *Journal of clinical epidemiology* 2008; 61(10): 991-6.

**Appendix A7 (SUCRA)**

**7.1 Figure 1: The surface under the cumulative ranking curve (SUCRA)**

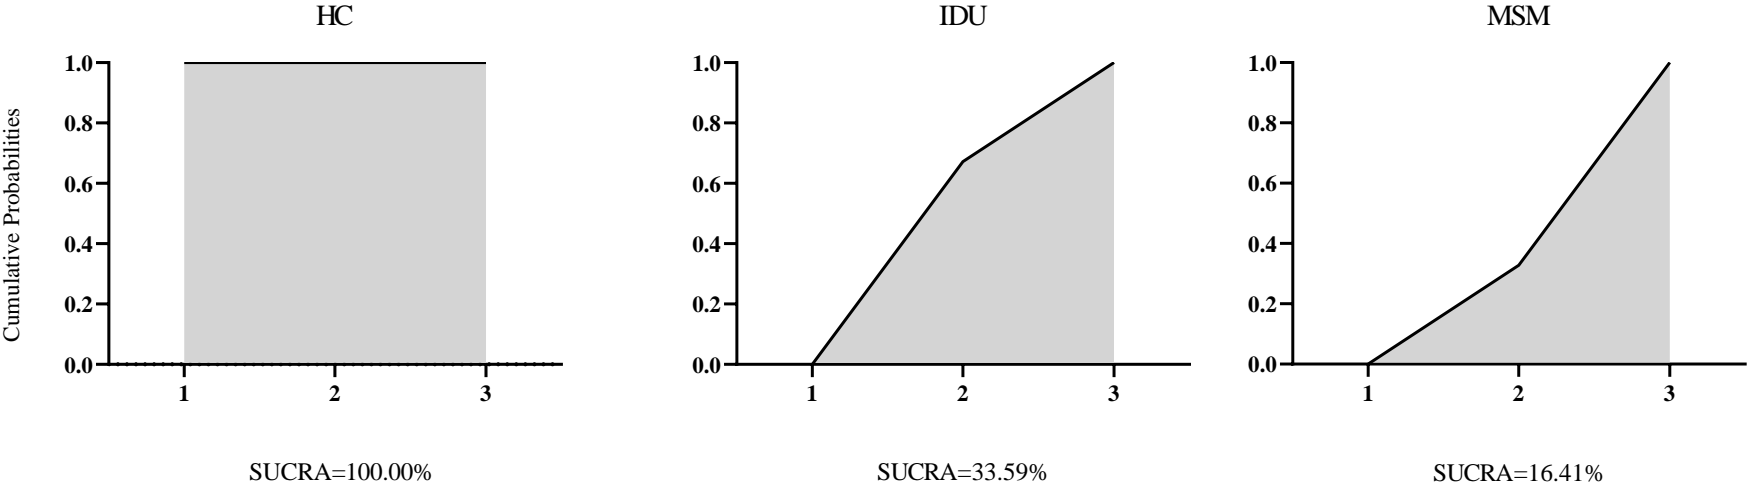

## Appendix A8 (Subgroup analysis of network meta-analysis)

### 8.1 Continent results

#### (1) Asia (48 studies included)

##### 1) Network results

8.1.1.1 Table 1 Network results of AHD risk among MSM, IDU, and HC in Asia

|           | MSM               | IDU               | HC |
|-----------|-------------------|-------------------|----|
| MSM (ref) | 1                 |                   |    |
| IDU (ref) | 0.99 (0.72, 1.40) | 1                 |    |
| HC (ref)  | 0.47 (0.36, 0.62) | 0.52 (0.38, 0.72) | 1  |

##### 2) Assessment of heterogeneity

8.1.1.2 Table 2 Assessment of heterogeneity in Asian studies

|     |     | Pair-wise I <sup>2</sup> | Network I <sup>2</sup> |
|-----|-----|--------------------------|------------------------|
| IDU | HC  | 97.7%                    | 97.6%                  |
| MSM | HC  | 94.7%                    | 94.8%                  |
| MSM | IDU | 97.7%                    | 97.6%                  |

##### 3) SUCRA

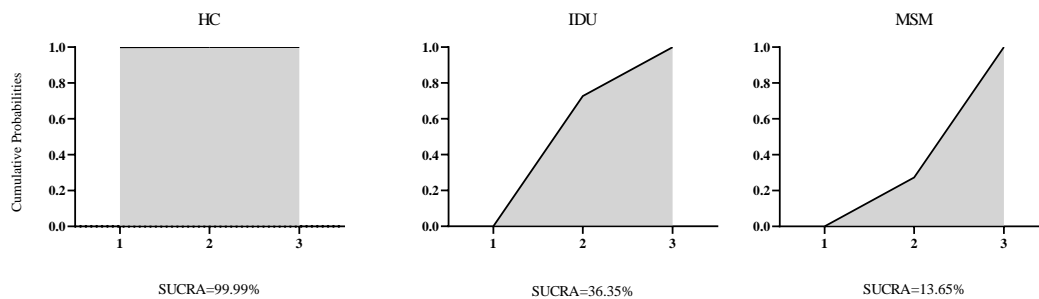

(2) *Europe (35 studies included)*

1) *Network results*

8.1.2.1 *Table 1 Network results of AHD risk among MSM, IDU, and HC in Europe*

|           |                   |                   |    |
|-----------|-------------------|-------------------|----|
|           | MSM               | IDU               | HC |
| MSM (ref) | 1                 |                   |    |
| IDU (ref) | 1.10 (0.81, 1.50) | 1                 |    |
| HC (ref)  | 0.54 (0.40, 0.73) | 0.59 (0.44, 0.78) | 1  |

2) *Assessment of heterogeneity*

8.1.2.2 *Table 2 Assessment of heterogeneity in European studies*

|     |     | Pair-wise I <sup>2</sup> | Network I <sup>2</sup> |
|-----|-----|--------------------------|------------------------|
| IDU | HC  | 98.8%                    | 98.8%                  |
| MSM | HC  | 92.6%                    | 92.6%                  |
| MSM | IDU | 98.9%                    | 98.9%                  |

3) *SUCRA*

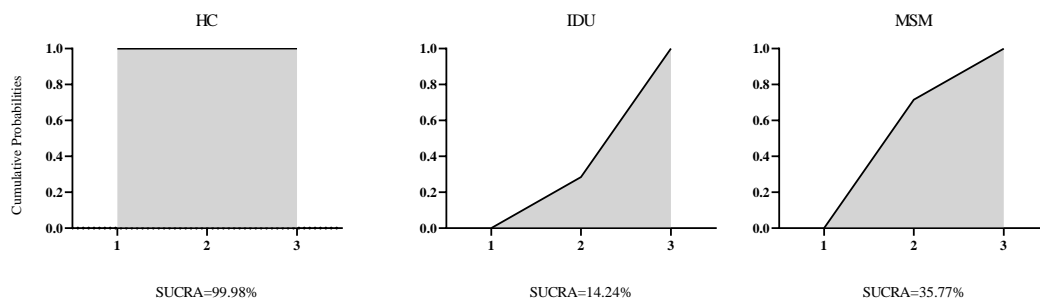

(3) *North America (12 studies included)*

1) *Network results*

8.1.3.1 *Table 1 Network results of AHD risk among MSM, IDU, and HC in North America*

|           | MSM               | IDU               | HC |
|-----------|-------------------|-------------------|----|
| MSM (ref) | 1                 |                   |    |
| IDU (ref) | 0.74 (0.58, 1.00) | 1                 |    |
| HC (ref)  | 0.70 (0.55, 0.90) | 0.92 (0.68, 1.20) | 1  |

2) *Assessment of heterogeneity*

8.1.3.2 *Table 2 Assessment of heterogeneity in North American studies*

|     |     | Pair-wise I <sup>2</sup> | Network I <sup>2</sup> |
|-----|-----|--------------------------|------------------------|
| IDU | HC  | 95.2%                    | 95.6%                  |
| MSM | HC  | 99.5%                    | 99.5%                  |
| MSM | IDU | 98.5%                    | 98.6%                  |

3) *SUCRA*

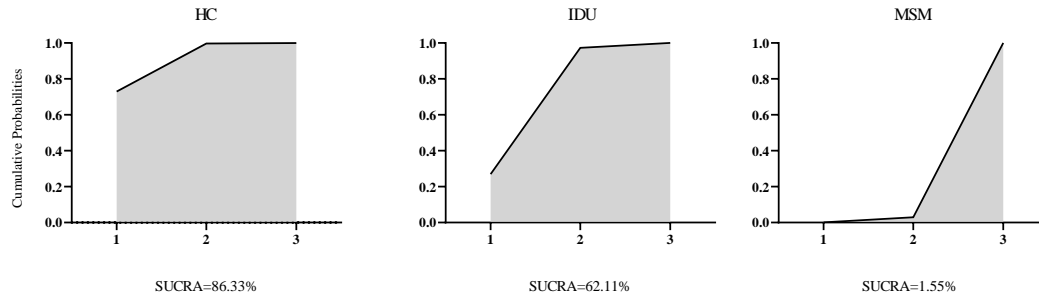

**(4) Oceania (6 studies included)**

**1) Network results**

**8.1.4.1 Table 1 Network results of AHD risk among MSM, IDU, and HC in Oceania**

|           |                   |                   |    |
|-----------|-------------------|-------------------|----|
|           | MSM               | IDU               | HC |
| MSM (ref) | 1                 |                   |    |
| IDU (ref) | 0.93 (0.44, 1.80) | 1                 |    |
| HC (ref)  | 0.36 (0.19, 0.68) | 0.38 (0.20, 0.81) | 1  |

**2) Assessment of heterogeneity**

**8.1.4.2 Table 2 Assessment of heterogeneity in Oceanian studies**

|     |     | Pair-wise I <sup>2</sup> | Network I <sup>2</sup> |
|-----|-----|--------------------------|------------------------|
| IDU | HC  | 53.5%                    | 41.7%                  |
| MSM | HC  | 93.0%                    | 92.8%                  |
| MSM | IDU | 37.7%                    | 30.1%                  |

**3) SUCRA**

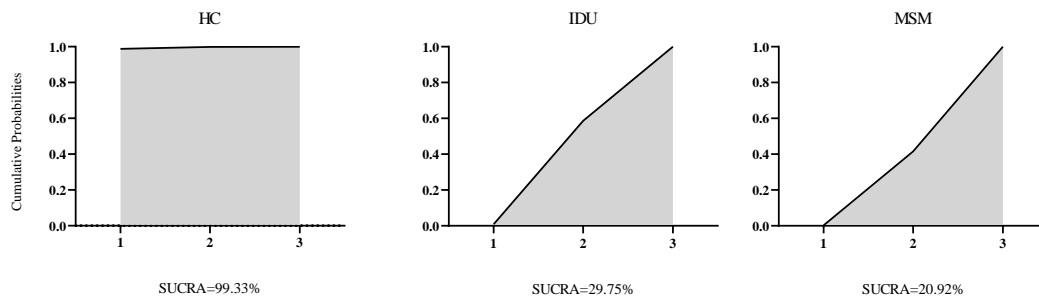



(5) *South America (4 studies included)*

1) *Network results*

8.1.5.1 *Table 1 Network results of AHD risk among MSM, and HC in South America*

|           |                   |     |    |
|-----------|-------------------|-----|----|
|           | MSM               | IDU | HC |
| MSM (ref) | 1                 |     |    |
| IDU (ref) | -                 | 1   |    |
| HC (ref)  | 0.86 (0.45, 1.60) | -   | 1  |

2) *Assessment of heterogeneity*

8.1.5.2 *Table 2 Assessment of heterogeneity in South American studies*

|     |    | Pair-wise I <sup>2</sup> | Network I <sup>2</sup> |
|-----|----|--------------------------|------------------------|
| MSM | HC | 95.0%                    | 95.0%                  |

3) *SUCRA*

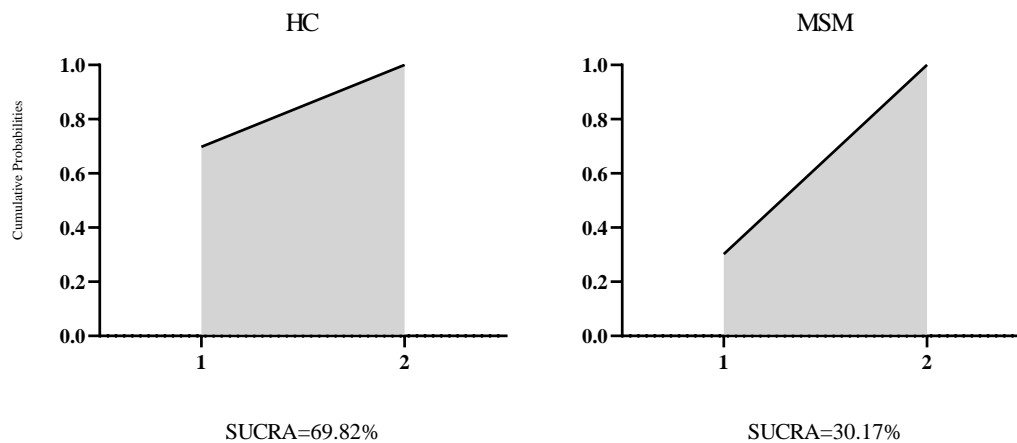

A total of 101 articles were included in the subgroup analysis on continents, with 105 studies.

8.2 PPP<sup>a</sup> 2009 Adjusted by International \$

(1) The Regions whose PPP 2009 was over or equal to the world average level (59 studies included)

1) Network results

8.2.1.1 Table 1 Network results of AHD risk among MSM, IDU, and HC in the regions with PPP 2009 over or equivalent to the world average level

|           |                   |                   |    |
|-----------|-------------------|-------------------|----|
|           | MSM               | IDU               | HC |
| MSM (ref) | 1                 |                   |    |
| IDU (ref) | 0.98 (0.80, 1.20) | 1                 |    |
| HC (ref)  | 0.58 (0.48, 0.73) | 0.59 (0.48, 0.70) | 1  |

2) Assessment of heterogeneity

8.2.1.2 Table 2 Assessment of heterogeneity in the regions with PPP 2009 over or equal to the world average level

|     |     | Pair-wise I <sup>2</sup> | Network I <sup>2</sup> |
|-----|-----|--------------------------|------------------------|
| IDU | HC  | 98.7%                    | 98.7%                  |
| MSM | HC  | 98.7%                    | 98.7%                  |
| MSM | IDU | 98.5%                    | 98.4%                  |

3) SUCRA

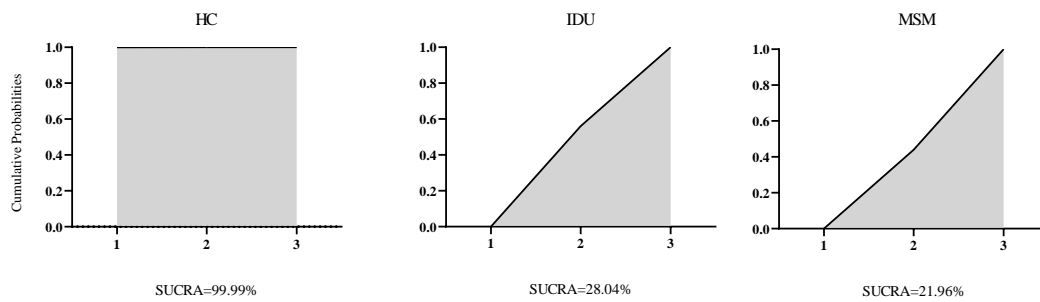

a: Because the median study period of included studies was 2009, the studies were categorized into two groups by PPP 2009 to conduct this subgroup analysis.

(2) *The Regions whose PPP 2009 was below the world average level (43 studies included)*

1) *Network results*

8.2.2.1 *Table 1 Network results of AHD risk among MSM, IDU, and HC in the regions with PPP 2009 under the world average level*

|           | MSM               | IDU               | HC |
|-----------|-------------------|-------------------|----|
| MSM (ref) | 1                 |                   |    |
| IDU (ref) | 0.78 (0.58, 1.00) | 1                 |    |
| HC (ref)  | 0.49 (0.39, 0.61) | 0.63 (0.47, 0.84) | 1  |

2) *Assessment of heterogeneity*

8.2.2.2 *Table 2 Assessment of heterogeneity in the regions with PPP 2009 under the world average level*

|     |     | Pair-wise I <sup>2</sup> | Network I <sup>2</sup> |
|-----|-----|--------------------------|------------------------|
| IDU | HC  | 97.6%                    | 97.7%                  |
| MSM | HC  | 96.4%                    | 96.4%                  |
| MSM | IDU | 90.0%                    | 88.6%                  |

3) *SUCRA*

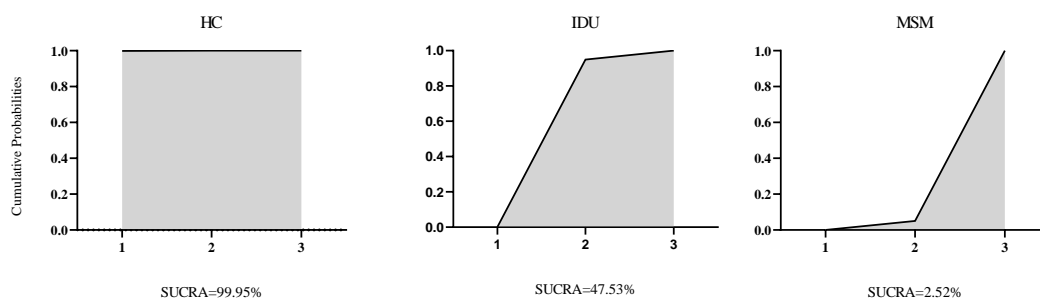

A total of 98 articles were included in the subgroup analysis on the level of economic development, with 102 studies.

### 8.3 Study method

#### (1) Surveillance (65 studies included)

##### 1) Network results

8.3.1.1 Table 1 Network results of AHD risk among MSM, IDU, and HC in surveillance studies

|           | MSM               | IDU               | HC |
|-----------|-------------------|-------------------|----|
| MSM (ref) | 1                 |                   |    |
| IDU (ref) | 1.10 (0.90, 1.50) | 1                 |    |
| HC (ref)  | 0.55 (0.45, 0.67) | 0.48 (0.38, 0.61) | 1  |

##### 2) Assessment of heterogeneity

8.3.1.2 Table 2 Assessment of heterogeneity in surveillance studies

|     |     | Pair-wise I <sup>2</sup> | Network I <sup>2</sup> |
|-----|-----|--------------------------|------------------------|
| IDU | HC  | 98.9%                    | 98.9%                  |
| MSM | HC  | 99.1%                    | 99.1%                  |
| MSM | IDU | 98.4%                    | 98.4%                  |

##### 3) SUCRA

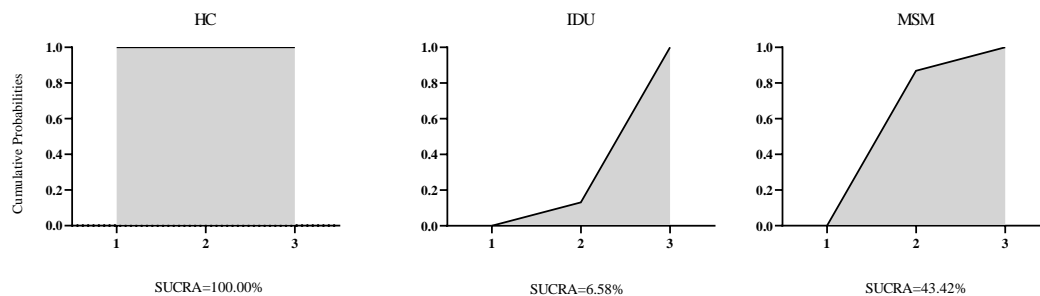

(2) *Cross-section (15 studies included)*

1) *Network results*

8.3.2.1 *Table 1 Network results of AHD risk among MSM, IDU, and HC in cross-section studies*

|           | MSM               | IDU               | HC |
|-----------|-------------------|-------------------|----|
| MSM (ref) | 1                 |                   |    |
| IDU (ref) | 0.89 (0.57, 1.40) | 1                 |    |
| HC (ref)  | 0.49 (0.34, 0.71) | 0.55 (0.36, 0.85) | 1  |

2) *Assessment of heterogeneity*

8.3.2.2 *Table 2 Assessment of heterogeneity in cross-section studies*

|     |     | Pair-wise I <sup>2</sup> | Network I <sup>2</sup> |
|-----|-----|--------------------------|------------------------|
| IDU | HC  | 87.8%                    | 88.0%                  |
| MSM | HC  | 92.7%                    | 92.8%                  |
| MSM | IDU | 90.9%                    | 90.6%                  |

3) *SUCRA*

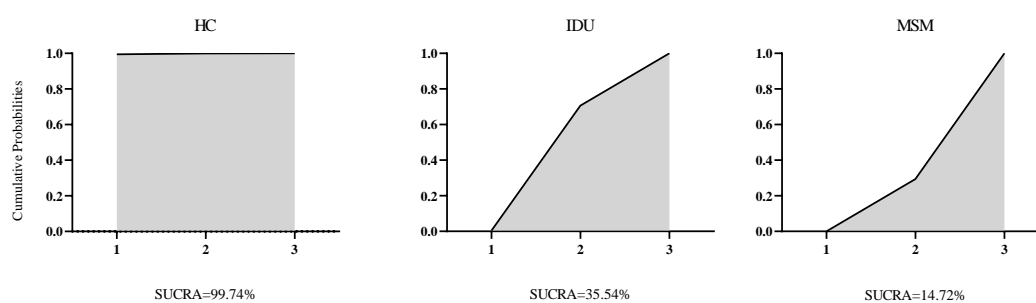

(3) Cohort (25 studies included)

1) Network results

8.3.3.1 Table 1 Network results of AHD risk among MSM, IDU, and HC in cohort studies

|           | MSM               | IDU               | HC |
|-----------|-------------------|-------------------|----|
| MSM (ref) | 1                 |                   |    |
| IDU (ref) | 0.67 (0.47, 0.98) | 1                 |    |
| HC (ref)  | 0.56 (0.40, 0.78) | 0.83 (0.57, 1.20) | 1  |

2) Assessment of heterogeneity

8.3.3.2 Table 2 Assessment of heterogeneity in cohort studies

|     |     | Pair-wise I <sup>2</sup> | Network I <sup>2</sup> |
|-----|-----|--------------------------|------------------------|
| IDU | HC  | 97.2%                    | 97.3%                  |
| MSM | HC  | 93.4%                    | 93.4%                  |
| MSM | IDU | 98.2%                    | 98.2%                  |

3) SUCRA

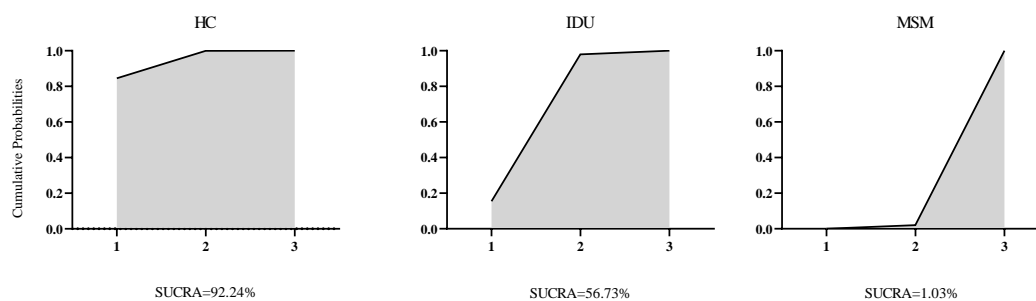

A total of 101 articles were included in the subgroup analysis on study method, with 105 studies.

## 8.4 Time lag

### (1) Shorter time lag ( $0 \leq \text{Time lag} \leq 3 \text{ months}$ ) (43 studies included)

#### 1) Network result

8.4.1.1 Table 1 Network results of AHD risk among MSM, IDU, and HC in studies with a shorter time lag

|           | MSM               | IDU               | HC |
|-----------|-------------------|-------------------|----|
| MSM (ref) | 1                 |                   |    |
| IDU (ref) | 1.10 (0.77, 1.50) | 1                 |    |
| HC (ref)  | 0.57 (0.43, 0.77) | 0.54 (0.39, 0.75) | 1  |

#### 2) Assessment of heterogeneity

8.4.1.2 Table 2 Assessment of heterogeneity in studies with a shorter time lag

|     |     | Pair-wise $I^2$ | Network $I^2$ |
|-----|-----|-----------------|---------------|
| IDU | HC  | 98.5%           | 98.4%         |
| MSM | HC  | 94.5%           | 94.6%         |
| MSM | IDU | 98.7%           | 98.7%         |

#### 3) SUCRA

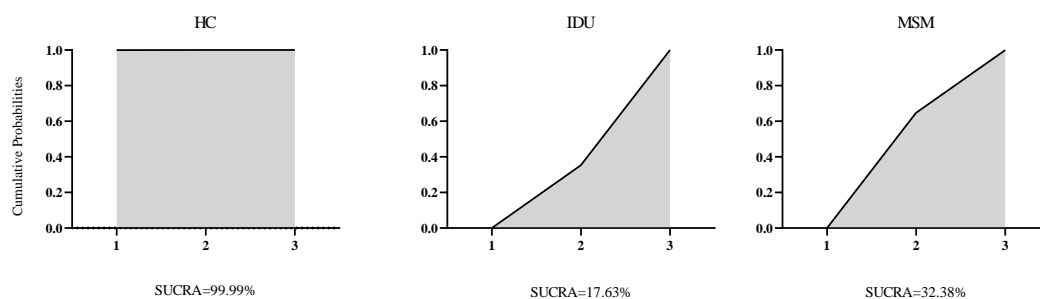

(2) *Longer time lag (3 < Time lag ≤ 12 months) (22 studies included)*

1) *Network result*

8.4.2.1 *Table 1 Network results of AHD risk among MSM, IDU, and HC in studies with a longer time lag*

|           | MSM               | IDU               | HC |
|-----------|-------------------|-------------------|----|
| MSM (ref) | 1                 |                   |    |
| IDU (ref) | 0.95 (0.62, 1.50) | 1                 |    |
| HC (ref)  | 0.59 (0.40, 0.88) | 0.62 (0.41, 0.95) | 1  |

2) *Assessment of heterogeneity*

8.4.2.2 *Table 2 Assessment of heterogeneity in studies with a longer time lag*

|     |     | Pair-wise I <sup>2</sup> | Network I <sup>2</sup> |
|-----|-----|--------------------------|------------------------|
| IDU | HC  | 99.3%                    | 99.3%                  |
| MSM | HC  | 99.5%                    | 99.5%                  |
| MSM | IDU | 99.2%                    | 99.1%                  |

3) *SUCRA*

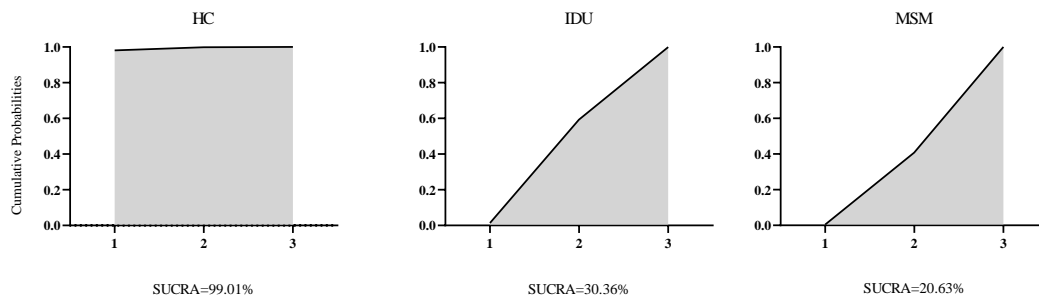

A total of 61 articles were included in the subgroup analysis on time lag, with 65 studies.



## 8.5 Prevalence of AHD

(1) *The study whose prevalence of AHD was over or equal to the mean (higher prevalence) (53 studies included)*

### 1) Network result

8.5.1.1 *Table 1 Network results of AHD risk among MSM, IDU, and HC in the higher prevalence group*

|           | MSM               | IDU               | HC |
|-----------|-------------------|-------------------|----|
| MSM (ref) | 1                 |                   |    |
| IDU (ref) | 0.85 (0.66, 1.10) | 1                 |    |
| HC (ref)  | 0.54 (0.43, 0.67) | 0.63 (0.49, 0.81) | 1  |

### 2) Assessment of heterogeneity

8.5.1.2 *Table 2 Assessment of heterogeneity in the higher prevalence group*

|     |     | Pair-wise I <sup>2</sup> | Network I <sup>2</sup> |
|-----|-----|--------------------------|------------------------|
| IDU | HC  | 98.9%                    | 98.9%                  |
| MSM | HC  | 99.2%                    | 99.2%                  |
| MSM | IDU | 98.3%                    | 98.2%                  |

### 3) SUCRA

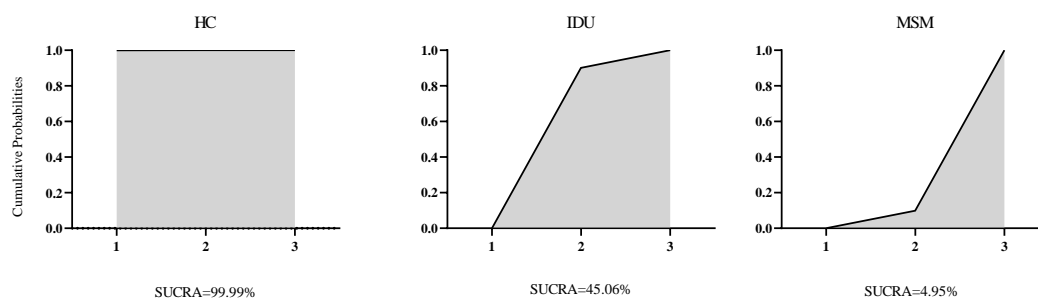

(2) *The study whose prevalence of AHD was under the mean (lower prevalence) (52 studies included)*

1) *Network result*

8.5.2.1 *Table 1 Network results of AHD risk among MSM, IDU, and HC in the lower prevalence group*

|           | MSM               | IDU               | HC |
|-----------|-------------------|-------------------|----|
| MSM (ref) | 1                 |                   |    |
| IDU (ref) | 1.10 (0.83, 1.40) | 1                 |    |
| HC (ref)  | 0.54 (0.43, 0.68) | 0.50 (0.38, 0.65) | 1  |

2) *Assessment of heterogeneity*

8.5.2.2 *Table 2 Assessment of heterogeneity in the lower prevalence group*

|     |     | Pair-wise I <sup>2</sup> | Network I <sup>2</sup> |
|-----|-----|--------------------------|------------------------|
| IDU | HC  | 98.1%                    | 98.1%                  |
| MSM | HC  | 94.7%                    | 94.7%                  |
| MSM | IDU | 98.5%                    | 98.4%                  |

3) *SUCRA*

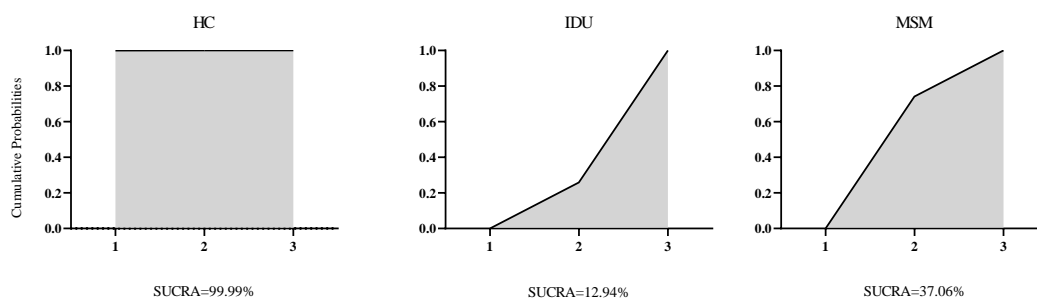

A total of 101 articles were included in the subgroup analysis on the prevalence of AHD, with 105 studies.

**Appendix A9 (Assessment of AHD risk among PLHIV via HC under different sex work policies)**

**9.1 Table 1: Characteristic of the studies for ecological regression to assess the AHD risk among PLHIV via HC under different sex work policies**

| Region                                       | Sex work policy | No. of AHD via HC | No. of PLHIV via HC | PPP 2005       | PPP 2009       |
|----------------------------------------------|-----------------|-------------------|---------------------|----------------|----------------|
| Argentina <sup>32</sup>                      | Legal           | 93                | 507                 | 13916·53051    | 16753·39489    |
| Australia <sup>20,53</sup>                   | Limitedly Legal | 152               | 539                 | 32575·06925    | 40300·30823    |
| Australia (Victoria) <sup>8</sup>            | Legal           | 173               | 491                 | 32575·06925    | 40300·30823    |
| Brazil <sup>50</sup>                         | Legal           | 127               | 277                 | 11004·95894    | 13288·43881    |
| Canada <sup>53</sup>                         | Legal           | 20                | 231                 | 36211·08460    | 38797·38505    |
| China (Mainland) <sup>9,52,62,69,78,97</sup> | Illegal         | 20716             | 44606               | 5081·04904     | 8352·68993     |
| China (Hong Kong) <sup>1</sup>               | Legal           | 255               | 876                 | 36461·35168    | 43949·57139    |
| Denmark <sup>35</sup>                        | Legal           | 43                | 107                 | 34150·15580    | 40339·68872    |
| Finland <sup>3</sup>                         | Legal           | 76                | 289                 | 31993·40726    | 37830·02314    |
| France <sup>53,63,68,71,77</sup>             | Legal           | 4486              | 14062               | 30498·57929    | 34685·17380    |
| Georgia <sup>64</sup>                        | Illegal         | 414               | 1003                | 4673·31805     | 6316·00442     |
| Germany <sup>5</sup>                         | Legal           | 35                | 69                  | 31968·46745    | 37042·44788    |
| Guatemala <sup>83</sup>                      | Legal           | 832               | 3174                | 5585·65058     | 6458·25303     |
| Italy <sup>4,11,33,49,53,74</sup>            | Legal           | 3261              | 6772                | 30051·77327    | 34513·97292    |
| Israel <sup>55</sup>                         | Legal           | 28                | 87                  | 24810·95568    | 27499·12129    |
| Malaysia <sup>76</sup>                       | Illegal         | 1616              | 3345                | 16531·59892    | 19283·45231    |
| Netherlands <sup>14</sup>                    | Legal           | 2725              | 6576                | 37625·56171    | 44566·06190    |
| New Zealand <sup>40</sup>                    | Legal           | 85                | 202                 | 25677·41908    | 30699·66202    |
| Peru <sup>19</sup>                           | Legal           | 492               | 777                 | 6705·08808     | 9078·556657    |
| Poland <sup>72</sup>                         | Legal           | 381               | 840                 | 13895·92354    | 19246·44868    |
| Puerto Rico <sup>27</sup>                    | Legal           | 228               | 458                 | 31518·48470    | 32816·94611    |
| Singapore <sup>13</sup>                      | Legal           | 1426              | 2641                | 55809·70032    | 62873·49475    |
| South Korea <sup>24</sup>                    | Illegal         | 412               | 1189                | 24196·42385    | 28325·20930    |
| Spain <sup>6,7,15,34,37,38,48,79</sup>       | Legal           | 6514              | 14974               | 27702·46431    | 32391·02051    |
| Sweden <sup>84</sup>                         | Legal           | 88                | 121                 | 34006·10428    | 39694·97557    |
| UK <sup>18</sup>                             | Legal           | 14                | 34                  | 32492·25961    | 34769·39632    |
| USA <sup>53,81</sup>                         | Limitedly Legal | 26470             | 73285               | 44114·74778    | 47099·98047    |
| USA (California) <sup>23,73</sup>            | Illegal         | 4981              | 6633                | 44114·74778    | 47099·98047    |
| USA (Texas) <sup>25</sup>                    | Illegal         | 854               | 2648                | 44114·74778    | 47099·98047    |
| USA (Florida) <sup>47</sup>                  | Illegal         | 2777              | 8906                | 44114·74778    | 47099·98047    |
| USA (South Carolina) <sup>21,22,29</sup>     | Illegal         | 711               | 1366                | 44114·74778    | 47099·98047    |
| USA (Washington) <sup>26</sup>               | Illegal         | 125               | 284                 | 44114·74778    | 47099·98047    |
| 9 European countries <sup>a66</sup>          | Legal           | 321               | 985                 | Over world PPP | Over world PPP |
| World                                        | -               | -                 | -                   | 10130·40305    | 12229·53682    |

a: Belgium, Germany, Greece, Italy, Netherlands, Portugal, Spain, Switzerland, and the United Kingdom

Legal and Illegal were coded as TRUE and FALSE respectively.

Two studies were excluded in this model due to inconsistent sex work legislation in different territories/states in Australia<sup>20,53</sup>/USA<sup>53</sup>.

Source of PPP:

<https://data.worldbank.org/indicator/NY.GDP.PCAP.PP.CD>

Source of sex work policies:

In accordance with the ProCon.org, sex work policies in different regions were classified:

<https://prostitution.procon.org/view.resource.php?resourceID=000772>

Particularly, the sex work policies in Australia (Capital Territory), Australia (Victoria), China (Hong Kong), Sweden, USA (California), USA (Texas), USA (Florida), USA (South Carolina), and USA (Washington) were based on following sources:

Australia (Capital territory): [https://en.wikipedia.org/wiki/Prostitution\\_in\\_Australia#Australian\\_Capital\\_Territory](https://en.wikipedia.org/wiki/Prostitution_in_Australia#Australian_Capital_Territory)

Australia (Victoria): <http://www.scarletalliance.org.au/laws/vic/>

China (Hong Kong): <http://www.hklii.hk/chi/hk/legis/ord/200/>

Sweden: Charlotta H, May-Len S. The Swedish Sex Purchase Act: Where Does it Stand? Oslo Law Review 2017; **2**(4): 82-104

USA (California): <https://statelaws.findlaw.com/california-law/california-prostitution-laws.html>

USA (Texas): <https://statelaws.findlaw.com/texas-law/texas-prostitution-laws.html>

USA (Florida): <https://statelaws.findlaw.com/florida-law.html>

USA (South Carolina): <https://statelaws.findlaw.com/south-carolina-law/south-carolina-prohibited-consensual-sexual-activity-laws.html>

USA (Washington): <https://statelaws.findlaw.com/washington-law/washington-prostitution-laws0.html>

**9.2 Table 2: Sensitivity analysis regarding the relation between sex work policies and the AHD among PLHIV through HC**

| Variable               | Unadjusted model 1 <sup>a</sup> | Adjusted model 2 <sup>b</sup> | Unadjusted model 2 <sup>c</sup> | Adjusted model 2 <sup>d</sup> |
|------------------------|---------------------------------|-------------------------------|---------------------------------|-------------------------------|
|                        | OR (95%CI)                      | OR (95%CI)                    | OR (95%CI)                      | OR (95%CI)                    |
| <b>PPP</b>             |                                 |                               |                                 |                               |
| ≤ World PPP            | Ref.                            | Ref.                          | Ref.                            | Ref.                          |
| > World PPP            | 0.91 (0.89, 0.93)               | 0.85 (0.83, 0.88)             | 0.91 (0.89, 0.93)               | 0.84 (0.82, 0.87)             |
| <b>Sex work Policy</b> |                                 |                               |                                 |                               |
| Legal                  | Ref.                            | Ref.                          | Ref.                            | Ref.                          |
| Illegal                | 1.30 (1.27, 1.33)               | 1.22 (1.18, 1.25)             | 1.30 (1.27, 1.32)               | 1.21 (1.18, 1.25)             |
| <b>Time Lag</b>        |                                 |                               |                                 |                               |
| ≤ 3 months             | Ref.                            | Ref.                          | Ref.                            | Ref.                          |
| > 3 months             | 1.90 (1.85, 1.96)               | 2.04 (1.98, 2.11)             | 1.90 (1.85, 1.96)               | 2.07 (2.01, 2.13)             |

a: Model 1 is based on all the studies for the network meta-analysis. The study median period for included studies in this review (not only for those in the ecological model) is 2009, and hence, model 1 incorporates PPP 2009 to evaluate the robustness of estimation.

b: The adjusted model 1 takes PPP 2009 of the regions, the time lag and sex work policies into consideration.

c: Model 2 is based on the studies whose number of PLHIV via HC over or equal to lower quartile. The study median period for included studies in the ecological model is 2005, and hence in model 2, PPP 2005 was adopted.

d: The adjusted model 2 takes PPP 2005 of the regions, the time lag, and sex work policies into consideration.

The regression model is weighted by sample sizes.

The studies which do not report explicit time lag were excluded.

**Appendix A10 (Assessment of AHD risk among PLHIV via IDU under different types of law towards CCC)**

**10.1 Table 1: Characteristic of the studies for ecological regression to assess the AHD risk among PLHIV via IDU under different types of law towards CCC**

| Region                                    | Type of law    | No. of AHD via IDU | No. of PLHIV via IDU | PPP 2004    | PPP 2009    |
|-------------------------------------------|----------------|--------------------|----------------------|-------------|-------------|
| Australia <sup>2,8,20,53</sup>            | C              | 44                 | 265                  | 31327-37749 | 40300-30823 |
| Canada <sup>53</sup>                      | No federal law | 8                  | 92                   | 33796-99920 | 38797-38505 |
| China (Mainland) <sup>9,52,69,78,97</sup> | C              | 427                | 1298                 | 4449-56192  | 8352-689933 |
| China (Hong Kong) <sup>1</sup>            | C              | 7                  | 23                   | 33071-35549 | 43949-57139 |
| Finland <sup>3</sup>                      | M+S            | 31                 | 237                  | 31118-14662 | 37830-02314 |
| France <sup>53,71,77</sup>                | C              | 952                | 2468                 | 29034-00071 | 34685-17380 |
| Georgia <sup>64</sup>                     | M              | 392                | 649                  | 4109-37201  | 6316-00442  |
| Germany <sup>5</sup>                      | C              | 11                 | 23                   | 31417-36334 | 37042-44788 |
| Israel <sup>55</sup>                      | C              | 5                  | 52                   | 25199-13405 | 27499-12129 |
| Italy <sup>4,11,33,49,53,74</sup>         | S              | 1217               | 9657                 | 29447-35351 | 34513-97292 |
| Malaysia <sup>76</sup>                    | C              | 592                | 1056                 | 15522-70405 | 19283-45231 |
| Netherlands <sup>14</sup>                 | C              | 336                | 701                  | 35777-15324 | 44566-06190 |
| Poland <sup>72</sup>                      | C              | 322                | 667                  | 13341-10000 | 19246-44868 |
| Puerto Rico <sup>27</sup>                 | Unfound        | 61                 | 139                  | 31141-05605 | 32816-94611 |
| Spain <sup>6,7,15,34,37,38,48,79</sup>    | C              | 4638               | 23268                | 26180-06058 | 32391-02051 |
| Sweden <sup>84</sup>                      | C              | 150                | 191                  | 33567-30607 | 39694-97557 |
| UK <sup>18</sup>                          | C              | 9                  | 23                   | 31788-46875 | 34769-39632 |
| USA <sup>53</sup>                         | No federal law | 1357               | 3470                 | 41712-80107 | 47099-98047 |
| USA (California) <sup>23</sup>            | C              | 1916               | 3324                 | 41712-80107 | 47099-98047 |
| USA (Texas) <sup>25</sup>                 | C              | 240                | 792                  | 41712-80107 | 47099-98047 |
| USA (South Carolina) <sup>21,22,29</sup>  | C              | 293                | 496                  | 41712-80107 | 47099-98047 |
| USA (Washington) <sup>26</sup>            | C              | 75                 | 179                  | 41712-80107 | 47099-98047 |
| World                                     | -              | -                  | -                    | 9516-57792  | 12229-53682 |

C and M/S/M+S were coded as TRUE and FALSE respectively.

Three studies were excluded in this model due inconsistent legislation to CCC in different regions in Canada<sup>53</sup>, Puerto Rico<sup>27</sup>, and the USA<sup>53</sup>.

Source of PPP

<https://data.worldbank.org/indicator/NY.GDP.PCAP.PP.CD>

Sources of CCC with criminal or non-criminal justices were mainly based on this article:

Israelsson M, Gerdner A. Compulsory commitment to the care of substance misusers: international trends during 25 Years. *European addiction research* 2012; **18**(6): 302-21.

Particularly, sources of CCC in Malaysia, Sweden and USA were based on these websites.

Malaysia: WHO Regional Office for the Western Pacific. Assessment of compulsory treatment of people who use drugs in Cambodia, China, Malaysia and Viet Nam: Application of selected human rights principles. Geneva: World Health Organization; 2009.

Sweden:

[https://www.government.se/496f5b/contentassets/89b85401ed204484832fb1808cad6012/rk\\_21164\\_broschyr\\_narkotika\\_a4\\_en\\_3\\_tillg.pdf](https://www.government.se/496f5b/contentassets/89b85401ed204484832fb1808cad6012/rk_21164_broschyr_narkotika_a4_en_3_tillg.pdf)

USA: <https://www.therecoveryvillage.com/recovery-blog/which-states-have-involuntary-commitment-laws-for-addiction-treatment/#gref>

Sources of Criminal law on Controlled drug possession in the USA were based on the following websites.

USA (California): <https://statelaws.findlaw.com/california-law/california-drug-possession-laws.html>

USA (Texas): <https://statelaws.findlaw.com/texas-law/texas-drug-possession-laws.html>

USA (South Carolina): <https://statelaws.findlaw.com/south-carolina-law/south-carolina-heroin-laws.html>

USA (Washington): <https://statelaws.findlaw.com/washington-law/washington-drug-possession-laws-.html>

**10.2 Table 2: Sensitivity analysis regarding the relationship between criminal justice legislation towards CCC and AHD among PLHIV through IDU using different ecological regression models.**

| Variable         | Unadjusted model 1 <sup>a</sup> | Adjusted model 1 <sup>b</sup> | Unadjusted model 2 <sup>c</sup> | Adjusted model 2 <sup>d</sup> |
|------------------|---------------------------------|-------------------------------|---------------------------------|-------------------------------|
|                  | OR (95%CI)                      | OR (95%CI)                    | OR (95%CI)                      | OR (95%CI)                    |
| <b>PPP</b>       |                                 |                               |                                 |                               |
| ≤ World PPP      | Ref.                            | Ref.                          | Ref.                            | Ref.                          |
| > World PPP      | 0.51 (0.46, 0.55)               | 0.48 (0.41, 0.48)             | 0.51 (0.47, 0.56)               | 0.45 (0.42, 0.49)             |
| <b>CCC</b>       |                                 |                               |                                 |                               |
| Non-Criminal CCC | Ref.                            | Ref.                          | Ref.                            | Ref.                          |
| Criminal CCC     | 1.95 (1.85, 2.05)               | 4.38 (4.10, 4.67)             | 1.95 (1.85, 2.06)               | 4.44 (4.12, 4.74)             |
| <b>Time Lag</b>  |                                 |                               |                                 |                               |
| ≤ 3 months       | Ref.                            | Ref.                          | Ref.                            | Ref.                          |
| > 3 months       | 1.44 (1.39, 1.50)               | 2.72 (2.57, 2.87)             | 1.48 (1.39, 1.51)               | 2.75 (2.61, 2.91)             |

a: Model 1 is based on all the studies for the network meta-analysis. The study median period for included studies in this review (not only for those in the ecological model) is 2009, and hence, model 1 incorporates PPP 2009 to evaluate the robustness of estimation.

b: The adjusted model 1 takes PPP 2009 of the regions, the time lag, and legislation to CCC into consideration.

c: Model 2 is based on the studies whose number of PLHIV via IDU over or equal to lower quartile. The study median period for included studies in the ecological model is 2004, and hence in model 2, PPP 2004 was adopted.

d: The adjusted model 2 takes PPP 2004 of the regions, the time lag, and legislation to CCC into consideration.

The regression model is weighted by sample sizes.

The studies which do not report explicit time lag were excluded.

*Appendix A11 (PPP tendency regarding included studies in the review)*

*11.1 Figure 1: PPP tendency during the period from 1990 to 2018*

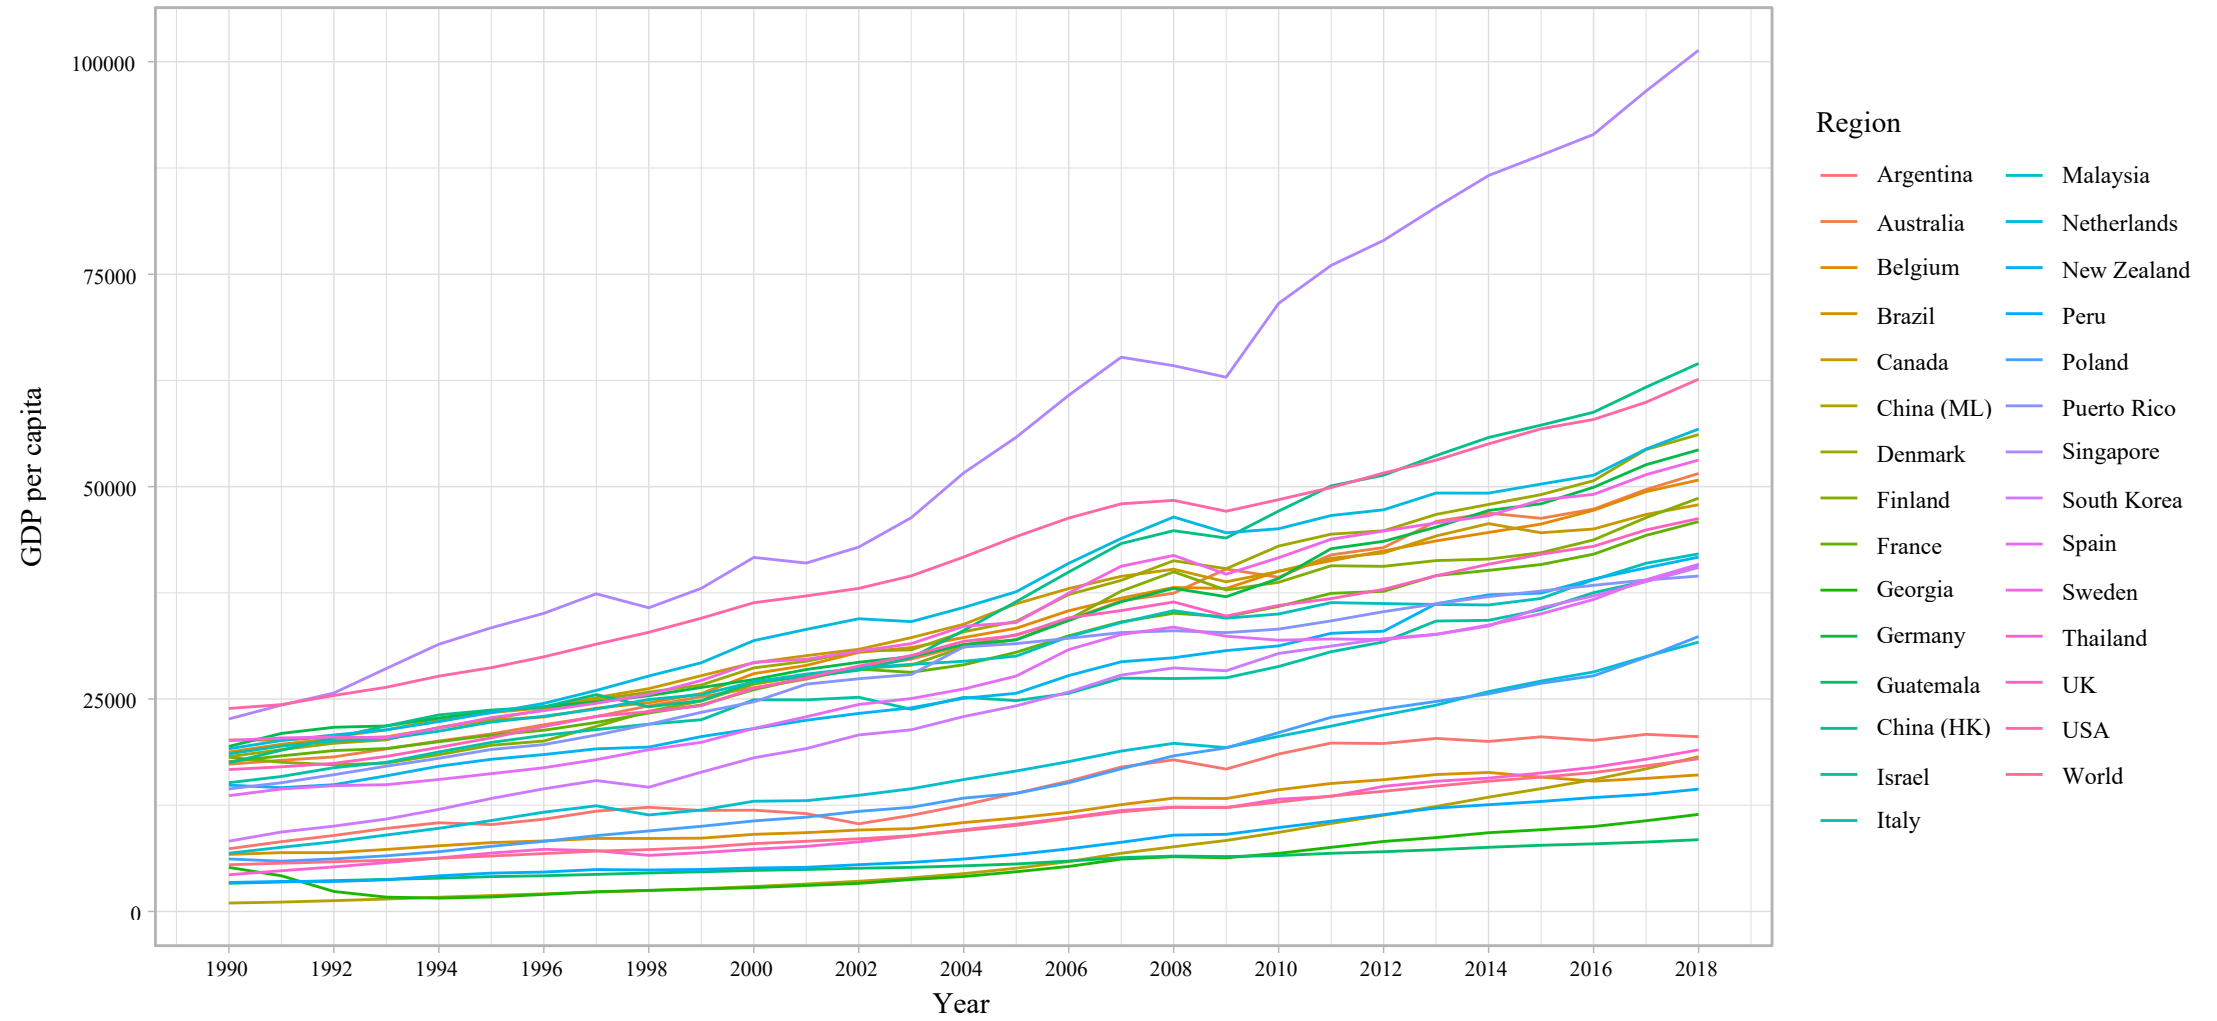

**11.2 Table 1: Detailed PPP in 15 of 28 regions incorporated in ecological analysis during the period from 1990 to 2018**

| Year | Argentina | Australia | Belgium   | Brazil    | Canada    | China (ML) | Germany   | Denmark   | Finland   | France    | UK        | Georgia   | Guatemala | China (HK) | Israel    |
|------|-----------|-----------|-----------|-----------|-----------|------------|-----------|-----------|-----------|-----------|-----------|-----------|-----------|------------|-----------|
| 1990 | 7380-115  | 17329-578 | 18758-998 | 6710-966  | 20173-936 | 987-641    | 19423-020 | 18215-506 | 18149-458 | 17624-238 | 16698-342 | 5181-281  | 3310-022  | 17504-338  | 15149-217 |
| 1991 | 8210-643  | 17790-766 | 19675-633 | 6919-983  | 20160-729 | 1100-814   | 20952-373 | 19044-468 | 17557-338 | 18309-472 | 17022-742 | 4196-651  | 3465-056  | 18970-183  | 15886-333 |
| 1992 | 8942-570  | 18189-077 | 20349-327 | 6925-382  | 20557-463 | 1270-297   | 21676-676 | 19794-108 | 17263-162 | 18931-870 | 17428-601 | 2346-805  | 3629-281  | 20439-901  | 16914-438 |
| 1993 | 9777-214  | 19131-540 | 20550-640 | 7297-686  | 21367-203 | 1463-802   | 21834-092 | 20197-841 | 17457-700 | 19175-313 | 18248-570 | 1685-498  | 3771-760  | 21843-256  | 17555-120 |
| 1994 | 10435-911 | 20064-287 | 21600-125 | 7723-902  | 22555-697 | 1671-201   | 22769-204 | 21655-924 | 18453-167 | 19972-179 | 19312-177 | 1566-383  | 3915-657  | 23129-518  | 18769-467 |
| 1995 | 10225-119 | 20894-397 | 22531-717 | 8102-671  | 23401-875 | 1872-607   | 23581-176 | 22661-059 | 19557-936 | 20745-458 | 20434-785 | 1703-638  | 4100-385  | 23701-063  | 19890-470 |
| 1996 | 10857-430 | 21972-053 | 22891-103 | 8300-247  | 23962-499 | 2074-362   | 24109-590 | 23711-021 | 20057-653 | 21331-450 | 21760-009 | 2000-438  | 4202-790  | 24070-361  | 20728-735 |
| 1997 | 11802-843 | 22934-786 | 23927-506 | 8594-563  | 25167-520 | 2281-444   | 24644-531 | 24925-790 | 21778-647 | 22241-413 | 22959-332 | 2322-295  | 4363-092  | 25520-756  | 21402-493 |
| 1998 | 12255-676 | 24196-721 | 24563-975 | 8588-360  | 26220-266 | 2464-186   | 25392-582 | 25813-649 | 23558-561 | 23359-058 | 23515-161 | 2482-006  | 4530-221  | 24087-881  | 22038-863 |
| 1999 | 11878-731 | 25264-364 | 25642-262 | 8624-439  | 27745-807 | 2668-230   | 26360-147 | 26653-829 | 24768-647 | 24307-499 | 24209-651 | 2643-925  | 4666-098  | 24810-071  | 22565-641 |
| 2000 | 11916-583 | 26328-674 | 27988-474 | 9073-979  | 29265-084 | 2936-288   | 27298-109 | 28662-105 | 26752-872 | 26094-253 | 26255-127 | 2806-774  | 4830-764  | 27068-822  | 24912-328 |
| 2001 | 11514-619 | 27336-683 | 28958-493 | 9274-250  | 30107-657 | 3227-419   | 28475-876 | 29449-615 | 27770-597 | 27501-542 | 27512-344 | 3053-171  | 4935-713  | 27613-445  | 24901-805 |
| 2002 | 10310-129 | 28718-241 | 30482-785 | 9581-995  | 30853-201 | 3553-924   | 29326-912 | 30640-345 | 28567-171 | 28523-886 | 28881-941 | 3300-718  | 5086-551  | 28388-907  | 25207-923 |
| 2003 | 11307-758 | 29693-906 | 31056-430 | 9747-943  | 32225-052 | 3958-472   | 29989-985 | 30786-244 | 28984-889 | 28141-461 | 30126-162 | 3759-114  | 5188-204  | 29858-759  | 23792-062 |
| 2004 | 12527-800 | 31327-377 | 32237-965 | 10460-553 | 33796-999 | 4449-562   | 31417-363 | 32908-685 | 31118-147 | 29034-001 | 31788-469 | 4109-372  | 5368-507  | 33071-355  | 25199-134 |
| 2005 | 13916-531 | 32575-069 | 33332-331 | 11004-959 | 36211-085 | 5081-049   | 31968-467 | 34150-156 | 31993-407 | 30498-579 | 32492-26  | 4673-318  | 5585-651  | 36461-352  | 24810-956 |
| 2006 | 15334-937 | 34306-652 | 35386-244 | 11659-396 | 37999-039 | 5867-797   | 34241-768 | 37295-655 | 34363-043 | 32434-860 | 34554-357 | 5298-315  | 5928-026  | 39949-113  | 25670-087 |
| 2007 | 16994-696 | 36560-406 | 36872-635 | 12568-201 | 39439-807 | 6847-070   | 36450-821 | 38968-509 | 37703-174 | 34088-360 | 35407-539 | 6157-052  | 6327-755  | 43300-433  | 27454-700 |
| 2008 | 17850-130 | 37459-308 | 38133-501 | 13332-147 | 40275-990 | 7615-030   | 38028-772 | 41278-329 | 39969-388 | 35095-263 | 36426-503 | 6448-184  | 6516-891  | 44813-102  | 27414-748 |
| 2009 | 16753-395 | 40300-308 | 38008-832 | 13288-439 | 38797-385 | 8352-690   | 37042-448 | 40339-689 | 37830-023 | 34685-174 | 34769-396 | 6316-004  | 6458-253  | 43949-571  | 27499-121 |
| 2010 | 18524-857 | 39324-369 | 40051-956 | 14320-372 | 40012-391 | 9303-734   | 39187-403 | 42999-626 | 38737-414 | 35900-046 | 36012-677 | 6838-624  | 6576-669  | 47123-352  | 28829-531 |
| 2011 | 19817-450 | 41965-358 | 41284-151 | 15061-957 | 41569-450 | 10355-496  | 42692-520 | 44403-394 | 40683-528 | 37440-639 | 36820-322 | 7545-939  | 6844-541  | 50085-959  | 30568-959 |
| 2012 | 19764-225 | 42826-790 | 42435-909 | 15506-562 | 42189-196 | 11328-282  | 43564-148 | 44803-962 | 40620-176 | 37679-122 | 37911-258 | 8239-544  | 7031-531  | 51344-503  | 31725-325 |
| 2013 | 20365-613 | 45902-048 | 43611-073 | 16111-444 | 44188-732 | 12361-398  | 45232-198 | 46726-853 | 41293-516 | 39523-854 | 39505-353 | 8694-221  | 7264-854  | 53649-863  | 34178-483 |
| 2014 | 20008-321 | 46880-221 | 44604-511 | 16358-391 | 45645-564 | 13446-402  | 47190-769 | 47901-448 | 41470-202 | 40141-585 | 40867-476 | 9263-947  | 7552-718  | 55781-745  | 34262-616 |
| 2015 | 20551-833 | 46270-197 | 45592-356 | 15813-873 | 44567-866 | 14454-998  | 47979-484 | 49058-496 | 42220-958 | 40833-242 | 42042-919 | 9617-557  | 7788-498  | 57235-183  | 35514-545 |
| 2016 | 20130-408 | 47352-112 | 47214-181 | 15331-551 | 45011-643 | 15513-273  | 49921-331 | 50694-189 | 43729-964 | 42047-287 | 42977-221 | 9993-515  | 7955-320  | 58755-308  | 37513-392 |
| 2017 | 20843-155 | 49653-716 | 49411-869 | 15662-247 | 46723-318 | 16782-208  | 52574-260 | 54356-448 | 46343-577 | 44255-942 | 44896-265 | 10674-176 | 8166-858  | 61706-815  | 38867-762 |
| 2018 | 20567-302 | 51544-867 | 50774-906 | 16068-020 | 47870-726 | 18210-094  | 54327-126 | 56120-128 | 48635-850 | 45877-075 | 46239-713 | 11420-630 | 8447-447  | 64487-596  | 40786-280 |

Source of PPP: [https://data.worldbank.org/indicator/NY.GDP.PCAP.PP.CD?end=2018&name\\_desc=false&start=2009](https://data.worldbank.org/indicator/NY.GDP.PCAP.PP.CD?end=2018&name_desc=false&start=2009)



**11.3 Table 2: Detailed PPP in 13 of 28 regions incorporated in ecological analysis during the period from 1990 to 2018**

| Year | Italy     | South Korea | Spain     | Malaysia  | Netherlands | New Zealand | Peru      | Poland    | Puerto Rico | Singapore  | Sweden    | Thailand  | USA       | World     |
|------|-----------|-------------|-----------|-----------|-------------|-------------|-----------|-----------|-------------|------------|-----------|-----------|-----------|-----------|
| 1990 | 18547.405 | 8273.406    | 13627.326 | 6850.467  | 19145.3862  | 14863.604   | 3409.303  | 6175.624  | 14423.787   | 22655.1187 | 20120.529 | 4317.520  | 23888.600 | 5494.054  |
| 1991 | 19456.168 | 9345.823    | 14410.138 | 7552.844  | 20116.464   | 14566.031   | 3530.681  | 5915.541  | 15147.648   | 24286.781  | 20422.895 | 4788.441  | 24342.259 | 5676.672  |
| 1992 | 20051.934 | 10044.191   | 14802.792 | 8197.668  | 20768.309   | 14917.763   | 3522.121  | 6183.525  | 16095.725   | 25705.585  | 20525.561 | 5240.479  | 25418.991 | 5843.826  |
| 1993 | 20339.528 | 10875.124   | 14919.635 | 8994.020  | 21378.214   | 15960.705   | 3723.090  | 6549.984  | 17097.759   | 28598.323  | 20458.667 | 5754.843  | 26387.294 | 6034.345  |
| 1994 | 21216.387 | 12008.474   | 15527.29  | 9784.927  | 22346.117   | 17092.406   | 4191.260  | 7029.081  | 18025.633   | 31448.465  | 21595.665 | 6289.816  | 27694.853 | 6269.067  |
| 1995 | 22286.227 | 13299.161   | 16218.281 | 10698.850 | 23409.695   | 17907.653   | 4511.594  | 7664.955  | 19063.859   | 33390.077  | 22814.831 | 6874.042  | 28690.876 | 6525.277  |
| 1996 | 22968.134 | 14433.001   | 16916.101 | 11682.302 | 24484.181   | 18464.033   | 4636.048  | 8254.596  | 19640.503   | 35086.415  | 23634.028 | 7314.036  | 29967.713 | 6812.005  |
| 1997 | 23818.968 | 15406.220   | 17868.826 | 12431.504 | 26014.333   | 19137.323   | 4930.388  | 8922.219  | 20760.356   | 37384.437  | 24496.822 | 7150.100  | 31459.139 | 7101.487  |
| 1998 | 24946.914 | 14621.300   | 19029.289 | 11355.614 | 27708.513   | 19343.059   | 4879.817  | 9471.456  | 22028.159   | 35740.227  | 25544.733 | 6598.524  | 32853.677 | 7274.110  |
| 1999 | 25531.625 | 16392.809   | 19907.161 | 11931.658 | 29268.536   | 20579.366   | 4943.312  | 10022.395 | 23432.969   | 38026.449  | 27181.362 | 6919.689  | 34513.562 | 7532.387  |
| 2000 | 27027.191 | 18082.955   | 21533.909 | 12973.900 | 31875.236   | 21521.707   | 5115.128  | 10652.937 | 24672.338   | 41662.744  | 29320.702 | 7312.811  | 36334.909 | 7983.224  |
| 2001 | 27932.620 | 19168.215   | 22910.780 | 13037.700 | 33194.046   | 22500.478   | 5193.025  | 11101.960 | 26748.013   | 41000.418  | 29679.246 | 7659.243  | 37133.243 | 8256.708  |
| 2002 | 28641.558 | 20775.105   | 24363.015 | 13670.038 | 34447.205   | 23306.280   | 5500.924  | 11781.071 | 27384.784   | 42886.181  | 30636.360 | 8190.496  | 38023.161 | 8549.789  |
| 2003 | 29081.294 | 21376.766   | 25055.975 | 14437.407 | 34111.803   | 23967.421   | 5778.612  | 12257.145 | 27890.783   | 46342.296  | 31512.931 | 8875.774  | 39496.486 | 8914.929  |
| 2004 | 29447.354 | 22936.812   | 26180.061 | 15522.704 | 35777.153   | 25080.472   | 6171.598  | 13341.100 | 31141.056   | 51612.824  | 33567.306 | 9621.586  | 41712.801 | 9516.578  |
| 2005 | 30051.773 | 24196.424   | 27702.464 | 16531.599 | 37625.562   | 25677.419   | 6705.088  | 13895.924 | 31518.485   | 55809.700  | 34006.104 | 10270.273 | 44114.748 | 10130.403 |
| 2006 | 32331.961 | 25820.972   | 30815.268 | 17632.131 | 40971.261   | 27758.166   | 7365.737  | 15142.185 | 32150.488   | 60745.456  | 37463.617 | 11039.842 | 46298.731 | 10955.456 |
| 2007 | 33996.491 | 27822.277   | 32597.056 | 18872.822 | 43896.739   | 29385.896   | 8140.980  | 16787.970 | 32821.900   | 65230.108  | 40628.148 | 11885.809 | 47975.968 | 11718.652 |
| 2008 | 35402.917 | 28655.984   | 33463.654 | 19787.699 | 46420.202   | 29860.528   | 8984.079  | 18310.443 | 33036.526   | 64230.636  | 41904.129 | 12261.460 | 48382.558 | 12257.153 |
| 2009 | 34513.973 | 28325.209   | 32391.021 | 19283.452 | 44566.062   | 30699.662   | 9078.557  | 19246.449 | 32816.946   | 62873.495  | 39694.976 | 12207.968 | 47099.98  | 12229.537 |
| 2010 | 35008.068 | 30365.278   | 31923.123 | 20605.201 | 45040.318   | 31253.054   | 9869.070  | 21048.331 | 33229.923   | 71566.000  | 41632.686 | 13213.315 | 48466.823 | 12871.543 |
| 2011 | 36347.342 | 31228.511   | 32068.271 | 21806.823 | 46599.021   | 32734.537   | 10626.077 | 22850.639 | 34195.651   | 76034.334  | 43808.501 | 13537.488 | 49883.114 | 13584.861 |
| 2012 | 36237.110 | 32097.164   | 31988.254 | 23105.075 | 47272.103   | 32986.183   | 11400.336 | 23833.210 | 35286.059   | 78978.823  | 44774.387 | 14727.143 | 51603.497 | 14144.581 |
| 2013 | 36131.132 | 32615.773   | 32603.906 | 24279.372 | 49241.518   | 36219.424   | 12169.120 | 24719.248 | 36207.680   | 82881.407  | 45721.995 | 15318.637 | 53106.910 | 14755.240 |
| 2014 | 36070.806 | 33587.583   | 33709.649 | 25875.503 | 49233.215   | 37260.629   | 12561.219 | 25612.258 | 37053.753   | 86611.514  | 46572.456 | 15694.337 | 55032.958 | 15333.022 |
| 2015 | 36836.426 | 35760.734   | 35028.301 | 27116.576 | 50302.068   | 37475.178   | 12945.252 | 26856.065 | 37715.362   | 89007.461  | 48436.975 | 16293.610 | 56803.472 | 15802.705 |
| 2016 | 39045.168 | 37142.833   | 36715.845 | 28185.539 | 51338.573   | 39122.542   | 13404.222 | 27735.351 | 38383.036   | 91452.043  | 49084.066 | 16961.266 | 57904.202 | 16343.491 |
| 2017 | 40981.282 | 38824.115   | 39037.378 | 30004.079 | 54422.008   | 40438.571   | 13772.290 | 29930.992 | 39006.391   | 96552.603  | 51404.785 | 17917.207 | 59927.93  | 17136.637 |
| 2018 | 42080.426 | 40479.346   | 40854.581 | 31698.371 | 56772.036   | 41702.518   | 14393.452 | 32356.522 | 39470.856   | 101352.577 | 53119.706 | 19017.736 | 62641.014 | 17971.072 |

Source of PPP: [https://data.worldbank.org/indicator/NY.GDP.PCAP.PP.CD?end=2018&name\\_desc=false&start=2009](https://data.worldbank.org/indicator/NY.GDP.PCAP.PP.CD?end=2018&name_desc=false&start=2009)

**Appendix A12 (References included in this review)**

1. Ka-Hing W, Shui-Shan L, Kelvin HKL, and Wai-Yee W, Temporal Trend and Factors Associated with Late HIV Diagnosis in Hong Kong, a Low HIV Prevalence Locality. *AIDS Patient Care STDS* 2003; **17**(9): 461-469.
2. McDonald EA, Currie MJ, Bowden FJ. Delayed diagnosis of HIV: Missed opportunities and triggers for testing in the Australian Capital Territory. *Sexual Health* 2006; **3**(4): 291-5.
3. Kivelä PS, Krol A, Salminen MO, Ristola MA. Determinants of late HIV diagnosis among different transmission groups in Finland from 1985 to 2005. *HIV Medicine* 2010; **11**(6): 360-7.
4. Girardi E, Sampaolesi A, Gentile M, Nurra G, Ippolito G. Increasing proportion of late diagnosis of HIV infection among patients with AIDS in Italy following introduction of combination antiretroviral therapy. *Journal of Acquired Immune Deficiency Syndromes* 2000; **25**(1): 71-6.
5. Spornraft-Ragaller P, Boashie U, Stephan V, Schmitt J. Analysis of risk factors for late presentation in a cohort of HIV-infected patients in Dresden: Positive serology for syphilis in MSM is a determinant for earlier HIV diagnosis. *Infection* 2013; **41**(6): 1145-55.
6. Carnicer-Pont D, de Olalla PG, Cayla JA, Grp AW. HIV Infection Late Detection in AIDS Patients of an European City with Increased Immigration Since Mid 1990s. *Current HIV Research* 2009; **7**(2): 237-43.
7. Castilla J, Sobrino P, De La Fuente L, Noguer I, Guerra L, Parras F. Late diagnosis of HIV infection in the era of highly active antiretroviral therapy: Consequences for AIDS incidence. *AIDS* 2002; **16**(14): 1945-51.
8. Lemoh C, Guy R, Yohannes K, et al. Delayed diagnosis of HIV infection in Victoria 1994 to 2006. *Sexual Health* 2009; **6**(2): 117-22.
9. Jiang HB, Xie NH, Fan YZ, et al. Risk Factors for Advanced HIV Disease and Late Entry to HIV Care: National 1994-2012 HIV Surveillance Data for Wuhan, China. *AIDS Patient Care and STDs* 2015; **29**(10): 541-9.
10. Helleberg M, Engsig FN, Kronborg G, et al. Late presenters, repeated testing, and missed opportunities in a Danish nationwide HIV cohort. *Scandinavian Journal of Infectious Diseases* 2012; **44**(4): 282-8.
11. Longo B, Pezzotti P, Boros S, Urciuoli R, Rezza G. Increasing proportion of late testers among AIDS cases in Italy, 1996-2002. *AIDS Care - Psychological and Socio-Medical Aspects of AIDS/HIV* 2005; **17**(7): 834-41.
12. Delpierre C, Cuzin L, Lauwers-Cances V, et al. High-risk groups for late diagnosis of HIV infection: A need for rethinking testing policy in the general population. *AIDS Patient Care and STDs* 2006; **20**(12): 838-47.
13. Tey JSH, Ang LW, Tay J, et al. Determinants of late-stage HIV disease at diagnosis in Singapore, 1996 to 2009. *Annals of the Academy of Medicine Singapore* 2012; **41**(5): 194-9.

14. Op De Coul ELM, Van Sighem A, Brinkman K, et al. Factors associated with presenting late or with advanced HIV disease in the Netherlands, 1996-2014: Results from a national observational cohort. *BMJ Open* 2016; **6**(1): 1-10.
15. Teira Cobo R, Suárez Lozano I, Santamaría Jáuregui JM, et al. [Delayed diagnosis of HIV infection in the Spanish VACH cohort [1997-2002]] (in Spanish). *Gaceta Sanitaria* 2007; **21**(1): 66-9.
16. Ndiaye B, Salleron J, Vincent A, et al. Factors associated with presentation to care with advanced HIV disease in Brussels and Northern France: 1997-2007. *BMC Infectious Diseases* 2011; **11**: 11.
17. Lee CY, Jen IA, Lan YC, et al. AIDS incidence trends at presentation and during follow-up among HIV-at-risk populations: a 15-year nationwide cohort study in Taiwan. *Bmc Public Health* 2018; **18**(1): 589.
18. Manavi K, McMillan A, Ogilvie M, Scott G. Heterosexual men and women with HIV test positive at a later stage of infection than homo- or bisexual men. *International Journal of STD and AIDS* 2004; **15**(12): 811-4.
19. Maquera-Afaray J, Cvetkovic-Vega A, Cardenas MM, Kalviainen H, Mejia CR. [Late diagnosis and advanced disease of HIV in adult patients from a Peruvian social security hospital] (in Spanish). *Revista chilena de infectologia: organo oficial de la Sociedad Chilena de Infectologia* 2016; **33**(Suppl 1): 20-6.
20. Wright ST, Law MG, Cooper DA, et al. Temporal trends of time to antiretroviral treatment initiation, interruption and modification: Examination of patients diagnosed with advanced HIV in Australia. *Journal of the International AIDS Society* 2015; **18**(1): 19463.
21. Wohl AR, Tejero J, Frye DM. Factors associated with late HIV testing for Latinos diagnosed with AIDS in Los Angeles. *AIDS care* 2009; **21**(9): 1203-10.
22. Rurangirwa J, Bingham TA, Kim J, Hu YW, Bing EG. Late HIV detection among adult males in Los Angeles County, 2000-2004. *AIDS Care - Psychological and Socio-Medical Aspects of AIDS/HIV* 2013; **25**(4): 481-7.
23. Tang JJ, Levy V, Hernandez MT. Who are California's late HIV testers? An Analysis of State AIDS surveillance data, 2000-2006. *Public Health Reports* 2011; **126**(3): 338-43.
24. Lee JH, Kim GJ, Choi BS, et al. Increasing late diagnosis in HIV infection in South Korea: 2000-2007. *BMC public health* 2010; **10**: 411.
25. Yang BR, Chan SK, Mohammad N, et al. Late HIV diagnosis in Houston/Harris County, Texas, 2000-2007. *AIDS Care-Psychological and Socio-Medical Aspects of AIDS/HIV* 2010; **22**(6): 766-74.
26. Saganic L, Carr J, Solorio R, Courogen M, Jaenicke T, Duerr A. Comparing Measures of Late HIV Diagnosis in Washington State. *AIDS Research and Treatment* 2012; **2012**: 182672.
27. Tossas-Milligan KY, Hunter-Mellado RF, Mayor AM, Fernandez-Santos DM, Dworkin MS. Late HIV Testing in a Cohort of HIV-Infected Patients in Puerto Rico. *Puerto Rico Health Sciences Journal* 2016; **35**(2): 113-21.

28. Mocroft A, Lundgren JD, Sabin ML, et al. Risk Factors and Outcomes for Late Presentation for HIV-Positive Persons in Europe: Results from the Collaboration of Observational HIV Epidemiological Research Europe Study (COHERE). *Plos Medicine* 2013; **10**(9): e1001510.
29. Duffus WA, Weis K, Kettinger L, Stephens T, Albrecht H, Gibson JJ. Risk-Based HIV Testing in South Carolina Health Care Settings Failed to Identify the Majority of Infected Individuals. *AIDS Patient Care and STDs* 2009; **23**(5): 339-45.
30. Li X, Zhu ZP, Li XS, et al. [Epidemiological characteristics of HIV/AIDS among people aged 50 and above in Nanjing City] (in Chinese). *Occupation and Health* 2018; **34**(12): 1651-3.
31. Delpierre C, Dray-Spira R, Cuzin L, et al. Correlates of late HIV diagnosis: Implications for testing policy. *International Journal of STD and AIDS* 2007; **18**(5): 312-7.
32. Kundro MA, Terwel SR, Toibaro JJ, Vilorio GA, Losso MH. Late diagnosis of HIV infection in asymptomatic patients. *Medicina (Argentina)* 2016; **76**(5): 273-8.
33. Colucci A, Balzano R, Camoni L, et al. Characteristics and behaviors in a sample of patients unaware of their infection until AIDS diagnosis in Italy: A cross-sectional study. *AIDS Care - Psychological and Socio-Medical Aspects of AIDS/HIV* 2011; **23**(9): 1067-75.
34. Oliva J, Galindo S, Vives N, et al. [Delayed diagnosis of HIV infection in Spain] (in Spanish). *Enfermedades Infecciosas y Microbiología Clínica* 2010; **28**(9): 583-9.
35. Leutscher PDC, Laursen T, Andersen B, Østergaard L, Laursen A, Larsen CS. HIV late presenters in Denmark - need for increased diagnostic awareness among general practitioners. *Danish Medical Bulletin* 2011; **58**(4): A4253.
36. Jeong SJ, Italiano C, Chaiwarith R, et al. Late Presentation into Care of HIV Disease and Its Associated Factors in Asia: Results of TAHOD. *AIDS Research and Human Retroviruses* 2016; **32**(3): 255-61.
37. Sobrino-Vegas P, Miguel LGS, Caro-Murillo AM, et al. Delayed Diagnosis of HIV Infection in a Multicenter Cohort: Prevalence, Risk Factors, Response to HAART and Impact on Mortality. *Current HIV Research* 2009; **7**(2): 224-30.
38. Sobrino-Vegas P, Moreno S, Rubio R, et al. Impact of late presentation of HIV infection on short-, mid- and long-term mortality and causes of death in a multicenter national cohort: 2004-2013. *Journal of Infection* 2016; **72**(5): 587-96.
39. Liu ZQ. [Late diagnosis of HIV/AIDS and its influencing factors in Tianjin in 2004-2015] (in Chinese). *Chinese Journal of Preventive Medicine* 2016; **17**(12): 925-8.
40. Dickson NP, McAllister S, Sharples K, Paul C. Late presentation of HIV infection among adults in New Zealand: 2005-2010. *HIV Medicine* 2012; **13**(3): 182-9.
41. Sun L, Wei ZY, Cao Y. [Analysis on the characteristics of late diagnosis of HIV/AIDS patients in Yangzhou] (in Chinese). *Chinese Journal of AIDS & STD* 2017; **23**(11): 1010-2.
42. Zhang NN, Song MM, Liu DY, Yu SQ. [Analysis on the late diagnosed HIV/AIDS cases reported during 2005-2015 in Weifang city] (in Chinese). *Chinese Journal of AIDS & STD* 2017; **23**(7): 609-12.

43. Kiertiburanakul S, Boonyarattaphun K, Atamasirikul K, Sungkanuparph S. Clinical presentations of newly diagnosed HIV-infected patients at a university hospital in Bangkok, Thailand. *Journal of the International Association of Physicians in AIDS Care (Chicago, Ill : 2002)* 2008; **7**(2): 82-7.
44. Lo YC, Wu PY, Hsieh CY, et al. Late Diagnosis of Human Immunodeficiency Virus Infection in the Era of Highly Active Antiretroviral Therapy: Role of Socio-behavioral Factors and Medical Encounters. *Journal of the Formosan Medical Association* 2011; **110**(5): 306-15.
45. Pyziak-Kowalska KA, Dusza M, Mularska E, et al. Late presenters among newly diagnosed HIV-infected in Poland in 2006-2008. *HIV and AIDS Review* 2017; **16**(4): 244-50.
46. Mao LC, Zhang ZK, Zhang QJ, Wei XQ, Cao HZ, Wang XL. [Analysis of the late diagnosis and its influential factors by newly diagnosed cases in Tangshan] (in Chinese). *Chinese Journal of AIDS & STD* 2017; **23**(3): 267-8.
47. Trepka MJ, Fennie KP, Sheehan DM, Lutfi K, Maddox L, Lieb S. Late HIV diagnosis: Differences by rural/urban residence, Florida, 2007-2011. *AIDS Patient Care and STDs* 2014; **28**(4): 188-97.
48. Oliva J, Díez M, Galindo S, et al. Predictors of advanced disease and late presentation in new HIV diagnoses reported to the surveillance system in Spain. *Gaceta sanitaria / SESPAS* 2014; **28**(2): 116-22.
49. Bai F, Tincati C, Merlini E, et al. Reduced Central Memory CD4+ T Cells and Increased T-Cell Activation Characterise Treatment-Naive Patients Newly Diagnosed at Late Stage of HIV Infection. *AIDS Research and Treatment* 2012; **2012**: 314849.
50. Valentini MB, de Toledo MLG, Fonseca MO, et al. Evaluation of late presentation for HIV treatment in a reference center in Belo Horizonte, Southeastern Brazil, from 2008 to 2010. *Brazilian Journal of Infectious Diseases* 2015; **19**(3): 253-62.
51. Tang HL, Mao YR, Zhang TJ, Han J, He N. [Analysis on late diagnosis reasons of newly diagnosed HIV/AIDS patients] (in Chinese). *Chinese Journal of Preventive Medicine* 2012; **46**(11): 1004-8.
52. Dai SY, Liu JJ, Fan YG, et al. Prevalence and factors associated with late HIV diagnosis. *Journal of Medical Virology* 2015; **87**(6): 970-7.
53. Hall HI, Halverson J, Wilson DP, et al. Late diagnosis and entry to care after diagnosis of human immunodeficiency virus infection: A country comparison. *PLoS ONE* 2013; **8**(11): e77763.
54. Jin X, Xiong R, Wang LY, Mao YR. [Analysis on the 'late diagnosis' (LD) phenomena among newly identified HIV/AIDS cases in China, 2010-2014] (in Chinese). *Chinese Journal of Epidemiology* 2016; **37**(2): 218-21.
55. Levy I, Maor Y, Mahroum N, et al. Missed opportunities for earlier diagnosis of HIV in patients who presented with advanced HIV disease: A retrospective cohort study. *BMJ Open* 2016; **6**(11): e012721.
56. Lin ZM, Li Y, Fu XB, et al. [Characteristics and influencing factors for late diagnosed HIV/AIDS cases in Guangdong Province] (in Chinese). *South China Journal of Preventive Medicine* 2017; **43**(6): 501-6.

57. Qi Y, Cui Q. [Analysis of epidemiological characteristics of HIV/AIDS and influencing factors of late diagnosis in Yancheng] (in Chinese). *Jiangsu Journal of Preventive Medicine* 2015; **26**(2): 24-8.
58. Jin L, Cheng XL, Qin YZ, Su B. [Analysis of the influential factors of late diagnosis among newly identified HIV/AIDS cases in Anhui Province, 2011-2015] (in Chinese). *Chinese Journal of Preventive Medicine* 2018; **52**(4): 415-8.
59. Guo Y, Ning TL, Zhou N. [The characteristics of late diagnosed HIV/AIDS cases in Tianjin from 2011 to 2015 and its influencing factors] (in Chinese). *The Chinese Journal of Human Sexuality* 2017; **26**(7): 77-80.
60. Li JZ, Ren QY, Li XR. [Analysis on the characteristics and associated factors of late diagnosed HIV/AIDS cases during 2011-2016 in Jinnan city] (in Chinese). *Chinese Journal of Preventive Medicine* 2018: 2-6.
61. Zhang HL, Wei XL, Zhao X, Zheng HC. [Influencing factors of late diagnosis of newly identified HIV/AIDS cases in Xi'an, 2011-2017] (in Chinese). *China Tropical Medicine* 2018; **18**(8): 799-803.
62. Pan X, Chen L, Xu Y, Xia Y, Guo Z, Yang J. [Characteristics and influencing factors of HIV detection among HIV/AIDS patients in Zhejiang province in 2012] (in Chinese). *Chinese Journal of Preventive Medicine* 2014; **48**(5): 380-5.
63. Senard O, Burdet C, Visseaux B, et al. Epidemiological Profile of Newly Diagnosed HIV-Infected Patients in Northern Paris: A Retrospective Study. *AIDS Research and Human Retroviruses* 2017; **33**(1): 11-6.
64. Chkhartishvili N, Chokoshvili O, Bolokadze N, et al. Late presentation of HIV infection in the country of Georgia: 2012-2015. *PLoS ONE* 2017; **12**(10): e0186835.
65. Li X, Xu YY, Li XS, et al. [HIV epidemic status in China Comprehensive AIDS Response pilot area in Nanjing City from 2012 to 2016] (in Chinese). *Journal of Medical Pest Control* 2017; **33**(10): 1031-4.
66. Fakoya I, Alvarez-Del Arco D, Monge S, et al. HIV testing history and access to treatment among migrants living with HIV in Europe. *Journal of the International AIDS Society* 2018; **21**(Suppl 4): e25123.
67. Meng Q, Zhu QY, Zhou XJ, Tang ZZ, Shen ZY. [Epidemiological characteristics of late diagnosed HIV/AIDS cases of 2014 in Guangxi] (in Chinese). *Chinese Journal of AIDS & STD* 2016; **22**(4): 282-4.
68. Cuzin L, Yazdanpanah Y, Huleux T, et al. No relationship between late HIV diagnosis and social deprivation in newly diagnosed patients in France. *HIV Medicine* 2018; **19**(3): 238-42.
69. Chen ZB, Tong L. [Analysis of late detection rate and influencing factors of HIV infections in Shunde District of Foshan City in 2016] (in Chinese). *China Modern Medicine* 2017; **24**(20): 154-6.
70. Wilson KdA, Dray-Spira R, Aubriere C, et al. Frequency and correlates of late presentation for HIV infection in France: older adults are a risk group - results from the ANRS-VESPA2 Study, France. *AIDS Care-Psychological and Socio-Medical Aspects of AIDS/HIV* 2014; **26**: S83-93.

71. Toure A, Khanafer N, Baratin D, et al. First presentation for care of HIV-infected patients with low CD4 cell count in Lyon, France: Risk factors and consequences for survival. *AIDS Care-Psychological and Socio-Medical Aspects of AIDS/HIV* 2012; **24**(10): 1272-6.
72. Siwak E, Horban A, Witak-Jedra M, et al. Long-term trends in HIV care entry: over 15 years of clinical experience from Poland. *HIV medicine* 2019; **20**(9): 581-90.
73. Schwarcz S, Hsu L, Dilley JW, Loeb L, Nelson K, Boyd S. Late diagnosis of HIV infection - Trends, prevalence, and characteristics of persons whose HIV diagnosis occurred within 12 months of developing AIDS. *Jaids-Journal of Acquired Immune Deficiency Syndromes* 2006; **43**(4): 491-4.
74. Mena M, Magnani C, Villa M, et al. Characterisation of AIDS presenters and their response to antiretroviral therapy at Legnano general hospital (Italy) during the period 2000-2008. *New Microbiologica* 2010; **33**(3): 207-14.
75. McDonald AM, Li YM, Dore GJ, Ree H, Kaldor JM. Late HIV presentation among AIDS cases in Australia, 1992-2001. *Australian and New Zealand Journal of Public Health* 2003; **27**(6): 608-13.
76. Lim CL, Kumar S. Trends in baseline CD4 count at presentation to care among HIV-positive patients in Sungai Buloh Hospital, Malaysia. *HIV and AIDS Review* 2019; **18**(2): 85-91.
77. Lanoy E, Mary-Krause M, Tattevin P, et al. Frequency, determinants and consequences of delayed access to care for HIV infection in France. *Antiviral Therapy* 2007; **12**(1): 89-96.
78. Hu X, Liang B, Zhou C, et al. HIV late presentation and advanced HIV disease among patients with newly diagnosed HIV/AIDS in Southwestern China: a large-scale cross-sectional study. *AIDS Research and Therapy* 2019; **16**(1): 6.
79. de Munain JL, Camara MM, Santamaria JM, Zubero Z, Baraia-Etxaburu J, Munoz J. Clinical and epidemiological characteristics of persons newly diagnosed of HIV infection. *Medicina Clinica* 2001; **117**(17): 654-6.
80. Chen K-T, Chang H-L, Chen C-T, Chen Y-A. The Changing Face of the HIV Epidemic in Taiwan: A New Challenge for Public Health Policy Strategies. *AIDS Patient Care and STDs* 2009; **23**(3): 195-201.
81. Centers for Disease C, Prevention. Late HIV testing - 34 states, 1996-2005. *Morbidity and Mortality Weekly Report* 2009; **58**(24): 661-5.
82. Castilla J, Lorenzo JM, Izquierdo A, et al. Characteristics and trends of newly diagnosed HIV-infections, 2000-2004. *Gaceta Sanitaria* 2006; **20**(6): 442-8.
83. Reinhardt S, Spec A, Melendez J, et al. Aids-defining illnesses at initial diagnosis of HIV in a large guatemalan cohort. *Open Forum Infectious Diseases* 2016; **4**(4): ofx249.
84. Brannstrom J, Akerlund B, Arneborn M, Blaxhult A, Giesecke J. Patients unaware of their HIV infection until AIDS diagnosis in Sweden 1996-2002--a remaining problem in the highly active antiretroviral therapy era. *International journal of STD & AIDS* 2005; **16**(10): 702-6.

85. Tianfa L, Zhiqiang L, Zeming L, Huiying Z. [Analysis of the situation and influential factors of late diagnosis among newly reported HIV/AIDS cases in Ruijin from 2005 to 2018] (in Chinese). *Applied Preventive Medicine* 2019; **25**(2): 99-102.
86. Liyue C, Shifu L, Ying C, et al. [Analysis on the situation of late diagnosis and relevant impact factors of newly reported HIV cases in Yuxi prefecture from 2006 to 2017] (in Chinese). *Modern Preventive Medicine* 2018; **45**(20): 3794-7.
87. Min Z, Yuanying S, Jizheng L. [Epidemiological characteristics of late diagnosis of HIV/AIDS cases in DaLi city from 2011 to 2017] (in Chinese). *Chinese Journal of AIDS & STD* 2019; **25**(1): 79-81.
88. Hongmei L, Xiaoyong N, Shengcai M, et al. [Late diagnosis of newly identified HIV/AIDS cases and its influencing factors in Shanxi, 2011-2016] (in Chinese). *Chinese Journal of AIDS & STD* 2018; **24**(11): 1097-100.
89. Hai X, Fei H, Xiuran P, Shide M, Chongmei W, Yan L. [Analysis of the influencing factors of late diagnosis in Fangchenggang city from 2012 to 2016] (in Chinese). *Applied Preventive Medicine* 2018; **24**(1): 43-6.
90. Heng T, Xingfu S, Wei Z, Honglin J. [Characteristics and influencing factors of late-diagnosed cases among newly reported sexually transmitted HIV/AIDS cases in Hubei Province, 2012-2016] (in Chinese). *Practical Preventive Medicine* 2018; **25**(9): 1025-8.
91. Kai Y, Guoping P, Honglin J, heng T. [Analysis of epidemiological characteristics of newly reported HIV/AIDS patients in Hubei Province (2016-2017)] (in Chinese). *Journal of Preventive Medicine & Public Health* 2019; **30**(2): 123-5.
92. Yin X, Ying L, Hongda L, Jianmei T. [Influencing factors of late diagnosis for newly identified HIV/AIDS cases in Jiangyin City and prediction model] (in Chinese). *Occupation and Health* 2019; **35**(8): 1086-9.
93. Yalan H, Qiuting C, Juane X, Cangtao H. [Characteristics and influencing factors of Late diagnosis of HIV/AIDS in Quanzhou city from 2011 to 2017] (in Chinese). *Strait Journal of Preventive Medicine* 2018; **24**(5): 26-9.
94. Zuokai Y, Hui W, Yirong F, Xiangling L, Xingren S. [Analysis on characteristics of newly reported HIV/AIDS cases in Shaoxing] (in Chinese). *Preventive Medicine* 2019; **31**(6): 603-5.
95. Zairan D, Jian W, bo L, Li Z. [Characteristics and Influencing Factors of Late Detected HIV/AIDS Cases Between 2012 and 2016 in Hejiang County of Sichuan Province] (in Chinese). *The Chinese Journal of Dermatovenereology* 2018; **32**(9): 1047-51.
96. Pengfei B, Yanqiu Z, Xiuping Z, Zhuohua F. [Situation and influencing factors of HIV cases in Suzhou from 2012-2017] (in Chinese). *Jiangsu Journal of Preventive Medicine* 2018; **29**(5): 522-40.
97. Qingsong X, Liying C, Xiaohua Z, Ting Q. [Proportion and influencing factors of late diagnosis of HIV/AIDS cases in Xiangcheng district, Suzhou] (in Chinese). *Jiangsu Journal of Preventive Medicine* 2018; **29**(2): 182-205.
98. Zhenghong Z, Yanjiao F, Zhengdong D, Yuying L, Guoming C, Min Z. [Status and influencing factors on late diagnosis of HIV/AIDS among newly identified cases in



- Wuhu city from 2013 to 2017] (in Chinese). *Chinese Journal of AIDS & STD* 2019; **25**(7): 702-5.
99. Lu Y, Minghui Z, Chengfeng H, Yun W, Chao L, Xiaoxia L. [Characteristics and influencing factors on Late diagnosis of HIV/AIDS in ZhenJiang city from 2010-2017] (in Chinese). *Jiangsu Journal of Preventive Medicine* 2018; **29**(5): 514-7.
100. Yong Z, Fengxun M, Weidong W, Xuejun H, Jianping Q, Sheng L. [Analysis on the characteristics of delayed diagnosis of HIV/AIDS cases in Rongchang district of Chongqing from 2012 to 2017] (in Chinese). *Chinese Journal of AIDS & STD* 2019; **25**(1): 37-9.
101. Shanzi H, Yi Z, Xiaofeng L, Wei L. [Analysis on influencing factors of late diagnosed AIDS cases in Zhuhai] (in Chinese). *Journal of Tropical Medicine* 2018; **18**(9): 1246-9.
