# Supplementary material for: Different transmission routes and the risk of advanced HIV disease: A systematic review and network meta-analysis of observational studies
Source: PubMed Central journal article supplement — eClinicalMedicine. 2019 Nov 2;16:121–8. doi: 10.1016/j.eclinm.2019.10.003 (PMC6890975; doi:10.1016/j.eclinm.2019.10.003), 2019-11-02
Supplement: mmc2.pdf [file mmc2.pdf]

Table 1: Detailed information of included studies in this review continued to Appendix A3.3.1 Table 1: Characteristics of included studies in this review (continued)

| No. of study | study period | Median study period | Study             | Region           | Study method  | Time lag | Definition of advanced HIV disease (AHD)                                                                                                                                                                                                                                                                                                                                                                                                                                                                                                                                                             | No. of AHD via MSM | No. of PLHIV via MSM | No. of AHD via IDU | No. of PLHIV via IDU | No. of AHD via HC | No. of PLHIV via HC | No. of AHD | No. of PLHIV | No. of male | No. of female | Age    | Continents    |
|--------------|--------------|---------------------|-------------------|------------------|---------------|----------|------------------------------------------------------------------------------------------------------------------------------------------------------------------------------------------------------------------------------------------------------------------------------------------------------------------------------------------------------------------------------------------------------------------------------------------------------------------------------------------------------------------------------------------------------------------------------------------------------|--------------------|----------------------|--------------------|----------------------|-------------------|---------------------|------------|--------------|-------------|---------------|--------|---------------|
| 78           | 2012-2016    | 2014                | 2019 Hu X         | China (Mainland) | cross-section | 3        | advanced HIV disease was defined as a patient with a CD4+ T-cell count < 200/mm <sup>3</sup> , or a patient with an AIDS-defining illness regardless of CD4+ T-cell count during diagnosis                                                                                                                                                                                                                                                                                                                                                                                                           | 332                | 1439                 | 347                | 1077                 | 19526             | 41994               | 20325      | 45118        | 32028       | 13900         | 50.3   | Asia          |
| 79           | 1998-2000    | 1999                | 2001 de Manain JL | Spain            | surveillance  | 0        | late diagnosis (stage C) was defined according to CD4 cell count at diagnosis                                                                                                                                                                                                                                                                                                                                                                                                                                                                                                                        | 15                 | 46                   | 8                  | 32                   | 22                | 47                  | 45         | 125          | NA          | NA            | 37.3   | Europe        |
| 80           | 1990-2005    | 1997.5              | 2009 Chen KT      | China (Taiwan)   | surveillance  | 3        | Persons with HIV were those who received a diagnosis of HIV with or without a diagnosis of AIDS at the same time. Persons with AIDS were those who had AIDS when they first received their HIV diagnosis, or those who progressed to having AIDS after first being reported with HIV infection. The diagnosis year for HIV diagnosis was the year of HIV diagnosis if AIDS was not contemporaneously present, but if HIV and AIDS were diagnosed within the same calendar month, it was the year of AIDS diagnosis. For people with AIDS, the year of AIDS diagnosis was used as the diagnosis year. | 1154               | 3807                 | 90                 | 3240                 | 1114              | 2734                | 2589       | 9961         | 9104        | 857           | 32     | Asia          |
| 81           | 1998-2005    | 2001.5              | 2009 Shouse RL    | USA              | surveillance  | 12       | AIDS diagnosis after 1 year HIV diagnosis                                                                                                                                                                                                                                                                                                                                                                                                                                                                                                                                                            | 40994              | 100231               | 12887              | 32154                | 22766             | 61101               | 107784     | 281421       | 200882      | 80559         | NA     | North America |
| 82           | 2000-2004    | 2002                | 2006 Castilla J   | Spain            | surveillance  | NA       | Patients with CD4+ lymphocyte count lower than 200 cells per microlitre and those who already presented signs of an AIDS defining disease were considered late diagnoses of HIV infection.                                                                                                                                                                                                                                                                                                                                                                                                           | 144                | 353                  | 117                | 299                  | 316               | 669                 | 616        | 1407         | 1071        | 336           | 37     | Europe        |
| 83           | 2015-2015    | 2015                | 2016 Reinhardt S  | Guatemala        | cohort        | 0        | Baseline AIDS-defining illnesses                                                                                                                                                                                                                                                                                                                                                                                                                                                                                                                                                                     | 87                 | 464                  | NA                 | NA                   | 832               | 3174                | 931        | 3086         | 2133        | 1553          | 34.4   | South America |
| 84           | 1996-2002    | 1999                | 2005 Brannstrom J | Sweden           | surveillance  | 3        | A "late tester" was defined as a patient with AIDS where the time interval between first positive HIV test and AIDS diagnosis within 3 month                                                                                                                                                                                                                                                                                                                                                                                                                                                         | 77                 | 166                  | 6                  | 65                   | 116               | 224                 | 219        | 487          | 360         | 127           | ≥15    | Europe        |
| 85           | 2005-2018    | 2011.5              | 2019 Luo TF       | China (Mainland) | surveillance  | NA       | (1) The HIV/AIDS patients died from non-accidental causes.<br>(2) Regardless of its surviving or not, the HIV/AIDS patients with CD4 count less than 200 $\mu$ l, were included.<br>(3) The patients were diagnosed as AIDS with CD4 count between 200 and 499 $\mu$ l.<br>(4) The patients were diagnosed as AIDS by clinicians without CD4 count test.<br>(5) Based on the inference of existing data, a portion of patients was considered as AIDS without clinical diagnosis or CD4 count test.                                                                                                  | 6                  | 28                   | NA                 | NA                   | 312               | 576                 | 320        | 608          | 442         | 166           | NA     | Asia          |
| 86           | 2006-2017    | 2011.5              | 2018 Chen LY      | China (Mainland) | surveillance  | NA       | AIDS diagnosis at HIV diagnosis or within the calendar year among newly diagnosed cases                                                                                                                                                                                                                                                                                                                                                                                                                                                                                                              | 23                 | 96                   | 54                 | 246                  | 472               | 1790                | 549        | 2132         | 1254        | 878           | ≥18    | Asia          |
| 87           | 2011-2017    | 2014                | 2019 Zhang M      | China (Mainland) | surveillance  | NA       | (1) The HIV/AIDS patients died from non-accidental causes.<br>(2) Regardless of its surviving or not, the HIV/AIDS patients with CD4 count less than 200 $\mu$ l, were included.<br>(3) The patients were diagnosed as AIDS with CD4 count between 200 and 499 $\mu$ l.<br>(4) The patients were diagnosed as AIDS by clinicians without CD4 count test.<br>(5) Based on the inference of existing data, a portion of patients was considered as AIDS without clinical diagnosis or CD4 count test.                                                                                                  | 11                 | 63                   | 130                | 267                  | 444               | 1198                | 592        | 1562         | 1038        | 524           | 46.75  | Asia          |
| 88           | 2011-2016    | 2013.5              | 2018 Liang HM     | China (Mainland) | surveillance  | NA       | (1) The HIV/AIDS patients died from non-accidental causes.<br>(2) Regardless of its surviving or not, the HIV/AIDS patients with CD4 count less than 200 $\mu$ l, were included.<br>(3) The patients were diagnosed as AIDS with CD4 count between 200 and 499 $\mu$ l.<br>(4) The patients were diagnosed as AIDS by clinicians without CD4 count test.<br>(5) Based on the inference of existing data, a portion of patients was considered as AIDS without clinical diagnosis or CD4 count test.                                                                                                  | 542                | 2162                 | NA                 | NA                   | 1181              | 2764                | 1885       | 5213         | 4357        | 856           | 36.567 | Asia          |
| 89           | 2012-2016    | 2014                | 2018 Xie H        | China (Mainland) | surveillance  | NA       | (1) The HIV/AIDS patients died from non-accidental causes.<br>(2) Regardless of its surviving or not, the HIV/AIDS patients with CD4 count less than 200 $\mu$ l, were included.<br>(3) The patients were diagnosed as AIDS with CD4 count between 200 and 499 $\mu$ l.<br>(4) The patients were diagnosed as AIDS by clinicians without CD4 count test.<br>(5) Based on the inference of existing data, a portion of patients was considered as AIDS without clinical diagnosis or CD4 count test.                                                                                                  | 4                  | 27                   | 9                  | 19                   | 662               | 1324                | 679        | 1387         | 977         | 410           | NA     | Asia          |
| 90           | 2012-2016    | 2014                | 2018 Tang H       | China (Mainland) | surveillance  | NA       | (1) The HIV/AIDS patients died from non-accidental causes.<br>(2) Regardless of its surviving or not, the HIV/AIDS patients with CD4 count less than 200 $\mu$ l, were included.<br>(3) The patients were diagnosed as AIDS with CD4 count between 200 and 499 $\mu$ l.<br>(4) The patients were diagnosed as AIDS by clinicians without CD4 count test.<br>(5) Based on the inference of existing data, a portion of patients was considered as AIDS without clinical diagnosis or CD4 count test.                                                                                                  | 1272               | 4926                 | NA                 | NA                   | 3236              | 6906                | 4508       | 11832        | 9679        | 2153          | ≥15    | Asia          |
| 91           | 2016-2017    | 2016.5              | 2019 Yang K       | China (Mainland) | surveillance  | NA       | Late diagnosis was defined as the first CD4 cell count < 200/mm <sup>3</sup> within the calendar year for diagnosis                                                                                                                                                                                                                                                                                                                                                                                                                                                                                  | 644                | 2459                 | 14                 | 23                   | 1293              | 3323                | 1953       | 5826         | 4748        | 1078          | 43     | Asia          |
| 92           | 2007-2017    | 2012                | 2019 Xu Y         | China (Mainland) | surveillance  | NA       | (1) The HIV/AIDS patients died from non-accidental causes.<br>(2) Regardless of its surviving or not, the HIV/AIDS patients with CD4 count less than 200 $\mu$ l, were included.<br>(3) The patients were diagnosed as AIDS with CD4 count between 200 and 499 $\mu$ l.<br>(4) The patients were diagnosed as AIDS by clinicians without CD4 count test.<br>(5) Based on the inference of existing data, a portion of patients was considered as AIDS without clinical diagnosis or CD4 count test.                                                                                                  | 149                | 412                  | 1                  | 35                   | 37                | 181                 | 187        | 628          | 532         | 96            | 37.56  | Asia          |
| 93           | 2011-2017    | 2014                | 2018 Huang YL     | China (Mainland) | surveillance  | NA       | (1) The HIV/AIDS patients died from non-accidental causes.<br>(2) AIDS diagnosis at HIV diagnosis or within the calendar year among newly diagnosed cases                                                                                                                                                                                                                                                                                                                                                                                                                                            | 139                | 537                  | 9                  | 28                   | 745               | 1966                | 901        | 2551         | 2071        | 480           | NA     | Asia          |
| 94           | 2015-2017    | 2016                | 2019 Yang ZK      | China (Mainland) | surveillance  | NA       | (1) The HIV/AIDS patients died from non-accidental causes.<br>(2) Regardless of its surviving or not, the HIV/AIDS patients with CD4 count less than 200 $\mu$ l, were included.<br>(3) The patients were diagnosed as AIDS with CD4 count between 200 and 499 $\mu$ l.<br>(4) The patients were diagnosed as AIDS by clinicians without CD4 count test.<br>(5) Based on the inference of existing data, a portion of patients was considered as AIDS without clinical diagnosis or CD4 count test.                                                                                                  | 56                 | 241                  | NA                 | NA                   | 137               | 494                 | 202        | 776          | 626         | 150           | 39.32  | Asia          |
| 95           | 2012-2016    | 2014                | 2019 Duan RR      | China (Mainland) | surveillance  | NA       | (1) The HIV/AIDS patients died from non-accidental causes.<br>(2) Regardless of its surviving or not, the HIV/AIDS patients with CD4 count less than 200 $\mu$ l, were included.<br>(3) The patients were diagnosed as AIDS with CD4 count between 200 and 499 $\mu$ l.<br>(4) The patients were diagnosed as AIDS by clinicians without CD4 count test.<br>(5) Based on the inference of existing data, a portion of patients was considered as AIDS without clinical diagnosis or CD4 count test.                                                                                                  | 10                 | 53                   | 2                  | 6                    | 269               | 632                 | 282        | 693          | 598         | 185           | 53     | Asia          |
| 96           | 2012-2017    | 2014.5              | 2018 Bing PF      | China (Mainland) | surveillance  | NA       | Late diagnosis was defined as newly diagnosed and the first CD4 cell count < 200/mm <sup>3</sup> within the calendar year for diagnosis                                                                                                                                                                                                                                                                                                                                                                                                                                                              | 448                | 2336                 | NA                 | NA                   | 368               | 1208                | 820        | 3405         | 3239        | 366           | 35.36  | Asia          |
| 97           | 2005-2016    | 2010.5              | 2018 Xu QS        | China (Mainland) | surveillance  | 12       | Late diagnosis was defined as AIDS diagnosis at HIV diagnosis or within one year following HIV diagnosis                                                                                                                                                                                                                                                                                                                                                                                                                                                                                             | 10                 | 58                   | 2                  | 62                   | 21                | 90                  | 33         | 210          | 168         | 42            | 30.32  | Asia          |
| 98           | 2013-2017    | 2015                | 2019 Zhang ZH     | China (Mainland) | surveillance  | NA       | (1) The HIV/AIDS patients died from non-accidental causes.<br>(2) Regardless of its surviving or not, the HIV/AIDS patients with CD4 count less than 200 $\mu$ l, were included.<br>(3) The patients were diagnosed as AIDS with CD4 count between 200 and 499 $\mu$ l.<br>(4) The patients were diagnosed as AIDS by clinicians without CD4 count test.<br>(5) Based on the inference of existing data, a portion of patients was considered as AIDS without clinical diagnosis or CD4 count test.                                                                                                  | 109                | 393                  | NA                 | NA                   | 136               | 301                 | 253        | 714          | 627         | 87            | 36.2   | Asia          |
| 99           | 2010-2017    | 2013.5              | 2018 Ye L         | China (Mainland) | surveillance  | NA       | (1) The HIV/AIDS patients died from non-accidental causes.<br>(2) Regardless of its surviving or not, the HIV/AIDS patients with CD4 count less than 200 $\mu$ l, were included.<br>(3) The patients were diagnosed as AIDS with CD4 count between 200 and 499 $\mu$ l.<br>(4) The patients were diagnosed as AIDS by clinicians without CD4 count test.<br>(5) Based on the inference of existing data, a portion of patients was considered as AIDS without clinical diagnosis or CD4 count test.                                                                                                  | 126                | 438                  | 0                  | 24                   | 205               | 502                 | 333        | 972          | 830         | 142           | 39     | Asia          |
| 100          | 2012-2017    | 2014.5              | 2019 Zhu Y        | China (Mainland) | surveillance  | NA       | (1) The newly diagnosed HIV/AIDS patients died from non-accidental causes.<br>(2) Regardless of its surviving or not, the HIV/AIDS patients with CD4 count less than 200 $\mu$ l, were included.<br>(3) The patients were diagnosed as AIDS with CD4 count between 200 and 499 $\mu$ l.<br>(4) The patients were diagnosed as AIDS by clinicians without CD4 count test.<br>(5) Based on the inference of existing data, a portion of patients was considered as AIDS without clinical diagnosis or CD4 count test.                                                                                  | 13                 | 46                   | 4                  | 6                    | 425               | 897                 | 442        | 931          | 667         | 264           | 56     | Asia          |
| 101          | 2012-2016    | 2014                | 2018 Huang SZ     | China (Mainland) | surveillance  | NA       | (1) The newly diagnosed HIV/AIDS patients died from non-accidental causes.<br>(2) Regardless of its surviving or not, the HIV/AIDS patients with CD4 count less than 200 $\mu$ l, were included.<br>(3) The patients were diagnosed as AIDS with CD4 count between 200 and 499 $\mu$ l.                                                                                                                                                                                                                                                                                                              | 115                | 377                  | 26                 | 56                   | 180               | 377                 | 323        | 933          | 802         | 131           | 36.5   | Asia          |

For convergence of estimate in analysis of heterogeneity, we deleted the 'no. of AHD via IDU' and the 'no. of PLHIV via IDU' of 2018 Ye L's study arbitrarily when conducting statistical analysis, which provides with 0 case of AHD via IDU and 24 cases of PLHIV via IDU
